# Supplementary material
Source: ML conference proceedings conference paper supplement (https://openreview.net/forum?id=tGZu6DlbreV)
Supplement: supplementary_material [file attachment]

## Sheet: fb15k237
rubbish	r	#test	mr	mrr	h1	h3	h10	score
[11:25:16.388541] r = 0 EM = 1 __T__	0	39	6.5385	0.7643	0.6923	0.8205	0.8718	122.807	255.001	29.8077	26.9997	31.9995	34.0002		P2	Result Calculation					V2
[11:08:37.683270] r = 1 EM = 1 __T__	1	90	4.9333	0.4206	0.2222	0.4778	0.8778	179.856	443.997	37.854	19.998	43.002	79.002		Name=	fb15k237 rules=800 embed_dim=500 maxlen=4
[15:58:20.923659] r = 2 EM = 1 __T__	2	1311	10.3478	0.6724	0.54	0.7628	0.923	3799.54	13566	881.516	707.94	1000.03	1210.05		E=	237	← Fill this !!!
[10:43:20.022828] r = 3 EM = 1 __T__	3	13	6.7692	0.632	0.4615	0.6923	0.9231	35.2157	87.9996	8.216	5.9995	8.9999	12.0003		Cols=	C	J	K	L	M	N
[14:45:12.215262] r = 4 EM = 1 __T__	4	722	8.7853	0.5049	0.3518	0.5845	0.8241	1635.55	6342.99	364.538	254	422.009	595		Tmp=	20466	2.99708e+06	9071.57	7049.02	10015	13089
[11:42:16.043318] r = 5 EM = 1 __T__	5	1	13	0.0769	0	0	0	0.0769	13	0.0769	0	0	0			20466	6.50405e+06	5019.55	3266.95	5539.84	8603.06
[11:45:01.856165] r = 6 EM = 1 __T__	6	22	1	1	1	1	1	88	22	22	22	22	22			40932	9.50113e+06	14091.1	10316	15554.9	21692.1
[12:16:59.104481] r = 7 EM = 1 __T__	7	73	83.6712	0.4984	0.3973	0.5479	0.6849	155.38	6108	36.3832	29.0029	39.9967	49.9977		Result=
[11:32:30.746446] r = 8 EM = 1 __T__	8	2	2	0.6667	0.5	1	1	6.3334	4	1.3334	1	2	2			146.442	0.443251	0.344426	0.48935	0.639549
[14:22:19.378291] r = 9 EM = 1 __T__	9	132	134.136	0.2173	0.1288	0.2424	0.3788	127.684	17706	28.6836	17.0016	31.9968	50.0016			317.798	0.245263	0.159628	0.270685	0.420359
[12:14:31.585738] r = 10 EM = 1 __T__	10	217	317.415	0.0996	0.0369	0.0783	0.2488	100.601	68879	21.6132	8.0073	16.9911	53.9896			232.12	0.344257	0.252027	0.380018	0.529954
[13:38:18.432568] r = 11 EM = 1 __T__	11	41	29.6341	0.3755	0.1707	0.439	0.9024	77.3916	1215	15.3955	6.9987	17.999	36.9984
[12:17:33.445387] r = 12 EM = 1 __T__	12	34	156.177	0.2622	0.1471	0.3235	0.5294	42.9148	5310	8.9148	5.0014	10.999	17.9996
[11:32:26.241145] r = 13 EM = 1 __T__	13	105	2.1238	0.7196	0.5714	0.8286	1	327.558	222.999	75.558	59.997	87.003	105
[11:43:48.227921] r = 14 EM = 1 __T__	14	10	1	1	1	1	1	40	10	10	10	10	10
[11:29:08.073864] r = 15 EM = 1 __T__	15	11	1508.82	0.8182	0.8182	0.8182	0.8182	36.0008	16597	9.0002	9.0002	9.0002	9.0002
[12:46:00.494050] r = 16 EM = 1 __T__	16	86	61.2442	0.0843	0.0116	0.0814	0.2209	34.2452	5267	7.2498	0.9976	7.0004	18.9974
[15:21:26.032564] r = 17 EM = 1 __T__	17	314	30.1481	0.7809	0.7166	0.8121	0.9204	1014.22	9466.5	245.203	225.012	254.999	289.006
[12:41:05.241569] r = 18 EM = 1 __T__	18	13	25.6923	0.1058	0	0	0.4615	7.3749	334	1.3754	0	0	5.9995
[12:53:30.518091] r = 19 EM = 1 __T__	19	22	3.7273	0.7592	0.6818	0.8182	0.9091	69.7026	82.0006	16.7024	14.9996	18.0004	20.0002
[12:41:39.133902] r = 20 EM = 1 __T__	20	26	178.154	0.1199	0.0769	0.1154	0.2308	14.118	4632	3.1174	1.9994	3.0004	6.0008
[13:59:56.361125] r = 21 EM = 1 __T__	21	24	159.583	0.1371	0	0.1667	0.4583	18.2904	3830	3.2904	0	4.0008	10.9992
[16:04:06.660220] r = 22 EM = 1 __T__	22	305	195.439	0.2188	0.1246	0.2557	0.3869	300.73	59609	66.734	38.003	77.9885	118.005
[12:42:24.443686] r = 23 EM = 1 __T__	23	60	1	1	1	1	1	240	60	60	60	60	60
[12:40:14.989290] r = 24 EM = 1 __T__	24	14	366.929	0.1379	0	0.2857	0.5714	13.93	5137	1.9306	0	3.9998	7.9996
[12:41:18.994009] r = 25 EM = 1 __T__	25	8	1390.25	0.0075	0	0	0	0.06	11122	0.06	0	0	0
[12:45:14.110026] r = 26 EM = 1 __T__	26	0	0	0	0	0	0	0	0	0	0	0	0
[12:47:11.872103] r = 27 EM = 1 __T__	27	16	144.188	0.2987	0.25	0.25	0.4375	19.7792	2307	4.7792	4	4	7
[13:03:27.513291] r = 28 EM = 1 __T__	28	24	400.75	0.2383	0.1667	0.25	0.4167	25.7208	9618	5.7192	4.0008	6	10.0008
[12:43:07.115515] r = 29 EM = 1 __T__	29	3	1.3333	0.8333	0.6667	1	1	10.5	3.9999	2.4999	2.0001	3	3
[15:54:34.151629] r = 30 EM = 1 __T__	30	170	304.632	0.2017	0.1235	0.2059	0.4	158.287	51787.5	34.289	20.995	35.003	68
[14:03:55.572354] r = 31 EM = 1 __T__	31	330	544.152	0.112	0.0576	0.1091	0.2333	168.96	179570	36.96	19.008	36.003	76.989
[13:23:19.501945] r = 32 EM = 1 __T__	32	11	148.546	0.1229	0	0.1818	0.3636	7.3513	1634	1.3519	0	1.9998	3.9996
[12:45:31.590275] r = 33 EM = 1 __T__	33	24	13.0417	0.1982	0.0417	0.2917	0.5	24.7584	313.001	4.7568	1.0008	7.0008	12
[12:42:31.769621] r = 34 EM = 1 __T__	34	13	2.6154	0.5474	0.3077	0.7692	1	34.1159	34.0002	7.1162	4.0001	9.9996	13
[14:41:23.169015] r = 35 EM = 1 __T__	35	151	1.053	0.9807	0.9669	0.9934	1	595.091	159.003	148.086	146.002	150.003	151
[12:39:40.177146] r = 36 EM = 1 __T__	36	22	1	1	1	1	1	88	22	22	22	22	22
[12:56:04.836319] r = 37 EM = 1 __T__	37	7	9.2857	0.8596	0.8571	0.8571	0.8571	24.0163	64.9999	6.0172	5.9997	5.9997	5.9997
[13:26:11.239182] r = 38 EM = 1 __T__	38	14	1.2143	0.9464	0.9286	0.9286	1	53.2504	17.0002	13.2496	13.0004	13.0004	14
[13:31:19.008640] r = 39 EM = 1 __T__	39	311	1551.01	0.0308	0.0129	0.0225	0.0547	37.5999	482365	9.5788	4.0119	6.9975	17.0117
[13:03:55.854840] r = 40 EM = 1 __T__	40	29	8.5517	0.2971	0.1034	0.3448	0.7586	43.6131	247.999	8.6159	2.9986	9.9992	21.9994
[13:17:37.477589] r = 41 EM = 1 __T__	41	3	3.3333	0.3056	0	0.6667	1	5.9169	9.9999	0.9168	0	2.0001	3
[13:20:29.193189] r = 42 EM = 1 __T__	42	48	1.0833	0.9583	0.9167	1	1	186	51.9984	45.9984	44.0016	48	48
[13:16:15.781007] r = 43 EM = 1 __T__	43	11	1.2727	0.8636	0.7273	1	1	39.4999	13.9997	9.4996	8.0003	11	11
[12:44:03.589907] r = 44 EM = 1 __T__	44	11	458.273	0.0837	0	0.1818	0.1818	4.9203	5041	0.9207	0	1.9998	1.9998
[13:23:55.854288] r = 45 EM = 1 __T__	45	16	7.9375	0.5129	0.3125	0.625	0.875	37.2064	127	8.2064	5	10	14
[13:24:02.056008] r = 46 EM = 1 __T__	46	19	321.789	0.1002	0	0.1053	0.2632	8.9053	6114	1.9038	0	2.0007	5.0008
[13:06:15.232634] r = 47 EM = 1 __T__	47	29	141.655	0.0721	0.0345	0.0345	0.1034	7.0905	4108	2.0909	1.0005	1.0005	2.9986
[13:20:53.313610] r = 48 EM = 1 __T__	48	23	42.6957	0.0857	0	0.0435	0.2609	8.9723	982.001	1.9711	0	1.0005	6.0007
[13:23:45.679570] r = 49 EM = 1 __T__	49	40	21.775	0.1329	0.025	0.125	0.45	29.316	871	5.316	1	5	18
[14:07:50.822482] r = 50 EM = 1 __T__	50	152	15.5132	0.2768	0.1118	0.3618	0.6118	207.054	2358.01	42.0736	16.9936	54.9936	92.9936
[13:22:54.285253] r = 51 EM = 1 __T__	51	20	1	1	1	1	1	80	20	20	20	20	20
[13:47:46.680134] r = 52 EM = 1 __T__	52	38	1.4737	0.818	0.6842	0.9737	1	132.084	56.0006	31.084	25.9996	37.0006	38
[13:41:20.067991] r = 53 EM = 1 __T__	53	13	3.3077	0.3872	0.0769	0.6154	1	27.0335	43.0001	5.0336	0.9997	8.0002	13
[14:42:35.219630] r = 54 EM = 1 __T__	54	10	1.4	0.8	0.6	1	1	34	14	8	6	10	10
[14:47:25.459897] r = 55 EM = 1 __T__	55	31	5.7742	0.6163	0.5484	0.6452	0.7742	80.1071	179	19.1053	17.0004	20.0012	24.0002
[14:32:26.475701] r = 56 EM = 1 __T__	56	17	7.4706	0.376	0.1765	0.3529	0.8824	30.3926	127	6.392	3.0005	5.9993	15.0008
[14:34:40.235534] r = 57 EM = 1 __T__	57	11	28.9091	0.6679	0.5455	0.8182	0.8182	31.3478	318	7.3469	6.0005	9.0002	9.0002
[22:31:37.823587] r = 58 EM = 1 __T__	58	402	1	1	1	1	1	1608	402	402	402	402	402
[16:07:46.319062] r = 59 EM = 1 __T__	59	664	101.846	0.1737	0.0949	0.1883	0.3163	513.405	67626	115.337	63.0136	125.031	210.023
[16:22:25.894926] r = 60 EM = 1 __T__	60	100	190.875	0.2958	0.17	0.38	0.51	135.58	19087.5	29.58	17	38	51
[16:26:51.252593] r = 61 EM = 1 __T__	61	55	17.7636	0.2878	0.0909	0.4182	0.6909	81.829	976.998	15.829	4.9995	23.001	37.9995
[16:03:02.665318] r = 62 EM = 1 __T__	62	77	3.2597	0.5569	0.3377	0.7403	0.974	200.885	250.997	42.8813	26.0029	57.0031	74.998
[15:43:51.664702] r = 63 EM = 1 __T__	63	2	4458	0.0009	0	0	0	0.0018	8916	0.0018	0	0	0
[12:10:10.004315] r = 64 EM = 1 __T__	64	0	0	0	0	0	0	0	0	0	0	0	0
[11:37:57.886220] r = 65 EM = 1 __T__	65	4	1.5	0.8333	0.75	1	1	14.3332	6	3.3332	3	4	4
[18:05:13.640659] r = 66 EM = 1 __T__	66	18	4.1111	0.5148	0.2778	0.6667	0.8889	42.2676	73.9998	9.2664	5.0004	12.0006	16.0002
[11:34:18.680738] r = 67 EM = 1 __T__	67	3	1	1	1	1	1	12	3	3	3	3	3
[16:22:20.255804] r = 68 EM = 1 __T__	68	8	135.75	0.048	0	0	0.125	1.384	1086	0.384	0	0	1
[12:09:51.396814] r = 69 EM = 1 __T__	69	3	1	1	1	1	1	12	3	3	3	3	3
[12:12:13.610370] r = 70 EM = 1 __T__	70	25	47.72	0.2347	0.16	0.24	0.36	24.8675	1193	5.8675	4	6	9
[13:12:58.293487] r = 71 EM = 1 __T__	71	53	1077.26	0.0878	0.0566	0.0566	0.2075	21.6505	57095	4.6534	2.9998	2.9998	10.9975
[12:04:19.305217] r = 72 EM = 1 __T__	72	9	13.8889	0.4176	0.3333	0.4444	0.5556	15.7581	125	3.7584	2.9997	3.9996	5.0004
[15:59:33.192894] r = 73 EM = 1 __T__	73	11	248.909	0.0356	0	0	0.0909	1.3915	2738	0.3916	0	0	0.9999
[12:55:54.093504] r = 74 EM = 1 __T__	74	1	5	0.2	0	0	1	1.2	5	0.2	0	0	1
[17:13:41.538419] r = 75 EM = 1 __T__	75	1447	6.5895	0.4303	0.2274	0.557	0.8459	2981.69	9535.01	622.644	329.048	805.979	1224.02
[13:09:08.487772] r = 76 EM = 1 __T__	76	20	30.35	0.5417	0.4	0.7	0.8	48.834	607	10.834	8	14	16
[12:03:44.416513] r = 77 EM = 1 __T__	77	10	2.7	0.5033	0.2	0.8	1	25.033	27	5.033	2	8	10
[12:25:25.219330] r = 78 EM = 1 __T__	78	0	0	0	0	0	0	0	0	0	0	0	0
[12:47:59.458116] r = 79 EM = 1 __T__	79	84	1	1	1	1	1	336	84	84	84	84	84
[13:41:23.126900] r = 80 EM = 1 __T__	80	323	2.0557	0.8336	0.7554	0.8885	0.9814	1117.22	663.991	269.253	243.994	286.986	316.992
[17:52:15.317831] r = 81 EM = 1 __T__	81	98	1.7551	0.8397	0.7449	0.9286	0.9898	343.294	172	82.2906	73.0002	91.0028	97.0004
[16:33:11.550967] r = 82 EM = 1 __T__	82	836	391.358	0.0871	0.0574	0.0837	0.1423	309.738	327175	72.8156	47.9864	69.9732	118.963
[13:32:30.742838] r = 83 EM = 1 __T__	83	1	1	1	1	1	1	4	1	1	1	1	1
[13:07:40.768393] r = 84 EM = 1 __T__	84	21	1.0476	0.9762	0.9524	1	1	82.5006	21.9996	20.5002	20.0004	21	21
[15:08:12.577467] r = 85 EM = 1 __T__	85	53	514.859	0.0181	0	0.0189	0.0189	2.9627	27287.5	0.9593	0	1.0017	1.0017
[18:50:06.042889] r = 86 EM = 1 __T__	86	92	134.288	0.294	0.1739	0.3261	0.5761	126.049	12354.5	27.048	15.9988	30.0012	53.0012
[13:13:18.300955] r = 87 EM = 1 __T__	87	43	1.4651	0.8062	0.6512	1	1	148.668	62.9993	34.6666	28.0016	43	43
[14:00:04.824051] r = 88 EM = 1 __T__	88	321	15.0717	0.3034	0.1651	0.3333	0.6293	459.383	4838.02	97.3914	52.9971	106.989	202.005
[13:12:05.438171] r = 89 EM = 1 __T__	89	17	46.2353	0.4234	0.2941	0.4706	0.6471	31.1984	786	7.1978	4.9997	8.0002	11.0007
[13:07:11.685560] r = 90 EM = 1 __T__	90	16	47.375	0.4554	0.3125	0.625	0.6875	33.2864	758	7.2864	5	10	11
[13:12:49.427758] r = 91 EM = 1 __T__	91	27	555.778	0.0255	0	0	0.037	1.6875	15006	0.6885	0	0	0.999
[13:38:29.862068] r = 92 EM = 1 __T__	92	9	58.6667	0.2981	0.2222	0.3333	0.4444	11.682	528	2.6829	1.9998	2.9997	3.9996
[13:10:13.357258] r = 93 EM = 1 __T__	93	0	0	0	0	0	0	0	0	0	0	0	0
[17:20:58.669090] r = 94 EM = 1 __T__	94	10	6.3	0.5865	0.5	0.6	0.8	24.865	63	5.865	5	6	8
[15:06:46.756144] r = 95 EM = 1 __T__	95	11	4.3636	0.2615	0	0.3636	1	17.8761	47.9996	2.8765	0	3.9996	11
[13:59:22.889676] r = 96 EM = 1 __T__	96	20	1	1	1	1	1	80	20	20	20	20	20
[13:51:48.464136] r = 97 EM = 1 __T__	97	80	20.1125	0.7705	0.6625	0.85	0.9875	261.64	1609	61.64	53	68	79
[13:07:18.663143] r = 98 EM = 1 __T__	98	3	1.6667	0.6667	0.3333	1	1	9	5.0001	2.0001	0.9999	3	3
[16:00:44.928513] r = 99 EM = 1 __T__	99	4	40.25	0.1949	0	0.25	0.5	3.7796	161	0.7796	0	1	2
[13:01:49.878027] r = 100 EM = 1 __T__	100	2	1.5	0.75	0.5	1	1	6.5	3	1.5	1	2	2
[13:21:18.211350] r = 101 EM = 1 __T__	101	21	1.1905	0.9048	0.8095	1	1	78.0003	25.0005	19.0008	16.9995	21	21
[14:27:23.000419] r = 102 EM = 1 __T__	102	26	15.0769	0.382	0.2692	0.3462	0.6538	42.9312	391.999	9.932	6.9992	9.0012	16.9988
[14:11:39.728186] r = 103 EM = 1 __T__	103	34	296.074	0.2559	0.1176	0.2647	0.5882	41.6976	10066.5	8.7006	3.9984	8.9998	19.9988
[13:53:42.232062] r = 104 EM = 1 __T__	104	1	41	0.0244	0	0	0	0.0244	41	0.0244	0	0	0
[14:16:49.423694] r = 105 EM = 1 __T__	105	287	78.9373	0.2059	0.1498	0.2056	0.3171	252.101	22655	59.0933	42.9926	59.0072	91.0077
[13:53:48.588058] r = 106 EM = 1 __T__	106	20	95.9	0.1095	0.05	0.1	0.15	8.19	1918	2.19	1	2	3
[13:44:20.572981] r = 107 EM = 1 __T__	107	20	1	1	1	1	1	80	20	20	20	20	20
[13:45:43.920598] r = 108 EM = 1 __T__	108	858	104.732	0.0884	0.0186	0.0723	0.2459	364.822	89860	75.8472	15.9588	62.0334	210.982
[13:50:54.098892] r = 109 EM = 1 __T__	109	31	16.1935	0.1943	0.0645	0.2258	0.4516	29.0222	501.999	6.0233	1.9995	6.9998	13.9996
[14:05:07.071770] r = 110 EM = 1 __T__	110	251	1163.38	0.0474	0.0159	0.0478	0.0916	50.8777	292009	11.8974	3.9909	11.9978	22.9916
[15:32:30.783132] r = 111 EM = 1 __T__	111	606	2.538	0.7142	0.5776	0.8152	0.9637	1860.84	1538.03	432.805	350.026	494.011	584.002
[13:43:01.782972] r = 112 EM = 1 __T__	112	12	1	1	1	1	1	48	12	12	12	12	12
[14:07:42.499317] r = 113 EM = 1 __T__	113	41	207.671	0.6402	0.561	0.6829	0.8293	111.249	8514.5	26.2482	23.001	27.9989	34.0013
[17:13:36.450709] r = 114 EM = 1 __T__	114	131	4.0611	0.7564	0.6565	0.8321	0.9237	415.1	532.004	99.0884	86.0015	109.005	121.005
[13:47:08.985730] r = 115 EM = 1 __T__	115	13	335.846	0.1875	0.1538	0.1538	0.2308	9.4367	4366	2.4375	1.9994	1.9994	3.0004
[14:36:45.303657] r = 116 EM = 1 __T__	116	48	1	1	1	1	1	192	48	48	48	48	48
[14:20:34.908300] r = 117 EM = 1 __T__	117	70	97.8	0.0421	0	0.0286	0.0571	8.946	6846	2.947	0	2.002	3.997
[15:35:01.297788] r = 118 EM = 1 __T__	118	153	157.614	0.0373	0.0065	0.0261	0.0654	20.7009	24115	5.7069	0.9945	3.9933	10.0062
[15:22:37.640359] r = 119 EM = 1 __T__	119	34	50.7353	0.2531	0.1765	0.2353	0.4412	37.6074	1725	8.6054	6.001	8.0002	15.0008
[16:12:25.686433] r = 120 EM = 1 __T__	120	60	355.008	0.4238	0.2833	0.5333	0.6667	114.426	21300.5	25.428	16.998	31.998	40.002
[15:17:23.953928] r = 121 EM = 1 __T__	121	53	18.2453	0.1514	0.0189	0.1509	0.4717	42.0237	967.001	8.0242	1.0017	7.9977	25.0001
[02:06:29.161183] r = 122 EM = 1 __T__	122	9	11.2222	0.2399	0.1111	0.2222	0.5556	10.1592	101	2.1591	0.9999	1.9998	5.0004
[16:53:20.061842] r = 123 EM = 1 __T__	123	258	16.4341	0.3269	0.2171	0.3295	0.6008	380.369	4240	84.3402	56.0118	85.011	155.006
[17:23:59.712232] r = 124 EM = 1 __T__	124	91	747.775	0.1002	0.0549	0.1099	0.1868	41.1138	68047.5	9.1182	4.9959	10.0009	16.9988
[22:03:53.033380] r = 125 EM = 1 __T__	125	1067	11.9841	0.3564	0.1884	0.4264	0.7404	1826.28	12787	380.279	201.023	454.969	790.007
[20:42:53.626921] r = 126 EM = 1 __T__	126	346	1.0578	0.9711	0.9422	1	1	1354	365.999	336.001	326.001	346	346
[16:17:29.249800] r = 127 EM = 1 __T__	127	12	1	1	1	1	1	48	12	12	12	12	12
[13:09:41.533320] r = 128 EM = 1 __T__	128	22	57.5	0.1159	0	0.1364	0.4091	14.5508	1265	2.5498	0	3.0008	9.0002
[12:07:24.601090] r = 129 EM = 1 __T__	129	121	196.483	0.2146	0.1322	0.2562	0.3719	117.963	23774.5	25.9666	15.9962	31.0002	44.9999
[18:48:13.383874] r = 130 EM = 1 __T__	130	53	1.5094	0.9818	0.9811	0.9811	0.9811	208.03	79.9982	52.0354	51.9983	51.9983	51.9983
[12:20:47.491260] r = 131 EM = 1 __T__	131	32	1.125	0.9609	0.9375	0.9688	1	123.75	36	30.7488	30	31.0016	32
[16:49:37.787168] r = 132 EM = 1 __T__	132	15	4.0667	0.7952	0.7333	0.8667	0.8667	48.9285	61.0005	11.928	10.9995	13.0005	13.0005
[13:25:04.025633] r = 133 EM = 1 __T__	133	32	145.5	0.2654	0.1562	0.3125	0.4688	38.4928	4656	8.4928	4.9984	10	15.0016
[12:39:00.717541] r = 134 EM = 1 __T__	134	29	44.1724	0.3634	0.2414	0.4138	0.6207	47.5397	1281	10.5386	7.0006	12.0002	18.0003
[14:10:11.573358] r = 135 EM = 1 __T__	135	94	5.6064	0.56	0.4255	0.617	0.8404	229.633	527.002	52.64	39.997	57.998	78.9976
[12:33:27.770571] r = 136 EM = 1 __T__	136	63	10.5079	0.3977	0.254	0.4603	0.6984	114.055	661.998	25.0551	16.002	28.9989	43.9992
[16:30:22.659194] r = 137 EM = 1 __T__	137	7	1269.14	0.2671	0.1429	0.4286	0.4286	8.8704	8884	1.8697	1.0003	3.0002	3.0002
[13:22:53.816344] r = 138 EM = 1 __T__	138	0	0	0	0	0	0	0	0	0	0	0	0
[18:29:27.020158] r = 139 EM = 1 __T__	139	16	1	1	1	1	1	64	16	16	16	16	16
[13:45:34.906626] r = 140 EM = 1 __T__	140	13	641.462	0.5311	0.3077	0.7692	0.8462	31.9046	8339	6.9043	4.0001	9.9996	11.0006
[12:42:15.222366] r = 141 EM = 1 __T__	141	16	1.0625	0.9688	0.9375	1	1	62.5008	17	15.5008	15	16	16
[13:18:47.196281] r = 142 EM = 1 __T__	142	13	1	1	1	1	1	52	13	13	13	13	13
[14:13:12.250418] r = 143 EM = 1 __T__	143	26	483.904	0.1438	0.0385	0.1923	0.3077	17.7398	12581.5	3.7388	1.001	4.9998	8.0002
[14:13:26.458183] r = 144 EM = 1 __T__	144	0	0	0	0	0	0	0	0	0	0	0	0
[18:45:01.883444] r = 145 EM = 1 __T__	145	38	19.6842	0.5192	0.3947	0.6316	0.6842	84.7286	748	19.7296	14.9986	24.0008	25.9996
[18:14:21.795912] r = 146 EM = 1 __T__	146	11	344.273	0.213	0.0909	0.3636	0.4545	12.342	3787	2.343	0.9999	3.9996	4.9995
[14:32:56.938106] r = 147 EM = 1 __T__	147	50	1.72	0.7946	0.66	0.92	1	168.73	86	39.73	33	46	50
[18:56:56.896720] r = 148 EM = 1 __T__	148	436	1.7867	0.9381	0.8807	0.9954	0.9954	1660.99	779.001	409.012	383.985	433.994	433.994
[16:32:30.004818] r = 149 EM = 1 __T__	149	78	202.032	0.365	0.2436	0.4231	0.5897	126.469	15758.5	28.47	19.0008	33.0018	45.9966
[20:02:02.231888] r = 150 EM = 1 __T__	150	46	1	1	1	1	1	184	46	46	46	46	46
[13:40:41.503678] r = 151 EM = 1 __T__	151	2	44	0.0227	0	0	0	0.0454	88	0.0454	0	0	0
[14:50:02.724972] r = 152 EM = 1 __T__	152	38	1.1579	0.9298	0.8684	1	1	144.332	44.0002	35.3324	32.9992	38	38
[13:29:47.317746] r = 153 EM = 1 __T__	153	10	1835.55	0.7001	0.7	0.7	0.7	28.001	18355.5	7.001	7	7	7
[13:35:42.232473] r = 154 EM = 1 __T__	154	11	108.091	0.3065	0.2727	0.2727	0.4545	14.3704	1189	3.3715	2.9997	2.9997	4.9995
[14:58:18.969629] r = 155 EM = 1 __T__	155	118	18.2373	0.2157	0.0847	0.2288	0.5763	130.449	2152	25.4526	9.9946	26.9984	68.0034
[14:02:34.309286] r = 156 EM = 1 __T__	156	11	1	1	1	1	1	44	11	11	11	11	11
[13:54:08.845757] r = 157 EM = 1 __T__	157	7	1.7143	0.6429	0.2857	1	1	20.5002	12.0001	4.5003	1.9999	7	7
[17:53:19.888050] r = 158 EM = 1 __T__	158	2	28.5	0.066	0	0	0.5	1.132	57	0.132	0	0	1
[15:56:18.201799] r = 159 EM = 1 __T__	159	31	335.903	0.4192	0.3226	0.4516	0.5484	53.9958	10413	12.9952	10.0006	13.9996	17.0004
[14:27:08.602340] r = 160 EM = 1 __T__	160	0	0	0	0	0	0	0	0	0	0	0	0
[14:30:22.577619] r = 161 EM = 1 __T__	161	27	1.2963	0.9086	0.8519	0.963	1	100.534	35.0001	24.5322	23.0013	26.001	27
[13:31:09.942660] r = 162 EM = 1 __T__	162	27	407.555	0.1022	0.0741	0.0741	0.1852	11.7612	11004	2.7594	2.0007	2.0007	5.0004
[16:30:41.769921] r = 163 EM = 1 __T__	163	3	4	0.3254	0	0.6667	1	5.9763	12	0.9762	0	2.0001	3
[13:37:31.891257] r = 164 EM = 1 __T__	164	21	3.5714	0.7931	0.7619	0.8095	0.9048	68.6553	74.9994	16.6551	15.9999	16.9995	19.0008
[13:38:04.464553] r = 165 EM = 1 __T__	165	0	0	0	0	0	0	0	0	0	0	0	0
[15:11:57.549476] r = 166 EM = 1 __T__	166	124	223.298	0.1127	0.0565	0.129	0.1935	60.9708	27689	13.9748	7.006	15.996	23.994
[15:01:21.441152] r = 167 EM = 1 __T__	167	4	1.75	0.7083	0.5	1	1	12.8332	7	2.8332	2	4	4
[14:33:01.633872] r = 168 EM = 1 __T__	168	94	1744.38	0.0074	0	0	0.0106	1.692	163972	0.6956	0	0	0.9964
[14:51:11.575353] r = 169 EM = 1 __T__	169	9	1010.5	0.1631	0	0.3333	0.3333	7.4673	9094.5	1.4679	0	2.9997	2.9997
[14:18:52.343436] r = 170 EM = 1 __T__	170	91	202.879	0.1915	0.0769	0.2198	0.4066	81.4268	18462	17.4265	6.9979	20.0018	37.0006
[14:26:29.570837] r = 171 EM = 1 __T__	171	24	1	1	1	1	1	96	24	24	24	24	24
[14:41:10.981858] r = 172 EM = 1 __T__	172	31	137.323	0.0245	0	0	0.0645	2.759	4257	0.7595	0	0	1.9995
[14:55:23.645623] r = 173 EM = 1 __T__	173	235	61.2638	0.2127	0.1149	0.2213	0.4213	227.997	14397	49.9845	27.0015	52.0055	99.0055
[15:06:11.096689] r = 174 EM = 1 __T__	174	46	141.13	0.0227	0	0	0	1.0442	6492	1.0442	0	0	0
[16:37:28.405385] r = 175 EM = 1 __T__	175	17	647.971	0.531	0.4706	0.5882	0.5882	37.026	11015.5	9.027	8.0002	9.9994	9.9994
[14:13:25.958764] r = 176 EM = 1 __T__	176	117	2.0513	0.8564	0.7863	0.906	0.9573	410.202	240.002	100.199	91.9971	106.002	112.004
[14:36:46.721182] r = 177 EM = 1 __T__	177	8	3.875	0.6007	0.375	0.75	0.875	20.8056	31	4.8056	3	6	7
[18:28:08.181225] r = 178 EM = 1 __T__	178	13	16.2308	0.2482	0	0.4615	0.5385	16.2266	211	3.2266	0	5.9995	7.0005
[14:35:09.755991] r = 179 EM = 1 __T__	179	317	158.107	0.2042	0.1325	0.2145	0.3407	282.732	50120	64.7314	42.0025	67.9965	108.002
[15:10:08.840499] r = 180 EM = 1 __T__	180	0	0	0	0	0	0	0	0	0	0	0	0
[14:56:20.994382] r = 181 EM = 1 __T__	181	14	15.9286	0.2705	0.1429	0.2857	0.4286	15.7878	223	3.787	2.0006	3.9998	6.0004
[16:31:41.688072] r = 182 EM = 1 __T__	182	13	1	1	1	1	1	52	13	13	13	13	13
[16:01:00.046500] r = 183 EM = 1 __T__	183	43	1.5349	0.8264	0.7209	0.9302	1	149.532	66.0007	35.5352	30.9987	39.9986	43
[16:59:37.554580] r = 184 EM = 1 __T__	184	41	3.4146	0.4803	0.2683	0.6098	1	96.6944	139.999	19.6923	11.0003	25.0018	41
[15:49:35.790488] r = 185 EM = 1 __T__	185	11	7.9091	0.2929	0.1818	0.1818	0.5455	13.222	87.0001	3.2219	1.9998	1.9998	6.0005
[08:19:31.113444] r = 186 EM = 1 __T__	186	494	3.9494	0.8715	0.8158	0.915	0.9595	1759.53	1951	430.521	403.005	452.01	473.993
[19:19:14.940166] r = 187 EM = 1 __T__	187	158	1.0316	0.9842	0.9684	1	1	624.511	162.993	155.504	153.007	158	158
[18:23:02.552738] r = 188 EM = 1 __T__	188	39	1.2564	0.8889	0.7949	1	1	143.668	48.9996	34.6671	31.0011	39	39
[00:10:25.366903] r = 189 EM = 1 __T__	189	9	170.889	0.1462	0.1111	0.1111	0.2222	5.3154	1538	1.3158	0.9999	0.9999	1.9998
[22:23:13.907570] r = 190 EM = 1 __T__	190	30	2.2	0.8054	0.7	0.9	0.9667	101.163	66	24.162	21	27	29.001
[17:08:10.538559] r = 191 EM = 1 __T__	191	17	9.1765	0.5193	0.4118	0.5882	0.7059	37.8284	156.001	8.8281	7.0006	9.9994	12.0003
[13:54:43.801637] r = 192 EM = 1 __T__	192	9	3.3333	0.437	0.2222	0.4444	1	18.9324	29.9997	3.933	1.9998	3.9996	9
[13:13:32.201504] r = 193 EM = 1 __T__	193	25	1.72	0.8783	0.84	0.88	1	89.9575	43	21.9575	21	22	25
[19:31:58.554056] r = 194 EM = 1 __T__	194	97	101.634	0.3773	0.2371	0.433	0.6907	168.596	9858.5	36.5981	22.9987	42.001	66.9979
[12:46:52.583573] r = 195 EM = 1 __T__	195	42	30.381	0.118	0.0238	0.119	0.3095	23.9526	1276	4.956	0.9996	4.998	12.999
[17:21:57.997242] r = 196 EM = 1 __T__	196	60	4.1833	0.6418	0.45	0.8167	0.9	168.51	250.998	38.508	27	49.002	54
[15:38:59.099115] r = 197 EM = 1 __T__	197	137	1.0438	0.9836	0.9708	0.9927	1	540.753	143.001	134.753	133	136	137
[13:14:00.128879] r = 198 EM = 1 __T__	198	63	5.3175	0.3272	0.0952	0.4127	0.9365	111.611	335.002	20.6136	5.9976	26.0001	58.9995
[14:54:43.539956] r = 199 EM = 1 __T__	199	160	372.094	0.0545	0.0063	0.0688	0.1187	39.728	59535	8.72	1.008	11.008	18.992
[13:01:38.283594] r = 200 EM = 1 __T__	200	8	53.75	0.3421	0.25	0.375	0.375	10.7368	430	2.7368	2	3	3
[17:55:33.953408] r = 201 EM = 1 __T__	201	55	527.273	0.4028	0.2909	0.4364	0.6545	98.153	29000	22.154	15.9995	24.002	35.9975
[13:54:21.398399] r = 202 EM = 1 __T__	202	16	98.5625	0.0819	0	0.0625	0.3125	7.3104	1577	1.3104	0	1	5
[19:19:16.683860] r = 203 EM = 1 __T__	203	1	1	1	1	1	1	4	1	1	1	1	1
[14:30:42.918981] r = 204 EM = 1 __T__	204	266	413.44	0.0563	0.0226	0.0489	0.1241	67.0054	109975	14.9758	6.0116	13.0074	33.0106
[13:14:44.632545] r = 205 EM = 1 __T__	205	85	157.482	0.1021	0.0471	0.0941	0.2	37.6805	13386	8.6785	4.0035	7.9985	17
[13:51:39.423529] r = 206 EM = 1 __T__	206	6	13.5	0.1842	0	0.3333	0.6667	7.1052	81	1.1052	0	1.9998	4.0002
[14:51:26.635030] r = 207 EM = 1 __T__	207	9	3.2222	0.3426	0	0.7778	1	19.0836	28.9998	3.0834	0	7.0002	9
[14:44:33.877277] r = 208 EM = 1 __T__	208	0	0	0	0	0	0	0	0	0	0	0	0
[19:09:10.412358] r = 209 EM = 1 __T__	209	7	1634.14	0.0299	0	0	0	0.2093	11439	0.2093	0	0	0
[18:56:23.431423] r = 210 EM = 1 __T__	210	7	28.4286	0.4913	0.2857	0.7143	0.8571	16.4388	199	3.4391	1.9999	5.0001	5.9997
[15:07:28.313685] r = 211 EM = 1 __T__	211	16	2.8125	0.67	0.5	0.8125	0.9375	46.72	45	10.72	8	13	15
[20:58:40.458447] r = 212 EM = 1 __T__	212	20	1	1	1	1	1	80	20	20	20	20	20
[18:32:48.651220] r = 213 EM = 1 __T__	213	127	4.0866	0.5626	0.378	0.6772	0.8976	319.456	518.998	71.4502	48.006	86.0044	113.995
[21:05:35.105088] r = 214 EM = 1 __T__	214	5	1	1	1	1	1	20	5	5	5	5	5
[17:16:12.221936] r = 215 EM = 1 __T__	215	214	21.0701	0.3514	0.1402	0.4626	0.8224	380.192	4509	75.1996	30.0028	98.9964	175.994
[15:40:20.124159] r = 216 EM = 1 __T__	216	167	22.7784	0.2425	0.0958	0.2814	0.5389	193.486	3803.99	40.4975	15.9986	46.9938	89.9963
[13:45:44.577481] r = 217 EM = 1 __T__	217	0	0	0	0	0	0	0	0	0	0	0	0
[14:16:24.277997] r = 218 EM = 1 __T__	218	18	3.6111	0.7142	0.6667	0.6667	0.8889	52.857	64.9998	12.8556	12.0006	12.0006	16.0002
[15:57:34.948183] r = 219 EM = 1 __T__	219	4	1	1	1	1	1	16	4	4	4	4	4
[14:12:28.436780] r = 220 EM = 1 __T__	220	3	2.3333	0.4444	0	1	1	7.3332	6.9999	1.3332	0	3	3
[14:26:02.635106] r = 221 EM = 1 __T__	221	34	338.118	0.0352	0	0.0294	0.1471	7.1978	11496	1.1968	0	0.9996	5.0014
[18:27:17.803126] r = 222 EM = 1 __T__	222	0	0	0	0	0	0	0	0	0	0	0	0
[16:26:50.624287] r = 223 EM = 1 __T__	223	3	2	0.6111	0.3333	1	1	8.8332	6	1.8333	0.9999	3	3
[15:03:29.750870] r = 224 EM = 1 __T__	224	77	1285.69	0.0648	0.039	0.0909	0.1039	22.9922	98998	4.9896	3.003	6.9993	8.0003
[15:45:18.713608] r = 225 EM = 1 __T__	225	12	1.5833	0.7083	0.4167	1	1	37.5	18.9996	8.4996	5.0004	12	12
[13:59:11.932356] r = 226 EM = 1 __T__	226	13	31.7692	0.6729	0.6154	0.6923	0.7692	35.7474	413	8.7477	8.0002	8.9999	9.9996
[17:02:39.812938] r = 227 EM = 1 __T__	227	0	0	0	0	0	0	0	0	0	0	0	0
[14:24:24.527275] r = 228 EM = 1 __T__	228	35	166.886	0.1253	0.0286	0.1429	0.3143	21.3885	5841	4.3855	1.001	5.0015	11.0005
[14:12:06.930318] r = 229 EM = 1 __T__	229	20	2237.75	0.0784	0	0.05	0.3	8.568	44755	1.568	0	1	6
[16:06:18.394879] r = 230 EM = 1 __T__	230	96	1.1875	0.9358	0.8958	0.9792	1	365.837	114	89.8368	85.9968	94.0032	96
[15:30:22.248588] r = 231 EM = 1 __T__	231	5	6.6	0.6287	0.6	0.6	0.6	12.1435	33	3.1435	3	3	3
[15:10:28.594243] r = 232 EM = 1 __T__	232	16	1.75	0.7708	0.625	0.9375	1	53.3328	28	12.3328	10	15	16
[16:53:56.559758] r = 233 EM = 1 __T__	233	84	8.6905	0.5072	0.3214	0.6429	0.8095	191.604	730.002	42.6048	26.9976	54.0036	67.998
[15:25:44.310585] r = 234 EM = 1 __T__	234	60	1.0167	0.9917	0.9833	1	1	238.5	61.002	59.502	58.998	60	60
[14:53:39.084346] r = 235 EM = 1 __T__	235	15	2093.17	0.1977	0.1333	0.2667	0.3333	13.965	31397.5	2.9655	1.9995	4.0005	4.9995
[14:57:05.298632] r = 236 EM = 1 __T__	236	3	1	1	1	1	1	12	3	3	3	3	3
[15:50:28.545981] r = 237 EM = 1 __T__	237	39	523.551	0.1901	0.0513	0.2308	0.4872	37.4166	20418.5	7.4139	2.0007	9.0012	19.0008
[15:47:28.768185] r = 238 EM = 1 __T__	238	90	278.111	0.0184	0.0111	0.0111	0.0111	4.653	25030	1.656	0.999	0.999	0.999
[17:58:25.715940] r = 239 EM = 1 __T__	239	1311	506.134	0.0935	0.0503	0.0999	0.1716	544.458	663541	122.579	65.9433	130.969	224.968
[14:38:43.650142] r = 240 EM = 1 __T__	240	13	61.1538	0.0936	0	0.0769	0.3846	7.2163	794.999	1.2168	0	0.9997	4.9998
[15:32:07.638196] r = 241 EM = 1 __T__	241	722	248.065	0.0871	0.0429	0.0914	0.1593	274.865	179103	62.8862	30.9738	65.9908	115.015
[18:58:50.609434] r = 242 EM = 1 __T__	242	1	3	0.3333	0	1	1	2.3333	3	0.3333	0	1	1
[15:14:05.090366] r = 243 EM = 1 __T__	243	22	231.182	0.091	0.0455	0.0909	0.1364	8.0036	5086	2.002	1.001	1.9998	3.0008
[15:50:23.986403] r = 244 EM = 1 __T__	244	73	214.836	0.1523	0.0274	0.1918	0.4932	63.1231	15683	11.1179	2.0002	14.0014	36.0036
[15:18:51.201578] r = 245 EM = 1 __T__	245	2	18	0.0571	0	0	0	0.1142	36	0.1142	0	0	0
[19:00:31.451522] r = 246 EM = 1 __T__	246	132	227.106	0.1321	0.0303	0.1515	0.3636	89.43	29978	17.4372	3.9996	19.998	47.9952
[19:45:08.154119] r = 247 EM = 1 __T__	247	217	242.779	0.2786	0.1475	0.2673	0.6544	292.473	52683	60.4562	32.0075	58.0041	142.005
[19:28:34.839613] r = 248 EM = 1 __T__	248	41	22.7561	0.3868	0.1951	0.4634	0.8293	76.8586	933	15.8588	7.9991	18.9994	34.0013
[16:32:48.382872] r = 249 EM = 1 __T__	249	34	1270.13	0.0399	0.0294	0.0294	0.0588	5.355	43184.5	1.3566	0.9996	0.9996	1.9992
[10:29:19.446702] r = 250 EM = 1 __T__	250	105	1.6476	0.8722	0.8	0.9238	0.9905	376.582	172.998	91.581	84	96.999	104.003
[20:46:41.485721] r = 251 EM = 1 __T__	251	10	132.5	0.0142	0	0	0	0.142	1325	0.142	0	0	0
[18:56:05.965942] r = 252 EM = 1 __T__	252	11	1508.73	0.8182	0.8182	0.8182	0.8182	36.0008	16596	9.0002	9.0002	9.0002	9.0002
[00:56:24.075831] r = 253 EM = 1 __T__	253	86	34.8605	0.2227	0.1628	0.1977	0.2791	74.1578	2998	19.1522	14.0008	17.0022	24.0026
[00:55:44.685237] r = 254 EM = 1 __T__	254	314	162.041	0.1995	0.1083	0.2038	0.4045	287.655	50881	62.643	34.0062	63.9932	127.013
[17:39:57.868927] r = 255 EM = 1 __T__	255	13	31.5385	0.119	0	0.1538	0.3077	7.5465	410	1.547	0	1.9994	4.0001
[14:26:23.973095] r = 256 EM = 1 __T__	256	22	37.5455	0.469	0.3636	0.5455	0.6364	44.319	826.001	10.318	7.9992	12.001	14.0008
[14:12:26.972254] r = 257 EM = 1 __T__	257	26	55.0385	0.3935	0.2308	0.4231	0.8077	48.2326	1431	10.231	6.0008	11.0006	21.0002
[22:01:20.285514] r = 258 EM = 1 __T__	258	24	80.5833	0.2693	0.125	0.375	0.4583	29.4624	1934	6.4632	3	9	10.9992
[14:28:08.354184] r = 259 EM = 1 __T__	259	305	1545.59	0.0216	0.0033	0.0164	0.0557	29.585	471404	6.588	1.0065	5.002	16.9885
[17:46:54.283525] r = 260 EM = 1 __T__	260	60	1.05	0.975	0.95	1	1	235.5	63	58.5	57	60	60
[16:30:42.425137] r = 261 EM = 1 __T__	261	14	1.1429	0.9286	0.8571	1	1	52.9998	16.0006	13.0004	11.9994	14	14
[13:48:53.030477] r = 262 EM = 1 __T__	262	8	2.375	0.7125	0.625	0.75	1	24.7	19	5.7	5	6	8
[15:27:48.762439] r = 263 EM = 1 __T__	263	0	0	0	0	0	0	0	0	0	0	0	0
[13:25:05.137947] r = 264 EM = 1 __T__	264	16	139.562	0.1384	0.0625	0.125	0.3125	10.2144	2233	2.2144	1	2	5
[18:49:16.338027] r = 265 EM = 1 __T__	265	24	386.542	0.155	0.0833	0.1667	0.3333	17.7192	9277	3.72	1.9992	4.0008	7.9992
[14:30:56.735157] r = 266 EM = 1 __T__	266	3	36.6667	0.3456	0.3333	0.3333	0.3333	4.0365	110	1.0368	0.9999	0.9999	0.9999
[20:54:49.679136] r = 267 EM = 1 __T__	267	170	2954.65	0.0285	0.0176	0.0294	0.0471	20.842	502290	4.845	2.992	4.998	8.007
[18:49:55.394298] r = 268 EM = 1 __T__	268	330	131.988	0.5997	0.4939	0.6606	0.7848	837.87	43556	197.901	162.987	217.998	258.984
[14:30:02.531771] r = 269 EM = 1 __T__	269	11	114.818	0.3155	0.1818	0.4545	0.5455	16.4703	1263	3.4705	1.9998	4.9995	6.0005
[14:21:38.584265] r = 270 EM = 1 __T__	270	24	1.1667	0.9306	0.875	1	1	91.3344	28.0008	22.3344	21	24	24
[15:14:39.447284] r = 271 EM = 1 __T__	271	13	3.0769	0.5136	0.3077	0.6154	1	31.6771	39.9997	6.6768	4.0001	8.0002	13
[19:14:07.593725] r = 272 EM = 1 __T__	272	151	142.026	0.0432	0.0199	0.0199	0.0728	23.5258	21446	6.5232	3.0049	3.0049	10.9928
[19:37:32.400726] r = 273 EM = 1 __T__	273	22	27.0455	0.7442	0.6818	0.8182	0.8182	67.3728	595.001	16.3724	14.9996	18.0004	18.0004
[19:51:20.635036] r = 274 EM = 1 __T__	274	7	261.286	0.0344	0	0	0	0.2408	1829	0.2408	0	0	0
[15:52:09.089107] r = 275 EM = 1 __T__	275	14	164.143	0.022	0	0	0.0714	1.3076	2298	0.308	0	0	0.9996
[00:15:27.333713] r = 276 EM = 1 __T__	276	311	77.9534	0.1848	0.0997	0.1961	0.3505	258.472	24243.5	57.4728	31.0067	60.9871	109.005
[19:26:02.668125] r = 277 EM = 1 __T__	277	29	136.586	0.1111	0.069	0.069	0.2414	14.2245	3961	3.2219	2.001	2.001	7.0006
[21:42:51.181916] r = 278 EM = 1 __T__	278	3	154.667	0.3403	0.3333	0.3333	0.3333	4.0206	464	1.0209	0.9999	0.9999	0.9999
[18:54:31.478952] r = 279 EM = 1 __T__	279	48	37.2292	0.3077	0.1875	0.375	0.5625	68.7696	1787	14.7696	9	18	27
[16:11:22.328027] r = 280 EM = 1 __T__	280	11	1479.68	0.0269	0	0	0.0909	1.2958	16276.5	0.2959	0	0	0.9999
[14:09:55.909235] r = 281 EM = 1 __T__	281	11	1.2727	0.8636	0.7273	1	1	39.4999	13.9997	9.4996	8.0003	11	11
[15:00:13.961773] r = 282 EM = 1 __T__	282	16	2.0625	0.6615	0.4375	0.875	1	47.584	33	10.584	7	14	16
[17:16:01.871897] r = 283 EM = 1 __T__	283	19	116.158	0.2663	0.1579	0.3158	0.5263	24.0597	2207	5.0597	3.0001	6.0002	9.9997
[14:37:40.803539] r = 284 EM = 1 __T__	284	29	11.1724	0.2559	0.1379	0.2414	0.5172	33.4196	324	7.4211	3.9991	7.0006	14.9988
[15:00:58.145147] r = 285 EM = 1 __T__	285	23	2.3913	0.6859	0.5217	0.7826	1	68.7746	54.9999	15.7757	11.9991	17.9998	23
[19:02:06.630029] r = 286 EM = 1 __T__	286	40	21.775	0.1377	0.025	0.15	0.325	25.508	871	5.508	1	6	13
[17:01:23.740566] r = 287 EM = 1 __T__	287	152	111.671	0.1026	0.0592	0.0987	0.1579	63.5968	16974	15.5952	8.9984	15.0024	24.0008
[15:42:53.588835] r = 288 EM = 1 __T__	288	20	3.1	0.4867	0.25	0.95	0.95	52.734	62	9.734	5	19	19
[16:17:10.936816] r = 289 EM = 1 __T__	289	38	100.921	0.1619	0.0263	0.2368	0.3947	31.1486	3835	6.1522	0.9994	8.9984	14.9986
[14:32:26.241790] r = 290 EM = 1 __T__	290	13	4	0.2866	0	0.3846	1	21.7256	52	3.7258	0	4.9998	13
[18:10:22.109719] r = 291 EM = 1 __T__	291	10	109.3	0.0116	0	0	0	0.116	1093	0.116	0	0	0
[15:01:51.524230] r = 292 EM = 1 __T__	292	31	22.8065	0.0818	0	0	0.1935	8.5343	707.001	2.5358	0	0	5.9985
[14:49:53.945592] r = 293 EM = 1 __T__	293	17	7.2353	0.3743	0.1176	0.5882	0.8824	33.3625	123	6.3631	1.9992	9.9994	15.0008
[16:34:24.870934] r = 294 EM = 1 __T__	294	11	196.273	0.0386	0	0	0.0909	1.4245	2159	0.4246	0	0	0.9999
[18:59:48.780188] r = 295 EM = 1 __T__	295	402	2576.9	0.012	0.0075	0.0075	0.0075	13.869	1.03591e+06	4.824	3.015	3.015	3.015
[17:22:23.480250] r = 296 EM = 1 __T__	296	664	30.6265	0.4594	0.3313	0.5181	0.7139	1343.07	20336	305.042	219.983	344.018	474.03
[18:23:05.651079] r = 297 EM = 1 __T__	297	100	500.79	0.0438	0.01	0.05	0.12	22.38	50079	4.38	1	5	12
[16:57:07.565339] r = 298 EM = 1 __T__	298	55	11.3818	0.3024	0.1091	0.3455	0.7091	80.6355	625.999	16.632	6.0005	19.0025	39.0005
[15:17:24.821470] r = 299 EM = 1 __T__	299	77	158.182	0.0141	0	0	0	1.0857	12180	1.0857	0	0	0
[15:19:45.498156] r = 300 EM = 1 __T__	300	2	844	0.0012	0	0	0	0.0024	1688	0.0024	0	0	0
[16:34:15.023978] r = 301 EM = 1 __T__	301	0	0	0	0	0	0	0	0	0	0	0	0
[16:05:31.604774] r = 302 EM = 1 __T__	302	4	9.5	0.1062	0	0	1	4.4248	38	0.4248	0	0	4
[19:01:24.012687] r = 303 EM = 1 __T__	303	18	3.7778	0.5335	0.3333	0.7778	0.9444	46.602	68.0004	9.603	5.9994	14.0004	16.9992
[15:33:44.491962] r = 304 EM = 1 __T__	304	3	121	0.0178	0	0	0	0.0534	363	0.0534	0	0	0
[16:13:26.027973] r = 305 EM = 1 __T__	305	8	5.25	0.419	0.25	0.5	0.875	16.352	42	3.352	2	4	7
[19:23:54.338854] r = 306 EM = 1 __T__	306	3	6.6667	0.1528	0	0	1	3.4584	20.0001	0.4584	0	0	3
[15:50:35.253378] r = 307 EM = 1 __T__	307	25	9.56	0.3566	0.2	0.4	0.6	38.915	239	8.915	5	10	15
[16:45:20.202315] r = 308 EM = 1 __T__	308	53	1	1	1	1	1	212	53	53	53	53	53
[15:42:20.177397] r = 309 EM = 1 __T__	309	9	261	0.0438	0	0	0.2222	2.394	2349	0.3942	0	0	1.9998
[20:18:26.635512] r = 310 EM = 1 __T__	310	11	755.455	0.803	0.7273	0.9091	0.9091	36.8335	8310	8.833	8.0003	10.0001	10.0001
[21:18:55.185463] r = 311 EM = 1 __T__	311	1	33	0.0303	0	0	0	0.0303	33	0.0303	0	0	0
[21:53:49.697239] r = 312 EM = 1 __T__	312	1447	47.9454	0.1772	0.0726	0.1983	0.3932	1217.36	69377	256.408	105.052	286.94	568.96
[16:59:29.213836] r = 313 EM = 1 __T__	313	20	134.8	0.1723	0.1	0.25	0.3	16.446	2696	3.446	2	5	6
[11:04:30.905626] r = 314 EM = 1 __T__	314	10	3.1	0.4408	0.1	0.7	1	22.408	31	4.408	1	7	10
[21:39:07.591243] r = 315 EM = 1 __T__	315	0	0	0	0	0	0	0	0	0	0	0	0
[19:54:05.818786] r = 316 EM = 1 __T__	316	84	45.1786	0.0944	0.0357	0.0357	0.2738	36.9264	3795	7.9296	2.9988	2.9988	22.9992
[01:44:35.112033] r = 317 EM = 1 __T__	317	323	3.1238	0.7102	0.5789	0.8173	0.9628	991.352	1008.99	229.395	186.985	263.988	310.984
[03:08:26.734494] r = 318 EM = 1 __T__	318	98	838.133	0.0661	0.0204	0.0612	0.1429	28.4788	82137	6.4778	1.9992	5.9976	14.0042
[20:40:16.627446] r = 319 EM = 1 __T__	319	836	653.879	0.076	0.0395	0.0801	0.1519	290.51	546643	63.536	33.022	66.9636	126.988
[15:13:09.479332] r = 320 EM = 1 __T__	320	1	26	0.0385	0	0	0	0.0385	26	0.0385	0	0	0
[14:44:10.760843] r = 321 EM = 1 __T__	321	21	1.7619	0.6921	0.4286	0.9524	1	64.5351	36.9999	14.5341	9.0006	20.0004	21
[23:29:14.704923] r = 322 EM = 1 __T__	322	53	271.698	0.0408	0	0.0377	0.1132	10.1601	14400	2.1624	0	1.9981	5.9996
[15:32:26.556088] r = 323 EM = 1 __T__	323	92	339.207	0.0944	0.0543	0.1087	0.1848	40.6824	31207	8.6848	4.9956	10.0004	17.0016
[18:09:08.074707] r = 324 EM = 1 __T__	324	43	3.3953	0.4387	0.186	0.5814	1	94.8623	145.998	18.8641	7.998	25.0002	43
[17:12:50.677736] r = 325 EM = 1 __T__	325	321	104.234	0.1349	0.0779	0.134	0.2368	187.336	33459	43.3029	25.0059	43.014	76.0128
[14:18:45.475822] r = 326 EM = 1 __T__	326	17	7.5882	0.6155	0.5294	0.6471	0.7647	43.4639	128.999	10.4635	8.9998	11.0007	12.9999
[15:58:12.983129] r = 327 EM = 1 __T__	327	16	1.3125	0.8906	0.8125	0.9375	1	58.2496	21	14.2496	13	15	16
[14:06:28.950708] r = 328 EM = 1 __T__	328	27	2.4444	0.6896	0.5556	0.7407	1	80.6193	65.9988	18.6192	15.0012	19.9989	27
[19:19:27.707783] r = 329 EM = 1 __T__	329	9	308.889	0.1412	0	0.2222	0.3333	6.2703	2780	1.2708	0	1.9998	2.9997
[15:02:47.583378] r = 330 EM = 1 __T__	330	0	0	0	0	0	0	0	0	0	0	0	0
[21:41:06.138754] r = 331 EM = 1 __T__	331	10	222.2	0.1782	0.1	0.2	0.5	9.782	2222	1.782	1	2	5
[20:35:48.342706] r = 332 EM = 1 __T__	332	11	6.0909	0.2026	0	0.1818	1	15.2284	66.9999	2.2286	0	1.9998	11
[15:06:02.682583] r = 333 EM = 1 __T__	333	20	1.1	0.95	0.9	1	1	77	22	19	18	20	20
[14:54:28.812542] r = 334 EM = 1 __T__	334	80	85	0.0552	0	0.0375	0.1625	20.416	6800	4.416	0	3	13
[15:34:40.071511] r = 335 EM = 1 __T__	335	3	4.3333	0.4444	0.3333	0.3333	1	6.333	12.9999	1.3332	0.9999	0.9999	3
[21:07:02.006114] r = 336 EM = 1 __T__	336	4	120.5	0.0722	0	0	0.25	1.2888	482	0.2888	0	0	1
[20:05:54.596986] r = 337 EM = 1 __T__	337	2	1	1	1	1	1	8	2	2	2	2	2
[20:20:26.029338] r = 338 EM = 1 __T__	338	21	63.7143	0.0632	0	0.0476	0.1429	5.3277	1338	1.3272	0	0.9996	3.0009
[16:25:40.226639] r = 339 EM = 1 __T__	339	26	366.615	0.0281	0	0	0.1154	3.731	9532	0.7306	0	0	3.0004
[01:41:31.722203] r = 340 EM = 1 __T__	340	34	12.1176	0.3502	0.2059	0.4412	0.7059	57.9088	411.998	11.9068	7.0006	15.0008	24.0006
[20:07:58.585277] r = 341 EM = 1 __T__	341	1	20	0.05	0	0	0	0.05	20	0.05	0	0	0
[23:13:09.069043] r = 342 EM = 1 __T__	342	287	2.6272	0.679	0.5436	0.7596	0.9721	847.884	754.006	194.873	156.013	218.005	278.993
[19:31:10.771918] r = 343 EM = 1 __T__	343	20	54.35	0.3091	0.25	0.3	0.4	25.182	1087	6.182	5	6	8
[16:29:55.045765] r = 344 EM = 1 __T__	344	20	2.3	0.5125	0.15	0.85	1	50.25	46	10.25	3	17	20
[17:40:40.723321] r = 345 EM = 1 __T__	345	858	9.6876	0.3502	0.1678	0.4277	0.7378	1444.44	8311.96	300.472	143.972	366.967	633.032
[15:28:26.149416] r = 346 EM = 1 __T__	346	31	5.1613	0.4963	0.2903	0.6129	0.9032	71.3837	160	15.3853	8.9993	18.9999	27.9992
[20:26:49.896731] r = 347 EM = 1 __T__	347	251	8.0558	0.5037	0.3625	0.5618	0.7849	555.438	2022.01	126.429	90.9875	141.012	197.01
[15:41:26.978047] r = 348 EM = 1 __T__	348	606	167.04	0.0648	0.0248	0.0512	0.1386	169.316	101226	39.2688	15.0288	31.0272	83.9916
[15:28:06.193761] r = 349 EM = 1 __T__	349	12	1	1	1	1	1	48	12	12	12	12	12
[19:41:24.153805] r = 350 EM = 1 __T__	350	41	365.402	0.1381	0.0732	0.0976	0.3415	26.6664	14981.5	5.6621	3.0012	4.0016	14.0015
[20:06:33.370465] r = 351 EM = 1 __T__	351	131	221.725	0.0699	0.0382	0.0534	0.1298	38.1603	29046	9.1569	5.0042	6.9954	17.0038
[16:09:34.981699] r = 352 EM = 1 __T__	352	13	2654.77	0.0601	0	0.0769	0.0769	2.7807	34512	0.7813	0	0.9997	0.9997
[17:00:17.035843] r = 353 EM = 1 __T__	353	48	1	1	1	1	1	192	48	48	48	48	48
[16:02:57.854824] r = 354 EM = 1 __T__	354	70	1.2429	0.9112	0.8429	0.9714	1	260.785	87.003	63.784	59.003	67.998	70
[19:44:51.370255] r = 355 EM = 1 __T__	355	153	8.6993	0.4091	0.2222	0.4967	0.7778	291.587	1330.99	62.5923	33.9966	75.9951	119.003
[15:38:41.859331] r = 356 EM = 1 __T__	356	34	263.029	0.1943	0.0588	0.2353	0.5294	34.6052	8943	6.6062	1.9992	8.0002	17.9996
[15:43:50.628773] r = 357 EM = 1 __T__	357	60	333.383	0.1407	0.0333	0.1833	0.3833	44.436	20003	8.442	1.998	10.998	22.998
[17:10:06.559734] r = 358 EM = 1 __T__	358	53	16.3208	0.1797	0.0566	0.1321	0.4717	44.5253	865.002	9.5241	2.9998	7.0013	25.0001
[20:54:54.609558] r = 359 EM = 1 __T__	359	9	577.333	0.012	0	0	0	0.108	5196	0.108	0	0	0
[18:59:08.354189] r = 360 EM = 1 __T__	360	258	5.4031	0.5189	0.376	0.5775	0.8256	592.884	1394	133.876	97.008	148.995	213.005
[20:05:55.894798] r = 361 EM = 1 __T__	361	91	85.1868	0.2215	0.1319	0.2418	0.3846	89.1618	7752	20.1565	12.0029	22.0038	34.9986
[18:47:21.404721] r = 362 EM = 1 __T__	362	1067	170.209	0.0782	0.0159	0.059	0.2231	401.405	181614	83.4394	16.9653	62.953	238.048
[17:58:57.537675] r = 363 EM = 1 __T__	363	346	729.54	0.0114	0	0.0058	0.0202	12.9404	252421	3.9444	0	2.0068	6.9892
[15:43:30.733542] r = 364 EM = 1 __T__	364	12	324.583	0.0506	0	0	0.25	3.6072	3895	0.6072	0	0	3
[18:17:16.998432] r = 365 EM = 1 __T__	365	22	2.9545	0.5684	0.3636	0.6818	1	57.5036	64.999	12.5048	7.9992	14.9996	22
[17:10:20.686133] r = 366 EM = 1 __T__	366	121	24.843	0.4318	0.281	0.5207	0.7025	234.256	3006	52.2478	34.001	63.0047	85.0025
[19:53:40.365605] r = 367 EM = 1 __T__	367	53	100.868	0.3985	0.3019	0.4528	0.5283	89.1195	5346	21.1205	16.0007	23.9984	27.9999
[16:31:36.190748] r = 368 EM = 1 __T__	368	32	77.9688	0.1388	0.0312	0.125	0.3438	20.4416	2495	4.4416	0.9984	4	11.0016
[16:42:34.239356] r = 369 EM = 1 __T__	369	15	20.8	0.3308	0.2	0.4	0.5333	21.9615	312	4.962	3	6	7.9995
[20:42:25.017875] r = 370 EM = 1 __T__	370	32	138.469	0.2266	0.0938	0.2812	0.4375	33.2512	4431	7.2512	3.0016	8.9984	14
[16:20:07.262268] r = 371 EM = 1 __T__	371	29	19.069	0.4234	0.3103	0.5172	0.5862	53.2759	553.001	12.2786	8.9987	14.9988	16.9998
[17:19:01.255466] r = 372 EM = 1 __T__	372	94	31.0532	0.31	0.2021	0.3404	0.5745	134.138	2919	29.14	18.9974	31.9976	54.003
[16:14:15.097403] r = 373 EM = 1 __T__	373	63	2.3175	0.7159	0.5714	0.8413	0.9841	196.1	146.002	45.1017	35.9982	53.0019	61.9983
[20:47:38.368223] r = 374 EM = 1 __T__	374	7	367.857	0.3476	0.2857	0.4286	0.4286	10.4335	2575	2.4332	1.9999	3.0002	3.0002
[22:01:13.842268] r = 375 EM = 1 __T__	375	0	0	0	0	0	0	0	0	0	0	0	0
[22:44:58.159350] r = 376 EM = 1 __T__	376	16	1	1	1	1	1	64	16	16	16	16	16
[17:19:43.173345] r = 377 EM = 1 __T__	377	13	147.154	0.0838	0	0.1538	0.2308	6.0892	1913	1.0894	0	1.9994	3.0004
[11:29:20.011208] r = 378 EM = 1 __T__	378	16	1250.72	0.0699	0.0625	0.0625	0.0625	4.1184	20011.5	1.1184	1	1	1
[22:32:27.867278] r = 379 EM = 1 __T__	379	13	1	1	1	1	1	52	13	13	13	13	13
[20:51:30.978181] r = 380 EM = 1 __T__	380	26	206.885	0.1328	0.0769	0.1538	0.1923	14.4508	5379	3.4528	1.9994	3.9988	4.9998
[02:12:50.865083] r = 381 EM = 1 __T__	381	0	0	0	0	0	0	0	0	0	0	0	0
[03:56:56.916015] r = 382 EM = 1 __T__	382	38	21.2368	0.3407	0.2105	0.3947	0.6053	58.9456	806.998	12.9466	7.999	14.9986	23.0014
[22:11:40.524084] r = 383 EM = 1 __T__	383	11	113.091	0.3318	0.2727	0.2727	0.5455	15.6497	1244	3.6498	2.9997	2.9997	6.0005
[15:47:38.016557] r = 384 EM = 1 __T__	384	50	1627.66	0.0457	0	0.02	0.12	9.285	81383	2.285	0	1	6
[16:44:34.101382] r = 385 EM = 1 __T__	385	436	512.094	0.0493	0.0252	0.039	0.1032	94.4812	223273	21.4948	10.9872	17.004	44.9952
[00:17:32.833013] r = 386 EM = 1 __T__	386	78	1493.28	0.0215	0	0.0128	0.0769	8.6736	116476	1.677	0	0.9984	5.9982
[16:44:34.179593] r = 387 EM = 1 __T__	387	46	63.3261	0.0654	0	0.0217	0.3043	18.0044	2913	3.0084	0	0.9982	13.9978
[18:33:17.769570] r = 388 EM = 1 __T__	388	2	50.5	0.0198	0	0	0	0.0396	101	0.0396	0	0	0
[17:53:56.992361] r = 389 EM = 1 __T__	389	38	8.2105	0.5023	0.3684	0.5789	0.8158	86.0852	311.999	19.0874	13.9992	21.9982	31.0004
[14:38:20.364458] r = 390 EM = 1 __T__	390	10	1777.5	0.7001	0.7	0.7	0.7	28.001	17775	7.001	7	7	7
[16:27:54.770429] r = 391 EM = 1 __T__	391	11	832.864	0.1159	0	0.1818	0.2727	6.2744	9161.5	1.2749	0	1.9998	2.9997
[14:53:26.459438] r = 392 EM = 1 __T__	392	118	106.314	0.0903	0.0254	0.0932	0.2373	52.6516	12545	10.6554	2.9972	10.9976	28.0014
[19:53:42.992874] r = 393 EM = 1 __T__	393	11	36.8182	0.3524	0.2727	0.4545	0.4545	16.8751	405	3.8764	2.9997	4.9995	4.9995
[15:31:08.053192] r = 394 EM = 1 __T__	394	7	46	0.0862	0	0.1429	0.2857	3.6036	322	0.6034	0	1.0003	1.9999
[22:08:20.966570] r = 395 EM = 1 __T__	395	2	29.5	0.0493	0	0	0	0.0986	59	0.0986	0	0	0
[21:16:05.204208] r = 396 EM = 1 __T__	396	31	189.742	0.3256	0.2581	0.3548	0.4516	43.0931	5882	10.0936	8.0011	10.9988	13.9996
[15:28:25.532542] r = 397 EM = 1 __T__	397	0	0	0	0	0	0	0	0	0	0	0	0
[15:18:48.392016] r = 398 EM = 1 __T__	398	27	2	0.8531	0.7778	0.9259	0.963	95.0346	54	23.0337	21.0006	24.9993	26.001
[16:04:49.111658] r = 399 EM = 1 __T__	399	27	308.5	0.9025	0.8889	0.8889	0.963	98.3691	8329.5	24.3675	24.0003	24.0003	26.001
[21:40:40.820761] r = 400 EM = 1 __T__	400	3	24.3333	0.0781	0	0	0.3333	1.2342	72.9999	0.2343	0	0	0.9999
[20:37:12.904105] r = 401 EM = 1 __T__	401	21	4.1905	0.5251	0.3333	0.5714	0.9524	50.0262	88.0005	11.0271	6.9993	11.9994	20.0004
[20:39:07.454364] r = 402 EM = 1 __T__	402	0	0	0	0	0	0	0	0	0	0	0	0
[18:51:58.138507] r = 403 EM = 1 __T__	403	124	9.9113	0.6525	0.5484	0.7016	0.871	343.914	1229	80.91	68.0016	86.9984	108.004
[02:32:09.056913] r = 404 EM = 1 __T__	404	4	2	0.8	0.75	0.75	1	13.2	8	3.2	3	3	4
[21:33:11.678039] r = 405 EM = 1 __T__	405	94	290.085	0.2696	0.1383	0.2979	0.5851	121.345	27268	25.3424	13.0002	28.0026	54.9994
[00:04:36.421479] r = 406 EM = 1 __T__	406	9	323	0.1731	0.1111	0.1111	0.3333	6.5574	2907	1.5579	0.9999	0.9999	2.9997
[20:38:56.879822] r = 407 EM = 1 __T__	407	91	2.1758	0.7861	0.6813	0.8681	0.967	300.528	197.998	71.5351	61.9983	78.9971	87.997
[17:23:14.669310] r = 408 EM = 1 __T__	408	24	13.4167	0.2442	0	0.5	0.7917	36.8616	322.001	5.8608	0	12	19.0008
[19:35:18.389361] r = 409 EM = 1 __T__	409	31	120.677	0.2203	0.0645	0.2903	0.6129	36.828	3741	6.8293	1.9995	8.9993	18.9999
[16:31:28.052173] r = 410 EM = 1 __T__	410	235	46.3617	0.1856	0.0809	0.1915	0.4255	207.623	10895	43.616	19.0115	45.0025	99.9925
[22:02:45.810508] r = 411 EM = 1 __T__	411	46	1.087	0.9826	0.9783	0.9783	1	181.203	50.002	45.1996	45.0018	45.0018	46
[16:24:25.447149] r = 412 EM = 1 __T__	412	17	489.471	0.8143	0.7647	0.8235	0.9412	56.8429	8321	13.8431	12.9999	13.9995	16.0004
[16:00:28.141883] r = 413 EM = 1 __T__	413	117	1.5556	0.8853	0.8291	0.9402	0.9915	426.594	182.005	103.58	97.0047	110.003	116.006
[20:05:01.849780] r = 414 EM = 1 __T__	414	8	3.875	0.6101	0.5	0.75	0.875	21.8808	31	4.8808	4	6	7
[21:33:41.786087] r = 415 EM = 1 __T__	415	13	17.9231	0.2596	0.1538	0.2308	0.5385	15.3751	233	3.3748	1.9994	3.0004	7.0005
[18:35:38.916477] r = 416 EM = 1 __T__	416	317	8.9527	0.4985	0.3754	0.5331	0.7697	690.014	2838.01	158.024	119.002	168.993	243.995
[17:39:45.381597] r = 417 EM = 1 __T__	417	0	0	0	0	0	0	0	0	0	0	0	0
[16:48:41.279682] r = 418 EM = 1 __T__	418	14	225.5	0.0921	0	0.1429	0.2143	6.2902	3157	1.2894	0	2.0006	3.0002
[20:53:17.136195] r = 419 EM = 1 __T__	419	13	1	1	1	1	1	52	13	13	13	13	13
[16:01:38.404073] r = 420 EM = 1 __T__	420	43	55.9302	0.1851	0.093	0.186	0.3721	35.9566	2405	7.9593	3.999	7.998	16.0003
[16:13:11.084459] r = 421 EM = 1 __T__	421	41	5.0488	0.3674	0.1707	0.4878	0.9024	79.0603	207.001	15.0634	6.9987	19.9998	36.9984
[17:48:47.611586] r = 422 EM = 1 __T__	422	11	17	0.1731	0	0.2727	0.3636	8.9034	187	1.9041	0	2.9997	3.9996
[01:38:44.074406] r = 423 EM = 1 __T__	423	494	923.656	0.0597	0.0263	0.0648	0.1073	127.501	456286	29.4918	12.9922	32.0112	53.0062
[21:31:13.998248] r = 424 EM = 1 __T__	424	158	100.924	0.0303	0	0.0127	0.0823	19.7974	15946	4.7874	0	2.0066	13.0034
[20:52:17.932315] r = 425 EM = 1 __T__	425	39	343.18	0.0479	0.0256	0.0256	0.0769	6.864	13384	1.8681	0.9984	0.9984	2.9991
[19:53:18.247537] r = 426 EM = 1 __T__	426	9	71.2222	0.1889	0.1111	0.1111	0.4444	7.6995	641	1.7001	0.9999	0.9999	3.9996
[19:24:16.758509] r = 427 EM = 1 __T__	427	30	1.4	0.8986	0.8333	0.9667	1	110.958	42	26.958	24.999	29.001	30
[16:10:41.427103] r = 428 EM = 1 __T__	428	17	240.235	0.1265	0.0588	0.1176	0.2353	9.1494	4084	2.1505	0.9996	1.9992	4.0001
[18:57:11.871405] r = 429 EM = 1 __T__	429	9	649.667	0.0024	0	0	0	0.0216	5847	0.0216	0	0	0
[17:59:37.009593] r = 430 EM = 1 __T__	430	25	90.44	0.1522	0	0.04	0.84	25.805	2261	3.805	0	1	21
[20:32:07.734818] r = 431 EM = 1 __T__	431	97	49.7732	0.2062	0.1134	0.2165	0.3918	90.0063	4828	20.0014	10.9998	21.0005	38.0046
[17:12:38.983727] r = 432 EM = 1 __T__	432	42	5.5	0.3664	0.1905	0.4048	0.8333	75.39	231	15.3888	8.001	17.0016	34.9986
[17:14:37.179901] r = 433 EM = 1 __T__	433	60	38.6667	0.2919	0.1	0.4333	0.7167	92.514	2320	17.514	6	25.998	43.002
[21:30:17.067102] r = 434 EM = 1 __T__	434	137	335.88	0.1277	0.0657	0.1022	0.2847	79.5011	46015.5	17.4949	9.0009	14.0014	39.0039
[16:52:04.133630] r = 435 EM = 1 __T__	435	63	13.4921	0.223	0.0635	0.2381	0.6349	73.0485	850.002	14.049	4.0005	15.0003	39.9987
[20:00:52.995051] r = 436 EM = 1 __T__	436	160	15.15	0.388	0.2375	0.4563	0.7125	287.088	2424	62.08	38	73.008	114
[16:44:31.108850] r = 437 EM = 1 __T__	437	8	6.25	0.5624	0.5	0.5	0.75	18.4992	50	4.4992	4	4	6
[21:40:12.661252] r = 438 EM = 1 __T__	438	55	406.945	0.0963	0.0364	0.1091	0.2	24.299	22382	5.2965	2.002	6.0005	11
[22:55:51.778962] r = 439 EM = 1 __T__	439	16	14.0625	0.4057	0.25	0.5	0.75	30.4912	225	6.4912	4	8	12
[23:42:36.006115] r = 440 EM = 1 __T__	440	1	351	0.0028	0	0	0	0.0028	351	0.0028	0	0	0
[18:56:51.352647] r = 441 EM = 1 __T__	441	266	119.882	0.2602	0.1391	0.2782	0.5338	322.206	31888.5	69.2132	37.0006	74.0012	141.991
[12:16:14.631218] r = 442 EM = 1 __T__	442	85	101.282	0.5114	0.3176	0.5882	0.9412	200.464	8609	43.469	26.996	49.997	80.002
[23:01:42.023926] r = 443 EM = 1 __T__	443	6	28.6667	0.2178	0	0.3333	0.5	6.3066	172	1.3068	0	1.9998	3
[21:21:09.202639] r = 444 EM = 1 __T__	444	9	24.3333	0.053	0	0	0	0.477	219	0.477	0	0	0
[02:42:57.803049] r = 445 EM = 1 __T__	445	0	0	0	0	0	0	0	0	0	0	0	0
[04:26:33.462732] r = 446 EM = 1 __T__	446	7	1.1429	0.9286	0.8571	1	1	26.4999	8.0003	6.5002	5.9997	7	7
[22:48:55.516925] r = 447 EM = 1 __T__	447	7	45.2857	0.096	0	0.1429	0.2857	3.6722	317	0.672	0	1.0003	1.9999
[16:09:36.940046] r = 448 EM = 1 __T__	448	16	12	0.4029	0.3125	0.375	0.625	27.4464	192	6.4464	5	6	10
[17:47:52.918871] r = 449 EM = 1 __T__	449	20	20.7	0.2447	0.15	0.25	0.4	20.894	414	4.894	3	5	8
[00:46:58.407025] r = 450 EM = 1 __T__	450	127	1435.13	0.0226	0	0.0157	0.0709	13.8684	182261	2.8702	0	1.9939	9.0043
[18:00:05.185164] r = 451 EM = 1 __T__	451	5	89.4	0.018	0	0	0	0.09	447	0.09	0	0	0
[22:05:45.230530] r = 452 EM = 1 __T__	452	214	20.1916	0.3281	0.0981	0.486	0.7991	366.218	4321	70.2134	20.9934	104.004	171.007
[18:39:07.798920] r = 453 EM = 1 __T__	453	167	6.5509	0.5765	0.4192	0.6826	0.8503	422.276	1094	96.2755	70.0064	113.994	142
[15:01:20.755115] r = 454 EM = 1 __T__	454	0	0	0	0	0	0	0	0	0	0	0	0
[16:52:44.888045] r = 455 EM = 1 __T__	455	18	253.667	0.0706	0	0.1111	0.1667	6.2712	4566	1.2708	0	1.9998	3.0006
[15:42:06.806248] r = 456 EM = 1 __T__	456	4	11.25	0.1016	0	0	0.75	3.4064	45	0.4064	0	0	3
[20:08:45.476901] r = 457 EM = 1 __T__	457	3	1	1	1	1	1	12	3	3	3	3	3
[16:13:04.631948] r = 458 EM = 1 __T__	458	34	14.5588	0.3061	0.1765	0.3529	0.5294	46.4066	494.999	10.4074	6.001	11.9986	17.9996
[22:41:11.081518] r = 459 EM = 1 __T__	459	0	0	0	0	0	0	0	0	0	0	0	0
[21:41:32.573222] r = 460 EM = 1 __T__	460	3	2	0.6111	0.3333	1	1	8.8332	6	1.8333	0.9999	3	3
[16:33:33.611120] r = 461 EM = 1 __T__	461	77	811.383	0.3453	0.2078	0.4156	0.6104	121.591	62476.5	26.5881	16.0006	32.0012	47.0008
[16:29:43.161215] r = 462 EM = 1 __T__	462	12	115.833	0.0092	0	0	0	0.1104	1390	0.1104	0	0	0
[16:28:55.707741] r = 463 EM = 1 __T__	463	13	35.3846	0.4398	0.2308	0.6154	0.7692	26.7176	460	5.7174	3.0004	8.0002	9.9996
[22:15:37.722598] r = 464 EM = 1 __T__	464	0	0	0	0	0	0	0	0	0	0	0	0
[21:14:53.366757] r = 465 EM = 1 __T__	465	35	2451.61	0.0524	0.0286	0.0571	0.1143	8.834	85806.5	1.834	1.001	1.9985	4.0005
[21:11:51.345798] r = 466 EM = 1 __T__	466	20	859.4	0.3917	0.3	0.4	0.65	34.834	17188	7.834	6	8	13
[19:57:29.996621] r = 467 EM = 1 __T__	467	96	17.4688	0.3371	0.0938	0.5208	0.7292	161.366	1677	32.3616	9.0048	49.9968	70.0032
[03:03:40.728417] r = 468 EM = 1 __T__	468	5	1.2	0.9	0.8	1	1	18.5	6	4.5	4	5	5
[22:11:57.153888] r = 469 EM = 1 __T__	469	16	85.6875	0.1058	0.0625	0.0625	0.3125	8.6928	1371	1.6928	1	1	5
[00:40:50.638581] r = 470 EM = 1 __T__	470	84	158.81	0.2325	0.1667	0.25	0.3571	84.5292	13340	19.53	14.0028	21	29.9964
[22:15:04.989517] r = 471 EM = 1 __T__	471	60	826.392	0.0247	0	0.0167	0.05	5.484	49583.5	1.482	0	1.002	3
[18:00:18.561626] r = 472 EM = 1 __T__	472	15	9	0.4826	0.3333	0.5333	0.8667	33.2385	135	7.239	4.9995	7.9995	13.0005
[19:56:41.193468] r = 473 EM = 1 __T__	473	3	382.667	0.1713	0	0.3333	0.3333	2.5137	1148	0.5139	0	0.9999	0.9999

## Sheet: wn18rr
rubbish	r	#test	mr	mrr	h1	h3	h10
[15:12:19.239338] r = 0 EM = # __T__	0	1251	7061.32	0.2429	0.1839	0.2614	0.3645		8.83371e+06	303.868	230.059	327.011	455.989		P2	Result Calculation					V2
[13:49:28.018145] r = 1 EM = # __T__	1	1074	90.925	0.9545	0.9469	0.96	0.9674		97653.4	1025.13	1016.97	1031.04	1038.99		Name=	wn18rr rules=800 embed_dim=200 maxlen=5
[04:37:41.784702] r = 2 EM = # __T__	2	122	2537.86	0.4995	0.3525	0.6148	0.7869		309619	60.939	43.005	75.0056	96.0018		E=	11	← Fill this !!!
[01:06:46.637418] r = 3 EM = # __T__	3	56	3244.78	0.609	0.5893	0.625	0.6429		181708	34.104	33.0008	35	36.0024		Cols=	C	J	K	L	M	N
[06:41:30.087184] r = 4 EM = # __T__	4	253	2258.62	0.1193	0.0672	0.1225	0.2134		571432	30.1829	17.0016	30.9925	53.9902		Tmp=	3134	1.18056e+07	1588.08	1452.04	1640.05	1854.97
[05:32:53.036693] r = 5 EM = # __T__	5	114	2319.94	0.5671	0.5	0.6053	0.6842		264473	64.6494	57	69.0042	77.9988			3134	1.71228e+07	1442.33	1340.97	1477.03	1640.05
[04:13:03.869085] r = 6 EM = # __T__	6	172	5488.43	0.1538	0.0814	0.1686	0.2965		944010	26.4536	14.0008	28.9992	50.998			6268	2.89284e+07	3030.41	2793.01	3117.08	3495.02
[23:43:45.132793] r = 7 EM = # __T__	7	24	12484.7	0.0168	0	0	0.0417		299632	0.4032	0	0	1.0008		Result=
[23:53:24.873574] r = 8 EM = # __T__	8	26	11666.9	0.0518	0.0385	0.0385	0.0769		303338	1.3468	1.001	1.001	1.9994			3766.95	0.506727	0.463318	0.52331	0.591885
[01:45:26.133537] r = 9 EM = # __T__	9	39	1.0513	0.9744	0.9487	1	1		41.0007	38.0016	36.9993	39	39			5463.55	0.460221	0.427878	0.471291	0.523309
[23:31:16.139453] r = 10 EM = # __T__	10	3	1	1	1	1	1		3	3	3	3	3			4615.25	0.483474	0.445598	0.497301	0.557597
[12:43:00.097218] r = 11 EM = # __T__	11	1251	11315.4	0.1064	0.0711	0.1143	0.1775		1.41555e+07	133.106	88.9461	142.989	222.052
[14:15:39.368269] r = 12 EM = # __T__	12	1074	94.3952	0.9577	0.9516	0.9628	0.9674		101380	1028.57	1022.02	1034.05	1038.99
[01:00:26.589591] r = 13 EM = # __T__	13	122	4056.84	0.1865	0.1475	0.1803	0.2951		494934	22.753	17.995	21.9966	36.0022
[01:49:31.689180] r = 14 EM = # __T__	14	56	2373.87	0.6848	0.6429	0.7143	0.75		132936	38.3488	36.0024	40.0008	42
[12:20:32.003265] r = 15 EM = # __T__	15	253	1695.41	0.3611	0.2688	0.4071	0.5178		428938	91.3583	68.0064	102.996	131.003
[01:03:46.252452] r = 16 EM = # __T__	16	114	7714.89	0.1681	0.114	0.1667	0.2895		879497	19.1634	12.996	19.0038	33.003
[09:09:31.485562] r = 17 EM = # __T__	17	172	4722.43	0.268	0.1977	0.3081	0.4128		812258	46.096	34.0044	52.9932	71.0016
[01:14:25.110249] r = 18 EM = # __T__	18	24	2153.6	0.4448	0.4167	0.4583	0.5		51686.5	10.6752	10.0008	10.9992	12
[01:44:20.575035] r = 19 EM = # __T__	19	26	2522.02	0.4139	0.3846	0.3846	0.4615		65572.5	10.7614	9.9996	9.9996	11.999
[02:14:48.062562] r = 20 EM = # __T__	20	39	1.0256	0.9872	0.9744	1	1		39.9984	38.5008	38.0016	39	39
[00:01:46.576280] r = 21 EM = # __T__	21	3	1	1	1	1	1		3	3	3	3	3

## Sheet: umls
rubbish	r	#test	mr	mrr	h1	h3	h10
[15:58:26.955309] r = 0 EM = # __T__	0	150	2.92	0.8384	0.8067	0.84	0.9133		438	125.76	121.005	126	136.995		P2	Result Calculation					V2
[16:09:30.230740] r = 1 EM = # __T__	1	86	1.3721	0.9232	0.8721	0.9767	0.9884		118.001	79.3952	75.0006	83.9962	85.0024		Name=	umls 325 rules=1000 embed_dim=default maxlen=3
[16:33:26.954274] r = 2 EM = # __T__	2	246	9.6667	0.6531	0.5244	0.752	0.878		2378.01	160.663	129.002	184.992	215.988		E=	46	← Fill this !!!
[16:48:36.984035] r = 3 EM = # __T__	3	528	2.2216	0.7602	0.6458	0.8182	0.983		1173	401.386	340.982	432.01	519.024		Cols=	C	J	K	L	M	N
[17:03:30.477753] r = 4 EM = # __T__	4	115	1.5913	0.9262	0.9043	0.9391	0.9826		182.999	106.513	103.995	107.997	112.999		Tmp=	3252	10138	2737.21	2525.96	2883.98	3144.02
[17:16:06.996429] r = 5 EM = # __T__	5	227	1.7093	0.7801	0.6476	0.9031	1		388.011	177.083	147.005	205.004	227			3252	9736.98	2736.32	2494.99	2913.01	3134.02
[17:38:26.886727] r = 6 EM = # __T__	6	282	1.7199	0.9475	0.9255	0.9645	0.9894		485.012	267.195	260.991	271.989	279.011			6504	19875	5473.53	5020.96	5796.99	6278.04
[17:49:46.361344] r = 7 EM = # __T__	7	143	1.1399	0.9746	0.965	0.979	0.993		163.006	139.368	137.995	139.997	141.999		Result=
[17:59:52.597293] r = 8 EM = # __T__	8	38	1.7895	0.9507	0.9474	0.9474	0.9474		68.001	36.1266	36.0012	36.0012	36.0012			3.11748	0.841699	0.776742	0.886834	0.966795
[18:10:56.380974] r = 9 EM = # __T__	9	30	12.0667	0.8243	0.8	0.8	0.9		362.001	24.729	24	24	27			2.99415	0.841427	0.767218	0.895759	0.963721
[18:22:10.061675] r = 10 EM = # __T__	10	154	1.2922	0.9495	0.9221	0.974	0.9935		198.999	146.223	142.003	149.996	152.999			3.05581	0.841563	0.77198	0.891296	0.965258
[18:31:36.634057] r = 11 EM = # __T__	11	17	1.3529	0.9137	0.8824	0.9412	1		22.9993	15.5329	15.0008	16.0004	17
Skipped # __T__	12	0	0	0	0	0	0		0	0	0	0	0
[09:12:06.847596] r = 13 EM = # __T__	13	223	2.1076	0.8716	0.8161	0.9327	0.9955		469.995	194.367	181.99	207.992	221.996
[09:21:37.897280] r = 14 EM = # __T__	14	37	2.3784	0.6723	0.5135	0.7568	1		88.0008	24.8751	18.9995	28.0016	37
[09:31:23.529822] r = 15 EM = # __T__	15	71	3.0704	0.7902	0.7183	0.831	0.9296		217.998	56.1042	50.9993	59.001	66.0016
[09:48:33.259042] r = 16 EM = # __T__	16	155	1	1	1	1	1		155	155	155	155	155
[09:58:44.351336] r = 17 EM = # __T__	17	74	1.2703	0.967	0.9459	0.9865	0.9865		94.0022	71.558	69.9966	73.001	73.001
[10:08:12.198102] r = 18 EM = # __T__	18	80	2.4125	0.6797	0.5125	0.875	0.9625		193	54.376	41	70	77
[10:17:45.861692] r = 19 EM = # __T__	19	11	1.1818	0.9394	0.9091	1	1		12.9998	10.3334	10.0001	11	11
[10:31:09.516337] r = 20 EM = # __T__	20	183	1.1421	0.9673	0.9508	0.9727	1		209.004	177.016	173.996	178.004	183
[10:40:23.619963] r = 21 EM = # __T__	21	12	1.9167	0.9236	0.9167	0.9167	0.9167		23.0004	11.0832	11.0004	11.0004	11.0004
[10:49:40.743063] r = 22 EM = # __T__	22	29	4.2759	0.8613	0.8276	0.8966	0.8966		124.001	24.9777	24.0004	26.0014	26.0014
[11:01:24.384688] r = 23 EM = # __T__	23	35	3.8571	0.5955	0.5143	0.5143	0.9714		134.999	20.8425	18.0005	18.0005	33.999
[11:10:45.061883] r = 24 EM = # __T__	24	27	1.0741	0.963	0.9259	1	1		29.0007	26.001	24.9993	27	27
[11:20:15.408998] r = 25 EM = # __T__	25	26	1	1	1	1	1		26	26	26	26	26
[11:21:40.365134] r = 26 EM = # __T__	26	14	1	1	1	1	1		14	14	14	14	14
[11:30:51.333552] r = 27 EM = # __T__	27	18	8.6111	0.8406	0.8333	0.8333	0.8333		155	15.1308	14.9994	14.9994	14.9994
[11:33:44.398981] r = 28 EM = # __T__	28	4	3.25	0.475	0.25	0.5	1		13	1.9	1	2	4
[11:42:07.834179] r = 29 EM = # __T__	29	33	2.9091	0.7111	0.5758	0.8182	0.9091		96.0003	23.4663	19.0014	27.0006	30.0003
[11:50:30.716255] r = 30 EM = # __T__	30	15	1.3333	0.9444	0.9333	0.9333	1		19.9995	14.166	13.9995	13.9995	15
[12:00:45.668785] r = 31 EM = # __T__	31	31	16.5484	0.5084	0.3871	0.6452	0.7742		513	15.7604	12.0001	20.0012	24.0002
[12:10:35.672027] r = 32 EM = # __T__	32	45	4.6444	0.9169	0.9111	0.9111	0.9333		208.998	41.2605	40.9995	40.9995	41.9985
[12:13:30.141521] r = 33 EM = # __T__	33	6	3.6667	0.5819	0.5	0.5	1		22.0002	3.4914	3	3	6
[12:22:59.729716] r = 34 EM = # __T__	34	39	1.2051	0.9231	0.8718	1	1		46.9989	36.0009	34.0002	39	39
[12:31:01.413117] r = 35 EM = # __T__	35	12	89.8333	0.0505	0	0.0833	0.1667		1078	0.606	0	0.9996	2.0004
[12:39:21.497064] r = 36 EM = # __T__	36	27	3.037	0.5938	0.4815	0.5926	1		81.999	16.0326	13.0005	16.0002	27
[12:48:26.304417] r = 37 EM = # __T__	37	18	1.1667	0.9583	0.9444	0.9444	1		21.0006	17.2494	16.9992	16.9992	18
[12:51:20.142799] r = 38 EM = # __T__	38	2	2	0.5	0	1	1		4	1	0	2	2
[12:54:20.849185] r = 39 EM = # __T__	39	7	14.1429	0.5939	0.5714	0.5714	0.7143		99.0003	4.1573	3.9998	3.9998	5.0001
[12:54:21.214918] r = 40 EM = # Skipped # __T__	40	0	0	0	0	0	0		0	0	0	0	0
[12:54:21.215020] r = 41 EM = # Skipped # __T__	41	0	0	0	0	0	0		0	0	0	0	0
[12:57:26.493345] r = 42 EM = # __T__	42	0	0	0	0	0	0		0	0	0	0	0
[13:05:32.664003] r = 43 EM = # __T__	43	2	5	0.2381	0	0.5	1		10	0.4762	0	1	2
[13:05:34.028946] r = 44 EM = # Skipped # __T__	44	0	0	0	0	0	0		0	0	0	0	0
[13:05:34.029045] r = 45 EM = # Skipped # __T__	45	0	0	0	0	0	0		0	0	0	0	0
[13:17:58.513991] r = 46 EM = # __T__	46	150	1.84	0.847	0.76	0.92	0.9867		276	127.05	114	138	148.005
[13:30:26.337764] r = 47 EM = # __T__	47	86	2.6047	0.9079	0.8837	0.9302	0.9651		224.004	78.0794	75.9982	79.9972	82.9986
[13:42:56.217402] r = 48 EM = # __T__	48	246	12.065	0.5446	0.4146	0.6098	0.7724		2967.99	133.972	101.992	150.011	190.01
[13:59:04.909745] r = 49 EM = # __T__	49	528	2.2159	0.7832	0.6269	0.911	0.9811		1170	413.53	331.003	481.008	518.021
[14:13:30.336403] r = 50 EM = # __T__	50	115	1.1217	0.9645	0.9478	0.9739	1		128.995	110.918	108.997	111.998	115
[14:25:48.149955] r = 51 EM = # __T__	51	227	2.5286	0.6659	0.5198	0.7401	0.9824		573.992	151.159	117.995	168.003	223.005
[14:47:04.545395] r = 52 EM = # __T__	52	282	3.6241	0.8664	0.8085	0.9113	0.9574		1022	244.325	227.997	256.987	269.987
[14:57:30.345995] r = 53 EM = # __T__	53	143	1.1049	0.9575	0.9231	0.993	1		158.001	136.923	132.003	141.999	143
[15:07:52.992037] r = 54 EM = # __T__	54	38	2.4737	0.8767	0.8421	0.8947	0.9474		94.0006	33.3146	31.9998	33.9986	36.0012
[15:16:52.255730] r = 55 EM = # __T__	55	30	3.3	0.9021	0.8667	0.9333	0.9333		99	27.063	26.001	27.999	27.999
[15:28:25.585628] r = 56 EM = # __T__	56	154	2.3831	0.7378	0.6169	0.8506	0.974		366.997	113.621	95.0026	130.992	149.996
[15:30:14.980896] r = 57 EM = # __T__	57	17	2.0588	0.8953	0.8824	0.8824	0.9412		34.9996	15.2201	15.0008	15.0008	16.0004
[15:30:15.049920] r = 58 EM = # Skipped # __T__	58	0	0	0	0	0	0		0	0	0	0	0
[15:42:34.953973] r = 59 EM = # __T__	59	223	1.5426	0.8665	0.7982	0.9283	0.9955		344	193.23	177.999	207.011	221.996
[15:54:46.988761] r = 60 EM = # __T__	60	37	1.5135	0.9263	0.8919	0.9459	0.973		55.9995	34.2731	33.0003	34.9983	36.001
[16:08:31.000793] r = 61 EM = # __T__	61	71	1	1	1	1	1		71	71	71	71	71
[16:20:46.873377] r = 62 EM = # __T__	62	155	1	1	1	1	1		155	155	155	155	155
[16:36:28.914029] r = 63 EM = # __T__	63	74	1.1081	0.9505	0.9054	1	1		81.9994	70.337	66.9996	74	74
[16:50:07.361892] r = 64 EM = # __T__	64	80	1	1	1	1	1		80	80	80	80	80
[16:59:40.300701] r = 65 EM = # __T__	65	11	1.1818	0.9394	0.9091	1	1		12.9998	10.3334	10.0001	11	11
[17:09:20.703403] r = 66 EM = # __T__	66	183	1.1913	0.9588	0.9399	0.9727	1		218.008	175.46	172.002	178.004	183
[17:11:34.305508] r = 67 EM = # __T__	67	12	1	1	1	1	1		12	12	12	12	12
[17:23:57.373633] r = 68 EM = # __T__	68	29	1	1	1	1	1		29	29	29	29	29
[17:34:41.875898] r = 69 EM = # __T__	69	35	1.4286	0.881	0.8286	0.8857	1		50.001	30.835	29.001	30.9995	35
[17:44:24.521876] r = 70 EM = # __T__	70	27	1.1111	0.9722	0.963	0.963	1		29.9997	26.2494	26.001	26.001	27
[17:52:29.537591] r = 71 EM = # __T__	71	26	2.3077	0.8132	0.7308	0.8846	0.9615		60.0002	21.1432	19.0008	22.9996	24.999
[18:00:19.161275] r = 72 EM = # __T__	72	14	3	0.8338	0.7857	0.8571	0.9286		42	11.6732	10.9998	11.9994	13.0004
[18:09:24.328283] r = 73 EM = # __T__	73	18	15.2778	0.8897	0.8889	0.8889	0.8889		275	16.0146	16.0002	16.0002	16.0002
[18:12:15.948856] r = 74 EM = # __T__	74	4	1	1	1	1	1		4	4	4	4	4
[18:24:28.602051] r = 75 EM = # __T__	75	33	1	1	1	1	1		33	33	33	33	33
[18:32:51.340786] r = 76 EM = # __T__	76	15	9.8667	0.5185	0.4	0.6	0.8		148	7.7775	6	9	12
[18:46:03.542117] r = 77 EM = # __T__	77	31	4.9032	0.968	0.9677	0.9677	0.9677		151.999	30.008	29.9987	29.9987	29.9987
[18:57:39.266664] r = 78 EM = # __T__	78	45	1.4889	0.9622	0.9556	0.9556	0.9778		67.0005	43.299	43.002	43.002	44.001
[19:00:37.981085] r = 79 EM = # __T__	79	6	1	1	1	1	1		6	6	6	6	6
[19:10:21.261678] r = 80 EM = # __T__	80	39	1	1	1	1	1		39	39	39	39	39
[19:22:18.542115] r = 81 EM = # __T__	81	12	44.1667	0.1594	0.0833	0.1667	0.25		530	1.9128	0.9996	2.0004	3
[19:33:14.753675] r = 82 EM = # __T__	82	27	1	1	1	1	1		27	27	27	27	27
[19:41:42.424602] r = 83 EM = # __T__	83	18	1.3889	0.8722	0.7778	0.9444	1		25.0002	15.6996	14.0004	16.9992	18
[19:44:30.791572] r = 84 EM = # __T__	84	2	1	1	1	1	1		2	2	2	2	2
[19:47:23.991222] r = 85 EM = # __T__	85	7	9.1429	0.6003	0.5714	0.5714	0.7143		64.0003	4.2021	3.9998	3.9998	5.0001
[19:47:24.346753] r = 86 EM = # Skipped # __T__	86	0	0	0	0	0	0		0	0	0	0	0
[19:47:24.346862] r = 87 EM = # Skipped # __T__	87	0	0	0	0	0	0		0	0	0	0	0
[19:50:29.338013] r = 88 EM = # __T__	88	0	0	0	0	0	0		0	0	0	0	0
[19:58:33.348124] r = 89 EM = # __T__	89	2	3.5	0.35	0	0.5	1		7	0.7	0	1	2
[19:58:34.620200] r = 90 EM = # Skipped # __T__	90	0	0	0	0	0	0		0	0	0	0	0
[19:58:34.620302] r = 91 EM = # Skipped # __T__	91	0	0	0	0	0	0		0	0	0	0	0
									0	0	0	0	0
									0	0	0	0	0
									0	0	0	0	0
									0	0	0	0	0
									0	0	0	0	0
									0	0	0	0	0
									0	0	0	0	0
									0	0	0	0	0
									0	0	0	0	0
									0	0	0	0	0
									0	0	0	0	0
									0	0	0	0	0
									0	0	0	0	0
									0	0	0	0	0
									0	0	0	0	0
									0	0	0	0	0
									0	0	0	0	0
									0	0	0	0	0
									0	0	0	0	0
									0	0	0	0	0
									0	0	0	0	0
									0	0	0	0	0
									0	0	0	0	0
									0	0	0	0	0
									0	0	0	0	0
									0	0	0	0	0
									0	0	0	0	0
									0	0	0	0	0
									0	0	0	0	0
									0	0	0	0	0
									0	0	0	0	0
									0	0	0	0	0
									0	0	0	0	0
									0	0	0	0	0
									0	0	0	0	0
									0	0	0	0	0
									0	0	0	0	0
									0	0	0	0	0
									0	0	0	0	0
									0	0	0	0	0
									0	0	0	0	0
									0	0	0	0	0
									0	0	0	0	0
									0	0	0	0	0
									0	0	0	0	0
									0	0	0	0	0
									0	0	0	0	0
									0	0	0	0	0
									0	0	0	0	0
									0	0	0	0	0
									0	0	0	0	0
									0	0	0	0	0
									0	0	0	0	0
									0	0	0	0	0
									0	0	0	0	0
									0	0	0	0	0
									0	0	0	0	0
									0	0	0	0	0
									0	0	0	0	0
									0	0	0	0	0
									0	0	0	0	0
									0	0	0	0	0
									0	0	0	0	0
									0	0	0	0	0
									0	0	0	0	0
									0	0	0	0	0
									0	0	0	0	0
									0	0	0	0	0
									0	0	0	0	0
									0	0	0	0	0
									0	0	0	0	0
									0	0	0	0	0
									0	0	0	0	0
									0	0	0	0	0
									0	0	0	0	0
									0	0	0	0	0
									0	0	0	0	0
									0	0	0	0	0
									0	0	0	0	0
									0	0	0	0	0
									0	0	0	0	0
									0	0	0	0	0
									0	0	0	0	0
									0	0	0	0	0
									0	0	0	0	0
									0	0	0	0	0
									0	0	0	0	0
									0	0	0	0	0
									0	0	0	0	0
									0	0	0	0	0
									0	0	0	0	0
									0	0	0	0	0
									0	0	0	0	0
									0	0	0	0	0
									0	0	0	0	0
									0	0	0	0	0
									0	0	0	0	0
									0	0	0	0	0
									0	0	0	0	0
									0	0	0	0	0
									0	0	0	0	0
									0	0	0	0	0
									0	0	0	0	0
									0	0	0	0	0
									0	0	0	0	0
									0	0	0	0	0
									0	0	0	0	0
									0	0	0	0	0
									0	0	0	0	0
									0	0	0	0	0
									0	0	0	0	0
									0	0	0	0	0
									0	0	0	0	0
									0	0	0	0	0
									0	0	0	0	0
									0	0	0	0	0
									0	0	0	0	0
									0	0	0	0	0
									0	0	0	0	0
									0	0	0	0	0
									0	0	0	0	0
									0	0	0	0	0
									0	0	0	0	0
									0	0	0	0	0
									0	0	0	0	0
									0	0	0	0	0
									0	0	0	0	0
									0	0	0	0	0
									0	0	0	0	0
									0	0	0	0	0
									0	0	0	0	0
									0	0	0	0	0
									0	0	0	0	0
									0	0	0	0	0
									0	0	0	0	0
									0	0	0	0	0
									0	0	0	0	0
									0	0	0	0	0
									0	0	0	0	0
									0	0	0	0	0
									0	0	0	0	0
									0	0	0	0	0
									0	0	0	0	0
									0	0	0	0	0
									0	0	0	0	0
									0	0	0	0	0
									0	0	0	0	0
									0	0	0	0	0
									0	0	0	0	0
									0	0	0	0	0
									0	0	0	0	0
									0	0	0	0	0
									0	0	0	0	0
									0	0	0	0	0
									0	0	0	0	0
									0	0	0	0	0
									0	0	0	0	0
									0	0	0	0	0
									0	0	0	0	0
									0	0	0	0	0
									0	0	0	0	0
									0	0	0	0	0
									0	0	0	0	0
									0	0	0	0	0
									0	0	0	0	0
									0	0	0	0	0
									0	0	0	0	0
									0	0	0	0	0
									0	0	0	0	0
									0	0	0	0	0
									0	0	0	0	0
									0	0	0	0	0
									0	0	0	0	0
									0	0	0	0	0
									0	0	0	0	0
									0	0	0	0	0
									0	0	0	0	0
									0	0	0	0	0
									0	0	0	0	0
									0	0	0	0	0
									0	0	0	0	0
									0	0	0	0	0
									0	0	0	0	0
									0	0	0	0	0
									0	0	0	0	0
									0	0	0	0	0
									0	0	0	0	0
									0	0	0	0	0
									0	0	0	0	0
									0	0	0	0	0
									0	0	0	0	0
									0	0	0	0	0
									0	0	0	0	0
									0	0	0	0	0
									0	0	0	0	0
									0	0	0	0	0
									0	0	0	0	0
									0	0	0	0	0
									0	0	0	0	0
									0	0	0	0	0
									0	0	0	0	0
									0	0	0	0	0
									0	0	0	0	0
									0	0	0	0	0
									0	0	0	0	0
									0	0	0	0	0
									0	0	0	0	0
									0	0	0	0	0
									0	0	0	0	0
									0	0	0	0	0
									0	0	0	0	0
									0	0	0	0	0
									0	0	0	0	0
									0	0	0	0	0
									0	0	0	0	0
									0	0	0	0	0
									0	0	0	0	0
									0	0	0	0	0
									0	0	0	0	0
									0	0	0	0	0
									0	0	0	0	0
									0	0	0	0	0
									0	0	0	0	0
									0	0	0	0	0
									0	0	0	0	0
									0	0	0	0	0
									0	0	0	0	0
									0	0	0	0	0
									0	0	0	0	0
									0	0	0	0	0
									0	0	0	0	0
									0	0	0	0	0
									0	0	0	0	0
									0	0	0	0	0
									0	0	0	0	0
									0	0	0	0	0
									0	0	0	0	0
									0	0	0	0	0
									0	0	0	0	0
									0	0	0	0	0
									0	0	0	0	0
									0	0	0	0	0
									0	0	0	0	0
									0	0	0	0	0
									0	0	0	0	0
									0	0	0	0	0
									0	0	0	0	0
									0	0	0	0	0
									0	0	0	0	0
									0	0	0	0	0
									0	0	0	0	0
									0	0	0	0	0
									0	0	0	0	0
									0	0	0	0	0
									0	0	0	0	0
									0	0	0	0	0
									0	0	0	0	0
									0	0	0	0	0
									0	0	0	0	0
									0	0	0	0	0
									0	0	0	0	0
									0	0	0	0	0
									0	0	0	0	0
									0	0	0	0	0
									0	0	0	0	0
									0	0	0	0	0
									0	0	0	0	0
									0	0	0	0	0
									0	0	0	0	0
									0	0	0	0	0
									0	0	0	0	0
									0	0	0	0	0
									0	0	0	0	0
									0	0	0	0	0
									0	0	0	0	0
									0	0	0	0	0
									0	0	0	0	0
									0	0	0	0	0
									0	0	0	0	0
									0	0	0	0	0
									0	0	0	0	0
									0	0	0	0	0
									0	0	0	0	0
									0	0	0	0	0
									0	0	0	0	0
									0	0	0	0	0
									0	0	0	0	0
									0	0	0	0	0
									0	0	0	0	0
									0	0	0	0	0
									0	0	0	0	0
									0	0	0	0	0
									0	0	0	0	0
									0	0	0	0	0
									0	0	0	0	0
									0	0	0	0	0
									0	0	0	0	0
									0	0	0	0	0
									0	0	0	0	0
									0	0	0	0	0
									0	0	0	0	0
									0	0	0	0	0
									0	0	0	0	0
									0	0	0	0	0
									0	0	0	0	0
									0	0	0	0	0
									0	0	0	0	0
									0	0	0	0	0
									0	0	0	0	0
									0	0	0	0	0
									0	0	0	0	0
									0	0	0	0	0
									0	0	0	0	0
									0	0	0	0	0
									0	0	0	0	0
									0	0	0	0	0
									0	0	0	0	0
									0	0	0	0	0
									0	0	0	0	0
									0	0	0	0	0
									0	0	0	0	0
									0	0	0	0	0
									0	0	0	0	0
									0	0	0	0	0
									0	0	0	0	0
									0	0	0	0	0
									0	0	0	0	0
									0	0	0	0	0
									0	0	0	0	0
									0	0	0	0	0
									0	0	0	0	0
									0	0	0	0	0
									0	0	0	0	0
									0	0	0	0	0
									0	0	0	0	0
									0	0	0	0	0
									0	0	0	0	0
									0	0	0	0	0
									0	0	0	0	0
									0	0	0	0	0
									0	0	0	0	0
									0	0	0	0	0
									0	0	0	0	0
									0	0	0	0	0
									0	0	0	0	0
									0	0	0	0	0
									0	0	0	0	0
									0	0	0	0	0
									0	0	0	0	0
									0	0	0	0	0
									0	0	0	0	0
									0	0	0	0	0
									0	0	0	0	0
									0	0	0	0	0
									0	0	0	0	0
									0	0	0	0	0
									0	0	0	0	0
									0	0	0	0	0
									0	0	0	0	0
									0	0	0	0	0
									0	0	0	0	0
									0	0	0	0	0
									0	0	0	0	0
									0	0	0	0	0
									0	0	0	0	0
									0	0	0	0	0
									0	0	0	0	0
									0	0	0	0	0
									0	0	0	0	0
									0	0	0	0	0
									0	0	0	0	0
									0	0	0	0	0
									0	0	0	0	0
									0	0	0	0	0
									0	0	0	0	0
									0	0	0	0	0
									0	0	0	0	0
									0	0	0	0	0
									0	0	0	0	0
									0	0	0	0	0
									0	0	0	0	0
									0	0	0	0	0

## Sheet: kinship
rubbish	r	#test	mr	mrr	h1	h3	h10
[15:58:51.281945] r = 0 EM = # __T__	0	217	1.8203	0.868	0.7926	0.9355	0.9954		395.005	188.356	171.994	203.004	216.002		P2	Result Calculation					V2
[16:20:30.678682] r = 1 EM = # __T__	1	230	2.3957	0.7644	0.6261	0.9043	0.9609		551.011	175.812	144.003	207.989	221.007		Name=	kinship 325 rules=1000 embed_dim=default maxlen=3
[16:35:02.166090] r = 2 EM = # __T__	2	135	2.4148	0.7013	0.5481	0.8074	0.9704		325.998	94.6755	73.9935	108.999	131.004		E=	25	← Fill this !!!
[16:50:40.155546] r = 3 EM = # __T__	3	236	3.1568	0.7087	0.5508	0.8432	0.9576		745.005	167.253	129.989	198.995	225.994		Cols=	C	J	K	L	M	N
[17:07:57.499123] r = 4 EM = # __T__	4	126	3.2778	0.7443	0.6508	0.7778	0.9762		413.003	93.7818	82.0008	98.0028	123.001		Tmp=	5343	15803	3945.61	3298.95	4435.93	5109.06
[17:24:41.598569] r = 5 EM = # __T__	5	393	2.9644	0.6737	0.5089	0.7939	0.9771		1165.01	264.764	199.998	312.003	384			5343	17332	3771.27	3088.99	4259.98	5029.02
[17:43:20.423002] r = 6 EM = # __T__	6	407	3.2408	0.7516	0.6609	0.8034	0.941		1319.01	305.901	268.986	326.984	382.987			10686	33135.1	7716.87	6387.94	8695.91	10138.1
[18:05:39.811227] r = 7 EM = # __T__	7	255	1.4118	0.875	0.7882	0.9647	0.9961		360.009	223.125	200.991	245.999	254.005		Result=
[18:20:36.941694] r = 8 EM = # __T__	8	190	3.1158	0.6481	0.5158	0.7211	0.9474		592.002	123.139	98.002	137.009	180.006			2.95771	0.738463	0.617434	0.830231	0.956215
[18:42:45.210028] r = 9 EM = # __T__	9	499	1.9419	0.8221	0.7174	0.9098	0.986		969.008	410.228	357.983	453.99	492.014			3.24388	0.705833	0.578138	0.797302	0.941234
[19:00:48.580737] r = 10 EM = # __T__	10	234	2.2051	0.8007	0.6838	0.8932	0.9872		515.993	187.364	160.009	209.009	231.005			3.10079	0.722148	0.597786	0.813767	0.948725
[19:20:19.710252] r = 11 EM = # __T__	11	250	2.128	0.7294	0.576	0.856	0.988		532	182.35	144	214	247
[19:37:56.139417] r = 12 EM = # __T__	12	282	3.9539	0.7195	0.5745	0.8333	0.9468		1115	202.899	162.009	234.991	266.998
[19:52:44.622416] r = 13 EM = # __T__	13	205	2.3902	0.7113	0.5756	0.8195	0.9805		489.991	145.817	117.998	167.998	201.002
[20:11:53.137856] r = 14 EM = # __T__	14	427	3.8712	0.7202	0.6206	0.7892	0.9063		1653	307.525	264.996	336.988	386.99
[20:27:51.594800] r = 15 EM = # __T__	15	112	2.0179	0.8105	0.7143	0.9018	0.9911		226.005	90.776	80.0016	101.002	111.003
[20:48:35.579669] r = 16 EM = # __T__	16	635	3.0504	0.7552	0.6425	0.8535	0.9591		1937	479.552	407.987	541.972	609.029
[21:00:28.701007] r = 17 EM = # __T__	17	117	2.2051	0.8091	0.7094	0.8889	0.9744		257.997	94.6647	82.9998	104.001	114.005
[21:15:20.058556] r = 18 EM = # __T__	18	188	5.5106	0.4913	0.3564	0.5319	0.8245		1035.99	92.3644	67.0032	99.9972	155.006
[21:26:43.694931] r = 19 EM = # __T__	19	96	3.0938	0.6785	0.5417	0.7812	0.9375		297.005	65.136	52.0032	74.9952	90
[21:43:05.585238] r = 20 EM = # __T__	20	75	7.8267	0.4969	0.3067	0.6	0.88		587.002	37.2675	23.0025	45	66
[21:52:38.539180] r = 21 EM = # __T__	21	23	5.3913	0.5174	0.3913	0.5652	0.7826		124	11.9002	8.9999	12.9996	17.9998
[22:01:21.881241] r = 22 EM = # __T__	22	8	19.75	0.0786	0	0	0.125		158	0.6288	0	0	1
[22:06:22.897343] r = 23 EM = # __T__	23	2	7	0.1429	0	0	1		14	0.2858	0	0	2
[22:09:12.131941] r = 24 EM = # __T__	24	1	25	0.04	0	0	0		25	0.04	0	0	0
[22:28:03.618562] r = 25 EM = # __T__	25	217	2.3733	0.7644	0.6406	0.8571	0.9816		515.006	165.875	139.01	185.991	213.007
[22:42:29.718688] r = 26 EM = # __T__	26	230	3.3739	0.6019	0.4348	0.7217	0.9565		775.997	138.437	100.004	165.991	219.995
[23:01:34.920953] r = 27 EM = # __T__	27	135	3.5556	0.6447	0.5259	0.7185	0.9037		480.006	87.0345	70.9965	96.9975	121.999
[23:17:48.529126] r = 28 EM = # __T__	28	236	3.1441	0.7319	0.6186	0.8051	0.9661		742.008	172.728	145.99	190.004	228
[23:30:29.816195] r = 29 EM = # __T__	29	126	3.3175	0.7417	0.5873	0.8968	0.9762		418.005	93.4542	73.9998	112.997	123.001
[23:52:50.309239] r = 30 EM = # __T__	30	393	3.2799	0.6346	0.4631	0.7455	0.9542		1289	249.398	181.998	292.982	375.001
[00:09:17.228306] r = 31 EM = # __T__	31	407	4.0541	0.6448	0.5233	0.7174	0.8968		1650.02	262.434	212.983	291.982	364.998
[00:22:17.807275] r = 32 EM = # __T__	32	255	1.6784	0.8473	0.7529	0.9255	0.9882		427.992	216.062	191.989	236.002	251.991
[00:39:45.501583] r = 33 EM = # __T__	33	190	3.8842	0.6582	0.5263	0.7316	0.8947		737.998	125.058	99.997	139.004	169.993
[00:56:57.157620] r = 34 EM = # __T__	34	499	2.1804	0.7953	0.6794	0.8958	0.984		1088.02	396.855	339.021	447.004	491.016
[01:09:58.555098] r = 35 EM = # __T__	35	234	3.1538	0.7083	0.5983	0.7692	0.9487		737.989	165.742	140.002	179.993	221.996
[01:25:17.235332] r = 36 EM = # __T__	36	250	2.736	0.7472	0.644	0.82	0.952		684	186.8	161	205	238
[01:42:31.961537] r = 37 EM = # __T__	37	282	4.3121	0.7401	0.6454	0.7979	0.9149		1216.01	208.708	182.003	225.008	258.002
[01:56:06.108234] r = 38 EM = # __T__	38	205	3.7171	0.6044	0.4488	0.7122	0.9024		762.005	123.902	92.004	146.001	184.992
[02:14:50.981710] r = 39 EM = # __T__	39	427	3.9297	0.6872	0.5691	0.7752	0.8923		1677.98	293.434	243.006	331.01	381.012
[02:27:40.011472] r = 40 EM = # __T__	40	112	2.375	0.7479	0.6339	0.8214	0.9821		266	83.7648	70.9968	91.9968	109.995
[02:47:40.501231] r = 41 EM = # __T__	41	635	2.7323	0.7511	0.6252	0.852	0.9575		1735.01	476.948	397.002	541.02	608.013
[03:00:38.787422] r = 42 EM = # __T__	42	117	2.4615	0.8207	0.7265	0.9145	0.9744		287.995	96.0219	85.0005	106.996	114.005
[03:14:49.618948] r = 43 EM = # __T__	43	188	4.2872	0.5341	0.3457	0.6543	0.9096		805.994	100.411	64.9916	123.008	171.005
[03:27:41.903403] r = 44 EM = # __T__	44	96	2.8021	0.6784	0.5208	0.8125	0.9583		269.002	65.1264	49.9968	78	91.9968
[03:41:41.566842] r = 45 EM = # __T__	45	75	7.8133	0.5498	0.3867	0.6533	0.84		585.997	41.235	29.0025	48.9975	63
[03:52:27.996560] r = 46 EM = # __T__	46	23	3.4348	0.6895	0.5652	0.7826	0.913		79.0004	15.8585	12.9996	17.9998	20.999
[03:53:43.025712] r = 47 EM = # __T__	47	8	6	0.609	0.5	0.625	0.75		48	4.872	4	5	6
[03:55:02.695827] r = 48 EM = # __T__	48	2	6.5	0.5417	0.5	0.5	0.5		13	1.0834	1	1	1
[03:57:53.882229] r = 49 EM = # __T__	49	1	40	0.025	0	0	0		40	0.025	0	0	0
									0	0	0	0	0
									0	0	0	0	0
									0	0	0	0	0
									0	0	0	0	0
									0	0	0	0	0
									0	0	0	0	0
									0	0	0	0	0
									0	0	0	0	0
									0	0	0	0	0
									0	0	0	0	0
									0	0	0	0	0
									0	0	0	0	0
									0	0	0	0	0
									0	0	0	0	0
									0	0	0	0	0
									0	0	0	0	0
									0	0	0	0	0
									0	0	0	0	0
									0	0	0	0	0
									0	0	0	0	0
									0	0	0	0	0
									0	0	0	0	0
									0	0	0	0	0
									0	0	0	0	0
									0	0	0	0	0
									0	0	0	0	0
									0	0	0	0	0
									0	0	0	0	0
									0	0	0	0	0
									0	0	0	0	0
									0	0	0	0	0
									0	0	0	0	0
									0	0	0	0	0
									0	0	0	0	0
									0	0	0	0	0
									0	0	0	0	0
									0	0	0	0	0
									0	0	0	0	0
									0	0	0	0	0
									0	0	0	0	0
									0	0	0	0	0
									0	0	0	0	0
									0	0	0	0	0
									0	0	0	0	0
									0	0	0	0	0
									0	0	0	0	0
									0	0	0	0	0
									0	0	0	0	0
									0	0	0	0	0
									0	0	0	0	0
									0	0	0	0	0
									0	0	0	0	0
									0	0	0	0	0
									0	0	0	0	0
									0	0	0	0	0
									0	0	0	0	0
									0	0	0	0	0
									0	0	0	0	0
									0	0	0	0	0
									0	0	0	0	0
									0	0	0	0	0
									0	0	0	0	0
									0	0	0	0	0
									0	0	0	0	0
									0	0	0	0	0
									0	0	0	0	0
									0	0	0	0	0
									0	0	0	0	0
									0	0	0	0	0
									0	0	0	0	0
									0	0	0	0	0
									0	0	0	0	0
									0	0	0	0	0
									0	0	0	0	0
									0	0	0	0	0
									0	0	0	0	0
									0	0	0	0	0
									0	0	0	0	0
									0	0	0	0	0
									0	0	0	0	0
									0	0	0	0	0
									0	0	0	0	0
									0	0	0	0	0
									0	0	0	0	0
									0	0	0	0	0
									0	0	0	0	0
									0	0	0	0	0
									0	0	0	0	0
									0	0	0	0	0
									0	0	0	0	0
									0	0	0	0	0
									0	0	0	0	0
									0	0	0	0	0
									0	0	0	0	0
									0	0	0	0	0
									0	0	0	0	0
									0	0	0	0	0
									0	0	0	0	0
									0	0	0	0	0
									0	0	0	0	0
									0	0	0	0	0
									0	0	0	0	0
									0	0	0	0	0
									0	0	0	0	0
									0	0	0	0	0
									0	0	0	0	0
									0	0	0	0	0
									0	0	0	0	0
									0	0	0	0	0
									0	0	0	0	0
									0	0	0	0	0
									0	0	0	0	0
									0	0	0	0	0
									0	0	0	0	0
									0	0	0	0	0
									0	0	0	0	0
									0	0	0	0	0
									0	0	0	0	0
									0	0	0	0	0
									0	0	0	0	0
									0	0	0	0	0
									0	0	0	0	0
									0	0	0	0	0
									0	0	0	0	0
									0	0	0	0	0
									0	0	0	0	0
									0	0	0	0	0
									0	0	0	0	0
									0	0	0	0	0
									0	0	0	0	0
									0	0	0	0	0
									0	0	0	0	0
									0	0	0	0	0
									0	0	0	0	0
									0	0	0	0	0
									0	0	0	0	0
									0	0	0	0	0
									0	0	0	0	0
									0	0	0	0	0
									0	0	0	0	0
									0	0	0	0	0
									0	0	0	0	0
									0	0	0	0	0
									0	0	0	0	0
									0	0	0	0	0
									0	0	0	0	0
									0	0	0	0	0
									0	0	0	0	0
									0	0	0	0	0
									0	0	0	0	0
									0	0	0	0	0
									0	0	0	0	0
									0	0	0	0	0
									0	0	0	0	0
									0	0	0	0	0
									0	0	0	0	0
									0	0	0	0	0
									0	0	0	0	0
									0	0	0	0	0
									0	0	0	0	0
									0	0	0	0	0
									0	0	0	0	0
									0	0	0	0	0
									0	0	0	0	0
									0	0	0	0	0
									0	0	0	0	0
									0	0	0	0	0
									0	0	0	0	0
									0	0	0	0	0
									0	0	0	0	0
									0	0	0	0	0
									0	0	0	0	0
									0	0	0	0	0
									0	0	0	0	0
									0	0	0	0	0
									0	0	0	0	0
									0	0	0	0	0
									0	0	0	0	0
									0	0	0	0	0
									0	0	0	0	0
									0	0	0	0	0
									0	0	0	0	0
									0	0	0	0	0
									0	0	0	0	0
									0	0	0	0	0
									0	0	0	0	0
									0	0	0	0	0
									0	0	0	0	0
									0	0	0	0	0
									0	0	0	0	0
									0	0	0	0	0
									0	0	0	0	0
									0	0	0	0	0
									0	0	0	0	0
									0	0	0	0	0
									0	0	0	0	0
									0	0	0	0	0
									0	0	0	0	0
									0	0	0	0	0
									0	0	0	0	0
									0	0	0	0	0
									0	0	0	0	0
									0	0	0	0	0
									0	0	0	0	0
									0	0	0	0	0
									0	0	0	0	0
									0	0	0	0	0
									0	0	0	0	0
									0	0	0	0	0
									0	0	0	0	0
									0	0	0	0	0
									0	0	0	0	0
									0	0	0	0	0
									0	0	0	0	0
									0	0	0	0	0
									0	0	0	0	0
									0	0	0	0	0
									0	0	0	0	0
									0	0	0	0	0
									0	0	0	0	0
									0	0	0	0	0
									0	0	0	0	0
									0	0	0	0	0
									0	0	0	0	0
									0	0	0	0	0
									0	0	0	0	0
									0	0	0	0	0
									0	0	0	0	0
									0	0	0	0	0
									0	0	0	0	0
									0	0	0	0	0
									0	0	0	0	0
									0	0	0	0	0
									0	0	0	0	0
									0	0	0	0	0
									0	0	0	0	0
									0	0	0	0	0
									0	0	0	0	0
									0	0	0	0	0
									0	0	0	0	0
									0	0	0	0	0
									0	0	0	0	0
									0	0	0	0	0
									0	0	0	0	0
									0	0	0	0	0
									0	0	0	0	0
									0	0	0	0	0
									0	0	0	0	0
									0	0	0	0	0
									0	0	0	0	0
									0	0	0	0	0
									0	0	0	0	0
									0	0	0	0	0
									0	0	0	0	0
									0	0	0	0	0
									0	0	0	0	0
									0	0	0	0	0
									0	0	0	0	0
									0	0	0	0	0
									0	0	0	0	0
									0	0	0	0	0
									0	0	0	0	0
									0	0	0	0	0
									0	0	0	0	0
									0	0	0	0	0
									0	0	0	0	0
									0	0	0	0	0
									0	0	0	0	0
									0	0	0	0	0
									0	0	0	0	0
									0	0	0	0	0
									0	0	0	0	0
									0	0	0	0	0
									0	0	0	0	0
									0	0	0	0	0
									0	0	0	0	0
									0	0	0	0	0
									0	0	0	0	0
									0	0	0	0	0
									0	0	0	0	0
									0	0	0	0	0
									0	0	0	0	0
									0	0	0	0	0
									0	0	0	0	0
									0	0	0	0	0
									0	0	0	0	0
									0	0	0	0	0
									0	0	0	0	0
									0	0	0	0	0
									0	0	0	0	0
									0	0	0	0	0
									0	0	0	0	0
									0	0	0	0	0
									0	0	0	0	0
									0	0	0	0	0
									0	0	0	0	0
									0	0	0	0	0
									0	0	0	0	0
									0	0	0	0	0
									0	0	0	0	0
									0	0	0	0	0
									0	0	0	0	0
									0	0	0	0	0
									0	0	0	0	0
									0	0	0	0	0
									0	0	0	0	0
									0	0	0	0	0
									0	0	0	0	0
									0	0	0	0	0
									0	0	0	0	0
									0	0	0	0	0
									0	0	0	0	0
									0	0	0	0	0
									0	0	0	0	0
									0	0	0	0	0
									0	0	0	0	0
									0	0	0	0	0
									0	0	0	0	0
									0	0	0	0	0
									0	0	0	0	0
									0	0	0	0	0
									0	0	0	0	0
									0	0	0	0	0
									0	0	0	0	0
									0	0	0	0	0
									0	0	0	0	0
									0	0	0	0	0
									0	0	0	0	0
									0	0	0	0	0
									0	0	0	0	0
									0	0	0	0	0
									0	0	0	0	0
									0	0	0	0	0
									0	0	0	0	0
									0	0	0	0	0
									0	0	0	0	0
									0	0	0	0	0
									0	0	0	0	0
									0	0	0	0	0
									0	0	0	0	0
									0	0	0	0	0
									0	0	0	0	0
									0	0	0	0	0
									0	0	0	0	0
									0	0	0	0	0
									0	0	0	0	0
									0	0	0	0	0
									0	0	0	0	0
									0	0	0	0	0
									0	0	0	0	0
									0	0	0	0	0
									0	0	0	0	0
									0	0	0	0	0
									0	0	0	0	0
									0	0	0	0	0
									0	0	0	0	0
									0	0	0	0	0
									0	0	0	0	0
									0	0	0	0	0
									0	0	0	0	0
									0	0	0	0	0
									0	0	0	0	0
									0	0	0	0	0
									0	0	0	0	0
									0	0	0	0	0
									0	0	0	0	0
									0	0	0	0	0
									0	0	0	0	0
									0	0	0	0	0
									0	0	0	0	0
									0	0	0	0	0
									0	0	0	0	0
									0	0	0	0	0
									0	0	0	0	0
									0	0	0	0	0
									0	0	0	0	0
									0	0	0	0	0
									0	0	0	0	0
									0	0	0	0	0
									0	0	0	0	0
									0	0	0	0	0
									0	0	0	0	0
									0	0	0	0	0
									0	0	0	0	0
									0	0	0	0	0
									0	0	0	0	0
									0	0	0	0	0
									0	0	0	0	0
									0	0	0	0	0
									0	0	0	0	0
									0	0	0	0	0
									0	0	0	0	0
									0	0	0	0	0
									0	0	0	0	0
									0	0	0	0	0
									0	0	0	0	0
									0	0	0	0	0
									0	0	0	0	0
									0	0	0	0	0
									0	0	0	0	0
									0	0	0	0	0
									0	0	0	0	0
									0	0	0	0	0
									0	0	0	0	0
									0	0	0	0	0
									0	0	0	0	0
									0	0	0	0	0
									0	0	0	0	0
									0	0	0	0	0
									0	0	0	0	0
									0	0	0	0	0
									0	0	0	0	0
									0	0	0	0	0
									0	0	0	0	0
									0	0	0	0	0
									0	0	0	0	0
									0	0	0	0	0
									0	0	0	0	0
									0	0	0	0	0
									0	0	0	0	0
									0	0	0	0	0
									0	0	0	0	0
									0	0	0	0	0
									0	0	0	0	0

## Sheet: fb15k237_noemb
rubbish	r	#test	mr	mrr	h1	h3	h10
[15:21:02.670594] r = 0 EM = # __T__	0	39	4.7308	0.7654	0.7436	0.7453	0.8598		184.501	29.8506	29.0004	29.0667	33.5322		P2	Result Calculation					V2
[15:13:05.946821] r = 1 EM = # __T__	1	90	5.6667	0.3354	0.1278	0.3774	0.8239		510.003	30.186	11.502	33.966	74.151		Name=	fb15k237 noemb rules=3000 embed_dim=1 maxlen=4
[17:02:41.085138] r = 2 EM = # __T__	2	1311	45.0904	0.5298	0.3748	0.6161	0.8537		59113.5	694.568	491.363	807.707	1119.2		E=	237	← Fill this !!!
[15:40:42.154794] r = 3 EM = # __T__	3	13	10.8077	0.693	0.6154	0.7692	0.9231		140.5	9.009	8.0002	9.9996	12.0003		Cols=	C	J	K	L	M	N
[17:48:18.138069] r = 4 EM = # __T__	4	722	20.8393	0.4314	0.2881	0.4917	0.7258		15046	311.471	208.008	355.007	524.028		Tmp=	20466	9.39347e+06	7708.21	5919.86	8431.57	11228.6
[15:12:37.952869] r = 5 EM = # __T__	5	1	2	0.5	0	1	1		2	0.5	0	1	1			20466	1.26392e+07	4073.63	2591.86	4458.56	6992.93
[14:54:29.436860] r = 6 EM = # __T__	6	22	1	1	1	1	1		22	22	22	22	22			40932	2.20327e+07	11781.8	8511.72	12890.1	18221.5
[17:12:55.185133] r = 7 EM = # __T__	7	73	619.918	0.4977	0.4178	0.5342	0.6781		45254	36.3321	30.4994	38.9966	49.5013		Result=
[15:02:15.171369] r = 8 EM = # __T__	8	2	3.5	0.2917	0	0.5	1		7	0.5834	0	1	2			458.979	0.376635	0.289253	0.41198	0.548646
[15:35:18.730497] r = 9 EM = # __T__	9	132	1778.28	0.1691	0.101	0.1742	0.3178		234732	22.3212	13.332	22.9944	41.9496			617.571	0.199044	0.126642	0.217852	0.341685
[16:58:32.026670] r = 10 EM = # __T__	10	217	744.537	0.0719	0.0323	0.0645	0.1613		161565	15.6023	7.0091	13.9965	35.0021			538.275	0.287839	0.207948	0.314916	0.445166
[16:13:16.834148] r = 11 EM = # __T__	11	41	557.793	0.373	0.1958	0.5143	0.5924		22869.5	15.293	8.0278	21.0863	24.2884
[15:58:11.234454] r = 12 EM = # __T__	12	34	330.279	0.2352	0.1471	0.2941	0.3824		11229.5	7.9968	5.0014	9.9994	13.0016
[15:25:55.233704] r = 13 EM = # __T__	13	105	6.1952	0.3501	0.1928	0.3525	0.8252		650.496	36.7605	20.244	37.0125	86.646
[15:39:21.101825] r = 14 EM = # __T__	14	10	1	1	1	1	1		10	10	10	10	10
[15:23:13.830164] r = 15 EM = # __T__	15	11	1322.73	0.8183	0.8182	0.8182	0.8183		14550	9.0013	9.0002	9.0002	9.0013
[15:48:54.171686] r = 16 EM = # __T__	16	86	120.709	0.0704	0.0233	0.0581	0.1517		10381	6.0544	2.0038	4.9966	13.0462
[17:23:50.133066] r = 17 EM = # __T__	17	314	51.1465	0.7478	0.6879	0.7643	0.8694		16060	234.809	216.001	239.99	272.992
[15:36:32.569302] r = 18 EM = # __T__	18	13	28.0769	0.1028	0	0.0769	0.3846		365	1.3364	0	0.9997	4.9998
[15:40:06.461097] r = 19 EM = # __T__	19	22	391.136	0.2765	0.1818	0.3182	0.5		8605	6.083	3.9996	7.0004	11
[15:31:11.268117] r = 20 EM = # __T__	20	26	111.154	0.1151	0.0769	0.0769	0.2308		2890	2.9926	1.9994	1.9994	6.0008
[15:46:56.010512] r = 21 EM = # __T__	21	24	1064.67	0.1927	0.0417	0.25	0.5		25552	4.6248	1.0008	6	12
[17:05:46.500815] r = 22 EM = # __T__	22	305	1103.41	0.2334	0.1541	0.2557	0.3663		336541	71.187	47.0005	77.9885	111.722
[15:38:14.130348] r = 23 EM = # __T__	23	60	1.0417	0.9837	0.9708	0.9958	1		62.502	59.022	58.248	59.748	60
[15:35:36.927581] r = 24 EM = # __T__	24	14	2175.86	0.3598	0.3571	0.3571	0.3571		30462	5.0372	4.9994	4.9994	4.9994
[16:18:39.626781] r = 25 EM = # __T__	25	8	1009.38	0.0198	0	0	0		8075	0.1584	0	0	0
[17:00:22.233867] r = 26 EM = # __T__	26	0	0	0	0	0	0		0	0	0	0	0
[16:59:16.722069] r = 27 EM = # __T__	27	16	92.1875	0.2686	0.1875	0.3125	0.375		1475	4.2976	3	5	6
[17:24:31.193954] r = 28 EM = # __T__	28	24	1264.08	0.1818	0.125	0.1667	0.2917		30338	4.3632	3	4.0008	7.0008
[16:47:53.891835] r = 29 EM = # __T__	29	3	2	0.75	0.6667	0.6667	1		6	2.25	2.0001	2.0001	3
[18:55:48.512741] r = 30 EM = # __T__	30	170	1050.87	0.2179	0.1353	0.25	0.4044		178648	37.043	23.001	42.5	68.748
[17:15:06.045197] r = 31 EM = # __T__	31	330	1239.7	0.0891	0.0577	0.0854	0.1429		409101	29.403	19.041	28.182	47.157
[19:20:19.637433] r = 32 EM = # __T__	32	11	81.5	0.4427	0.3636	0.4545	0.5455		896.5	4.8697	3.9996	4.9995	6.0005
[16:50:42.078845] r = 33 EM = # __T__	33	24	26.875	0.1391	0.0417	0.1667	0.3333		645	3.3384	1.0008	4.0008	7.9992
[16:47:30.176776] r = 34 EM = # __T__	34	13	2.1923	0.5865	0.3077	0.8077	1		28.4999	7.6245	4.0001	10.5001	13
[18:08:20.256283] r = 35 EM = # __T__	35	151	1.0397	0.9823	0.9669	1	1		156.995	148.327	146.002	151	151
[16:44:21.973202] r = 36 EM = # __T__	36	22	1	1	1	1	1		22	22	22	22	22
[16:56:41.222187] r = 37 EM = # __T__	37	7	10	0.8594	0.8571	0.8571	0.8571		70	6.0158	5.9997	5.9997	5.9997
[17:09:29.843771] r = 38 EM = # __T__	38	14	1.2857	0.9429	0.9286	0.9286	1		17.9998	13.2006	13.0004	13.0004	14
[23:09:15.167565] r = 39 EM = # __T__	39	311	1291.05	0.017	0.0043	0.0129	0.0354		401516	5.287	1.3373	4.0119	11.0094
[17:07:16.277629] r = 40 EM = # __T__	40	29	15.0345	0.2669	0.0345	0.3793	0.7241		436	7.7401	1.0005	10.9997	20.9989
[16:56:08.728434] r = 41 EM = # __T__	41	3	116.333	0.6676	0.6667	0.6667	0.6667		349	2.0028	2.0001	2.0001	2.0001
[16:48:28.180990] r = 42 EM = # __T__	42	48	1.1042	0.9618	0.9375	1	1		53.0016	46.1664	45	48	48
[16:47:00.920333] r = 43 EM = # __T__	43	11	1.3636	0.8182	0.6364	1	1		14.9996	9.0002	7.0004	11	11
[16:46:27.477073] r = 44 EM = # __T__	44	11	3070.27	0.1401	0.0909	0.1818	0.1818		33773	1.5411	0.9999	1.9998	1.9998
[19:06:02.144997] r = 45 EM = # __T__	45	16	9.75	0.6256	0.5	0.6875	0.875		156	10.0096	8	11	14
[17:46:38.861207] r = 46 EM = # __T__	46	19	2410.32	0.0504	0	0.0526	0.1588		45796	0.9576	0	0.9994	3.0172
[16:45:20.558968] r = 47 EM = # __T__	47	29	3616.41	0.0576	0.0345	0.0575	0.0874		104876	1.6704	1.0005	1.6675	2.5346
[17:04:24.480059] r = 48 EM = # __T__	48	23	45.8261	0.0743	0	0.0435	0.3043		1054	1.7089	0	1.0005	6.9989
[17:02:43.516805] r = 49 EM = # __T__	49	40	23.975	0.1185	0	0.125	0.35		959	4.74	0	5	14
[18:00:42.588594] r = 50 EM = # __T__	50	152	20.6546	0.2323	0.0987	0.2368	0.5658		3139.5	35.3096	15.0024	35.9936	86.0016
[16:42:25.408968] r = 51 EM = # __T__	51	20	1	1	1	1	1		20	20	20	20	20
[17:16:55.101169] r = 52 EM = # __T__	52	38	1.4737	0.8268	0.7105	0.9737	1		56.0006	31.4184	26.999	37.0006	38
[16:56:09.937229] r = 53 EM = # __T__	53	13	7.2308	0.4589	0.3077	0.6154	0.7692		94.0004	5.9657	4.0001	8.0002	9.9996
[16:55:01.658180] r = 54 EM = # __T__	54	10	1.3	0.85	0.7	1	1		13	8.5	7	10	10
[17:13:29.649381] r = 55 EM = # __T__	55	31	5.5	0.588	0.5161	0.5484	0.8387		170.5	18.228	15.9991	17.0004	25.9997
[17:03:23.879758] r = 56 EM = # __T__	56	17	6.2353	0.3864	0.1765	0.4706	0.8235		106	6.5688	3.0005	8.0002	13.9995
[17:14:39.773215] r = 57 EM = # __T__	57	11	40.5455	0.5728	0.3636	0.7727	0.8182		446	6.3008	3.9996	8.4997	9.0002
[20:08:07.003437] r = 58 EM = # __T__	58	402	760.5	0.8956	0.8955	0.8955	0.8956		305721	360.031	359.991	359.991	360.031
[20:30:53.140670] r = 59 EM = # __T__	59	664	311.199	0.0322	0.0105	0.0196	0.0527		206636	21.3808	6.972	13.0144	34.9928
[18:33:57.911961] r = 60 EM = # __T__	60	100	275.775	0.2968	0.2	0.35	0.46		27577.5	29.68	20	35	46
[17:21:51.805049] r = 61 EM = # __T__	61	55	273.3	0.4817	0.3273	0.6	0.7758		15031.5	26.4935	18.0015	33	42.669
[16:53:21.854056] r = 62 EM = # __T__	62	77	3.1818	0.6165	0.4481	0.7468	0.9254		244.999	47.4705	34.5037	57.5036	71.2558
[16:54:58.935650] r = 63 EM = # __T__	63	2	4797.5	0.0007	0	0	0		9595	0.0014	0	0	0
[15:31:22.478684] r = 64 EM = # __T__	64	0	0	0	0	0	0		0	0	0	0	0
[15:16:36.236051] r = 65 EM = # __T__	65	4	1.75	0.8125	0.75	0.75	1		7	3.25	3	3	4
[17:53:23.142676] r = 66 EM = # __T__	66	18	16.8333	0.4146	0.2222	0.5556	0.6111		302.999	7.4628	3.9996	10.0008	10.9998
[16:06:31.592497] r = 67 EM = # __T__	67	3	1.3333	0.8333	0.6667	1	1		3.9999	2.4999	2.0001	3	3
[18:13:26.474409] r = 68 EM = # __T__	68	8	269.625	0.0228	0	0	0		2157	0.1824	0	0	0
[15:35:32.442384] r = 69 EM = # __T__	69	3	1	1	1	1	1		3	3	3	3	3
[15:15:10.980037] r = 70 EM = # __T__	70	25	65.36	0.1548	0.08	0.16	0.4		1634	3.87	2	4	10
[17:40:57.074642] r = 71 EM = # __T__	71	53	2355.19	0.0825	0.0377	0.0566	0.1698		124825	4.3725	1.9981	2.9998	8.9994
[15:21:28.406949] r = 72 EM = # __T__	72	9	8.5556	0.4528	0.3333	0.4444	0.6667		77.0004	4.0752	2.9997	3.9996	6.0003
[15:45:02.878989] r = 73 EM = # __T__	73	11	535.045	0.0192	0	0	0		5885.5	0.2112	0	0	0
[17:10:58.928204] r = 74 EM = # __T__	74	1	4	0.25	0	0	1		4	0.25	0	0	1
[18:48:37.408791] r = 75 EM = # __T__	75	1447	79.6579	0.2705	0.0968	0.3317	0.6551		115265	391.413	140.07	479.97	947.93
[16:31:18.369918] r = 76 EM = # __T__	76	20	31.2	0.4065	0.2	0.55	0.85		624	8.13	4	11	17
[16:14:06.355248] r = 77 EM = # __T__	77	10	2.3	0.5367	0.2	0.9	1		23	5.367	2	9	10
[15:55:44.853941] r = 78 EM = # __T__	78	0	0	0	0	0	0		0	0	0	0	0
[15:50:30.698922] r = 79 EM = # __T__	79	84	1	1	1	1	1		84	84	84	84	84
[16:07:06.181383] r = 80 EM = # __T__	80	323	5.5975	0.711	0.6192	0.7523	0.9257		1807.99	229.653	200.002	242.993	299.001
[18:23:59.410723] r = 81 EM = # __T__	81	98	2.2908	0.7822	0.6939	0.8571	0.9694		224.498	76.6556	68.0022	83.9958	95.0012
[03:13:02.394821] r = 82 EM = # __T__	82	836	3340.27	0.0571	0.0263	0.0631	0.1182		2.79246e+06	47.7356	21.9868	52.7516	98.8152
[15:54:39.373238] r = 83 EM = # __T__	83	1	1	1	1	1	1		1	1	1	1	1
[15:38:47.174806] r = 84 EM = # __T__	84	21	1.0476	0.9762	0.9524	1	1		21.9996	20.5002	20.0004	21	21
[16:00:34.500977] r = 85 EM = # __T__	85	53	506.557	0.0253	0.0189	0.0189	0.0189		26847.5	1.3409	1.0017	1.0017	1.0017
[22:35:01.857398] r = 86 EM = # __T__	86	92	582.543	0.2988	0.2065	0.3043	0.5226		53594	27.4896	18.998	27.9956	48.0792
[15:45:50.314574] r = 87 EM = # __T__	87	43	1.4535	0.8081	0.6512	1	1		62.5005	34.7483	28.0016	43	43
[16:40:58.681382] r = 88 EM = # __T__	88	321	19.1885	0.2138	0.091	0.2137	0.4953		6159.51	68.6298	29.211	68.5977	158.991
[16:50:42.750067] r = 89 EM = # __T__	89	17	87.5882	0.1187	0	0.1176	0.4118		1489	2.0179	0	1.9992	7.0006
[17:23:44.250746] r = 90 EM = # __T__	90	16	124.219	0.2571	0.25	0.25	0.25		1987.5	4.1136	4	4	4
[17:40:33.615117] r = 91 EM = # __T__	91	27	1020.57	0.0138	0	0	0.037		27555.5	0.3726	0	0	0.999
[17:44:21.658097] r = 92 EM = # __T__	92	9	1627.5	0.1764	0.1111	0.1111	0.3333		14647.5	1.5876	0.9999	0.9999	2.9997
[17:01:18.400405] r = 93 EM = # __T__	93	0	0	0	0	0	0		0	0	0	0	0
[19:46:07.218343] r = 94 EM = # __T__	94	10	320.6	0.5469	0.5	0.6	0.6		3206	5.469	5	6	6
[17:34:17.119981] r = 95 EM = # __T__	95	11	2.7273	0.5689	0.2727	0.9091	0.9091		30.0003	6.2579	2.9997	10.0001	10.0001
[19:27:33.745557] r = 96 EM = # __T__	96	20	367.575	0.8414	0.825	0.85	0.85		7351.5	16.828	16.5	17	17
[17:09:40.684502] r = 97 EM = # __T__	97	80	3.9313	0.5685	0.3688	0.7073	0.9583		314.504	45.48	29.504	56.584	76.664
[16:58:13.377056] r = 98 EM = # __T__	98	3	1.3333	0.8333	0.6667	1	1		3.9999	2.4999	2.0001	3	3
[18:27:20.884419] r = 99 EM = # __T__	99	4	34.625	0.5074	0.5	0.5	0.5		138.5	2.0296	2	2	2
[17:00:25.975682] r = 100 EM = # __T__	100	2	11.5	0.2738	0	0.5	0.5		23	0.5476	0	1	1
[17:05:36.224709] r = 101 EM = # __T__	101	21	1.1905	0.9048	0.8095	1	1		25.0005	19.0008	16.9995	21	21
[18:30:01.525905] r = 102 EM = # __T__	102	26	55.9615	0.3507	0.2308	0.3846	0.5769		1455	9.1182	6.0008	9.9996	14.9994
[23:20:47.983895] r = 103 EM = # __T__	103	34	179.529	0.0676	0	0.0588	0.2353		6104	2.2984	0	1.9992	8.0002
[18:35:23.684287] r = 104 EM = # __T__	104	1	21	0.0476	0	0	0		21	0.0476	0	0	0
[17:25:46.773154] r = 105 EM = # __T__	105	287	129.42	0.1096	0.0592	0.1045	0.2056		37143.5	31.4552	16.9904	29.9915	59.0072
[17:04:15.985954] r = 106 EM = # __T__	106	20	1158.95	0.0774	0.05	0.05	0.15		23179	1.548	1	1	3
[16:54:18.054806] r = 107 EM = # __T__	107	20	1.05	0.975	0.95	1	1		21	19.5	19	20	20
[22:08:38.404817] r = 108 EM = # __T__	108	858	261.909	0.0589	0.0198	0.0536	0.1282		224717	50.5362	16.9884	45.9888	109.996
[19:25:59.263785] r = 109 EM = # __T__	109	31	251.484	0.2157	0.0968	0.2581	0.3656		7796	6.6867	3.0008	8.0011	11.3336
[18:54:15.178375] r = 110 EM = # __T__	110	251	1333.39	0.0114	0.004	0.008	0.0139		334682	2.8614	1.004	2.008	3.4889
[18:25:20.886558] r = 111 EM = # __T__	111	606	2.8185	0.6864	0.5495	0.7756	0.9488		1708.01	415.958	332.997	470.014	574.973
[17:17:22.185253] r = 112 EM = # __T__	112	12	1	1	1	1	1		12	12	12	12	12
[17:23:31.436258] r = 113 EM = # __T__	113	41	362.951	0.5249	0.3933	0.5701	0.8049		14881	21.5209	16.1253	23.3741	33.0009
[20:04:05.108596] r = 114 EM = # __T__	114	131	173.397	0.6429	0.5573	0.6641	0.8092		22715	84.2199	73.0063	86.9971	106.005
[16:48:45.254045] r = 115 EM = # __T__	115	13	2252.08	0.1769	0.0769	0.2308	0.2501		29277	2.2997	0.9997	3.0004	3.2513
[17:51:49.233102] r = 116 EM = # __T__	116	48	607.469	0.7576	0.6667	0.8542	0.9167		29158.5	36.3648	32.0016	41.0016	44.0016
[17:19:22.610475] r = 117 EM = # __T__	117	70	1630.2	0.0536	0	0.0714	0.0857		114114	3.752	0	4.998	5.999
[18:37:36.077790] r = 118 EM = # __T__	118	153	268.778	0.0423	0.0065	0.0458	0.1046		41123	6.4719	0.9945	7.0074	16.0038
[17:50:41.286638] r = 119 EM = # __T__	119	34	64.25	0.181	0.15	0.1559	0.2353		2184.5	6.154	5.1	5.3006	8.0002
[22:03:08.289654] r = 120 EM = # __T__	120	60	722.133	0.3609	0.2083	0.4833	0.6		43328	21.654	12.498	28.998	36
[18:01:51.477489] r = 121 EM = # __T__	121	53	28.9057	0.1572	0.0566	0.1321	0.3774		1532	8.3316	2.9998	7.0013	20.0022
[20:27:38.065610] r = 122 EM = # __T__	122	9	10.1111	0.2501	0.1111	0.3333	0.4444		90.9999	2.2509	0.9999	2.9997	3.9996
[20:58:27.731640] r = 123 EM = # __T__	123	258	86.1357	0.2146	0.0969	0.2597	0.4496		22223	55.3668	25.0002	67.0026	115.997
[19:45:11.840127] r = 124 EM = # __T__	124	91	1123.51	0.0634	0.0275	0.0769	0.0989		102239	5.7694	2.5025	6.9979	8.9999
[19:38:49.531576] r = 125 EM = # __T__	125	1067	210.326	0.2307	0.1209	0.2517	0.4595		224418	246.157	129	268.564	490.287
[19:07:07.274495] r = 126 EM = # __T__	126	346	1.0578	0.9711	0.9422	1	1		365.999	336.001	326.001	346	346
[17:04:48.414742] r = 127 EM = # __T__	127	12	1	1	1	1	1		12	12	12	12	12
[15:44:23.255379] r = 128 EM = # __T__	128	22	48.7727	0.1637	0.0909	0.1818	0.2727		1073	3.6014	1.9998	3.9996	5.9994
[16:02:28.134277] r = 129 EM = # __T__	129	121	383.917	0.0986	0.0413	0.1074	0.2231		46454	11.9306	4.9973	12.9954	26.9951
[18:02:44.608951] r = 130 EM = # __T__	130	53	1.6509	0.933	0.9057	0.9434	0.984		87.4977	49.449	48.0021	50.0002	52.152
[16:22:08.520932] r = 131 EM = # __T__	131	32	1.25	0.9125	0.8438	0.9688	1		40	29.2	27.0016	31.0016	32
[18:21:11.479232] r = 132 EM = # __T__	132	15	5.1	0.7548	0.6667	0.8	0.8667		76.5	11.322	10.0005	12	13.0005
[16:35:11.477983] r = 133 EM = # __T__	133	32	768.969	0.4249	0.3125	0.5	0.5938		24607	13.5968	10	16	19.0016
[15:24:46.741235] r = 134 EM = # __T__	134	29	260.5	0.3071	0.1379	0.3448	0.6552		7554.5	8.9059	3.9991	9.9992	19.0008
[17:57:22.393762] r = 135 EM = # __T__	135	94	172.011	0.4563	0.2872	0.5851	0.6702		16169	42.8922	26.9968	54.9994	62.9988
[15:38:57.141894] r = 136 EM = # __T__	136	63	15.254	0.3191	0.2063	0.3333	0.5714		961.002	20.1033	12.9969	20.9979	35.9982
[16:05:59.258814] r = 137 EM = # __T__	137	7	1538.36	0.363	0.2857	0.4286	0.4289		10768.5	2.541	1.9999	3.0002	3.0023
[17:21:42.167992] r = 138 EM = # __T__	138	0	0	0	0	0	0		0	0	0	0	0
[18:56:18.657432] r = 139 EM = # __T__	139	16	1	1	1	1	1		16	16	16	16	16
[17:22:25.894053] r = 140 EM = # __T__	140	13	279.846	0.7798	0.7692	0.7692	0.8462		3638	10.1374	9.9996	9.9996	11.0006
[16:24:42.090865] r = 141 EM = # __T__	141	16	1.0625	0.9688	0.9375	1	1		17	15.5008	15	16	16
[18:02:15.723047] r = 142 EM = # __T__	142	13	7.2308	0.6887	0.6154	0.7692	0.7692		94.0004	8.9531	8.0002	9.9996	9.9996
[17:50:27.283387] r = 143 EM = # __T__	143	26	1220.12	0.1438	0.0769	0.1538	0.2769		31723	3.7388	1.9994	3.9988	7.1994
[16:14:42.473712] r = 144 EM = # __T__	144	0	0	0	0	0	0		0	0	0	0	0
[18:40:48.431199] r = 145 EM = # __T__	145	38	1943.28	0.3729	0.2895	0.3947	0.5526		73844.5	14.1702	11.001	14.9986	20.9988
[03:43:41.243838] r = 146 EM = # __T__	146	11	456.909	0.0201	0	0	0		5026	0.2211	0	0	0
[16:05:47.936075] r = 147 EM = # __T__	147	50	727.95	0.9001	0.9	0.9	0.9001		36397.5	45.005	45	45	45.005
[18:41:08.379789] r = 148 EM = # __T__	148	436	17.9094	0.8796	0.7615	0.9977	0.9977		7808.5	383.506	332.014	434.997	434.997
[17:04:06.631399] r = 149 EM = # __T__	149	78	317.827	0.2959	0.1795	0.3463	0.527		24790.5	23.0802	14.001	27.0114	41.106
[22:50:39.289633] r = 150 EM = # __T__	150	46	1	1	1	1	1		46	46	46	46	46
[16:01:34.911158] r = 151 EM = # __T__	151	2	20	0.05	0	0	0		40	0.1	0	0	0
[16:49:02.190143] r = 152 EM = # __T__	152	38	1.2105	0.9123	0.8421	1	1		45.999	34.6674	31.9998	38	38
[17:06:39.459413] r = 153 EM = # __T__	153	10	2516.45	0.1155	0.0167	0.1682	0.382		25164.5	1.155	0.167	1.682	3.82
[17:51:28.696380] r = 154 EM = # __T__	154	11	700.773	0.2314	0.1818	0.1818	0.4546		7708.5	2.5454	1.9998	1.9998	5.0006
[19:30:44.466813] r = 155 EM = # __T__	155	118	759.195	0.225	0.1314	0.2373	0.4177		89585	26.55	15.5052	28.0014	49.2886
[17:50:52.147987] r = 156 EM = # __T__	156	11	1	1	1	1	1		11	11	11	11	11
[17:24:38.458701] r = 157 EM = # __T__	157	7	1	1	1	1	1		7	7	7	7	7
[20:03:33.146613] r = 158 EM = # __T__	158	2	61	0.0277	0	0	0		122	0.0554	0	0	0
[20:31:00.909593] r = 159 EM = # __T__	159	31	1664.44	0.5236	0.4516	0.5713	0.6355		51597.5	16.2316	13.9996	17.7103	19.7005
[19:38:54.694124] r = 160 EM = # __T__	160	0	0	0	0	0	0		0	0	0	0	0
[17:17:40.114314] r = 161 EM = # __T__	161	27	1.3704	0.8757	0.7901	0.963	1		37.0008	23.6439	21.3327	26.001	27
[18:33:07.972195] r = 162 EM = # __T__	162	27	2581.93	0.0172	0	0.037	0.037		69712	0.4644	0	0.999	0.999
[18:34:31.542810] r = 163 EM = # __T__	163	3	4	0.3254	0	0.6667	1		12	0.9762	0	2.0001	3
[17:25:58.799171] r = 164 EM = # __T__	164	21	2.6667	0.8322	0.7619	0.9048	0.9524		56.0007	17.4762	15.9999	19.0008	20.0004
[17:12:11.805272] r = 165 EM = # __T__	165	0	0	0	0	0	0		0	0	0	0	0
[19:09:54.668148] r = 166 EM = # __T__	166	124	429.492	0.0765	0.0323	0.0887	0.1452		53257	9.486	4.0052	10.9988	18.0048
[00:53:21.332950] r = 167 EM = # __T__	167	4	1.5	0.8333	0.75	1	1		6	3.3332	3	4	4
[19:46:25.668489] r = 168 EM = # __T__	168	94	1871.02	0.0018	0	0	0		175876	0.1692	0	0	0
[17:36:47.366571] r = 169 EM = # __T__	169	9	1715.61	0.1756	0.1111	0.2222	0.3333		15440.5	1.5804	0.9999	1.9998	2.9997
[17:22:13.345004] r = 170 EM = # __T__	170	91	245.258	0.096	0.0549	0.0879	0.1319		22318.5	8.736	4.9959	7.9989	12.0029
[17:05:54.211499] r = 171 EM = # __T__	171	24	1	1	1	1	1		24	24	24	24	24
[23:33:40.737747] r = 172 EM = # __T__	172	31	168.065	0.0534	0	0.0645	0.0968		5210	1.6554	0	1.9995	3.0008
[22:50:20.230561] r = 173 EM = # __T__	173	235	460.36	0.1159	0.0426	0.1106	0.2695		108185	27.2365	10.011	25.991	63.3325
[19:25:46.910104] r = 174 EM = # __T__	174	46	177.076	0.0103	0	0	0		8145.5	0.4738	0	0	0
[18:37:24.203838] r = 175 EM = # __T__	175	17	1230.71	0.5889	0.5883	0.5883	0.5884		20922	10.0113	10.0011	10.0011	10.0028
[17:38:35.068497] r = 176 EM = # __T__	176	117	4.6752	0.5484	0.3846	0.641	0.8974		546.998	64.1628	44.9982	74.997	104.996
[17:45:37.182383] r = 177 EM = # __T__	177	8	1818.88	0.5418	0.375	0.75	0.75		14551	4.3344	3	6	6
[20:10:54.605153] r = 178 EM = # __T__	178	13	1687.77	0.2179	0	0.368	0.5023		21941	2.8327	0	4.784	6.5299
[19:17:18.318299] r = 179 EM = # __T__	179	317	239.861	0.1207	0.0631	0.1262	0.2177		76036	38.2619	20.0027	40.0054	69.0109
[17:59:05.630830] r = 180 EM = # __T__	180	0	0	0	0	0	0		0	0	0	0	0
[17:40:44.659899] r = 181 EM = # __T__	181	14	22.0714	0.3576	0.2857	0.3571	0.5		309	5.0064	3.9998	4.9994	7
[19:38:20.111431] r = 182 EM = # __T__	182	13	6.7692	0.6895	0.6154	0.7692	0.7692		87.9996	8.9635	8.0002	9.9996	9.9996
[18:04:26.518137] r = 183 EM = # __T__	183	43	170.477	0.8333	0.7209	0.9302	0.9768		7330.5	35.8319	30.9987	39.9986	42.0024
[22:13:48.834170] r = 184 EM = # __T__	184	41	7.0854	0.2715	0.0919	0.2978	0.7241		290.501	11.1315	3.7679	12.2098	29.6881
[18:22:31.831487] r = 185 EM = # __T__	185	11	1343.18	0.3853	0.2727	0.3636	0.6364		14775	4.2383	2.9997	3.9996	7.0004
[22:33:53.012547] r = 186 EM = # __T__	186	494	237.533	0.8384	0.7753	0.8995	0.942		117341	414.17	382.998	444.353	465.348
[21:35:54.031701] r = 187 EM = # __T__	187	158	1.0443	0.9778	0.9557	1	1		164.999	154.492	151.001	158	158
[20:06:16.281832] r = 188 EM = # __T__	188	39	1.4359	0.8184	0.6667	0.9744	1		56.0001	31.9176	26.0013	38.0016	39
[19:58:06.776528] r = 189 EM = # __T__	189	9	1416.22	0.27	0.1111	0.4444	0.4444		12746	2.43	0.9999	3.9996	3.9996
[19:31:15.877131] r = 190 EM = # __T__	190	30	2.25	0.7238	0.5667	0.8833	0.9667		67.5	21.714	17.001	26.499	29.001
[18:17:06.086464] r = 191 EM = # __T__	191	17	127.882	0.566	0.5294	0.5882	0.5882		2174	9.622	8.9998	9.9994	9.9994
[16:00:24.622216] r = 192 EM = # __T__	192	9	811.333	0.3334	0.1111	0.5556	0.8889		7302	3.0006	0.9999	5.0004	8.0001
[16:33:34.732193] r = 193 EM = # __T__	193	25	1.88	0.8892	0.84	0.92	0.96		47	22.23	21	23	24
[18:28:36.352761] r = 194 EM = # __T__	194	97	1742.21	0.2368	0.1426	0.2678	0.4306		168994	22.9696	13.8322	25.9766	41.7682
[16:32:54.081540] r = 195 EM = # __T__	195	42	242.56	0.0401	0	0.0238	0.0597		10187.5	1.6842	0	0.9996	2.5074
[18:54:29.892448] r = 196 EM = # __T__	196	60	11.15	0.587	0.4	0.75	0.9167		669	35.22	24	45	55.002
[16:59:44.568314] r = 197 EM = # __T__	197	137	1.0438	0.9781	0.9562	1	1		143.001	134	130.999	137	137
[16:04:22.803977] r = 198 EM = # __T__	198	63	6.4127	0.3294	0.1111	0.4286	0.8254		404	20.7522	6.9993	27.0018	52.0002
[18:52:19.569995] r = 199 EM = # __T__	199	160	839.069	0.0188	0	0.0188	0.05		134251	3.008	0	3.008	8
[16:25:29.522463] r = 200 EM = # __T__	200	8	58.3125	0.2723	0.125	0.375	0.4937		466.5	2.1784	1	3	3.9496
[16:55:13.864943] r = 201 EM = # __T__	201	55	825.136	0.4509	0.3662	0.4805	0.6545		45382.5	24.7995	20.141	26.4275	35.9975
[17:32:32.429261] r = 202 EM = # __T__	202	16	143.156	0.1626	0.125	0.125	0.1875		2290.5	2.6016	2	2	3
[19:22:45.888810] r = 203 EM = # __T__	203	1	1	1	1	1	1		1	1	1	1	1
[21:57:58.509088] r = 204 EM = # __T__	204	266	554.259	0.0301	0.0113	0.0301	0.0639		147433	8.0066	3.0058	8.0066	16.9974
[16:38:59.139640] r = 205 EM = # __T__	205	85	1099.68	0.0474	0	0.0235	0.1412		93473	4.029	0	1.9975	12.002
[18:27:00.452146] r = 206 EM = # __T__	206	6	4.1667	0.5097	0.3333	0.6667	1		25.0002	3.0582	1.9998	4.0002	6
[18:04:00.610138] r = 207 EM = # __T__	207	9	3.6667	0.3122	0	0.4444	1		33.0003	2.8098	0	3.9996	9
[16:28:41.202226] r = 208 EM = # __T__	208	0	0	0	0	0	0		0	0	0	0	0
[18:50:28.644167] r = 209 EM = # __T__	209	7	821.214	0.0082	0	0	0		5748.5	0.0574	0	0	0
[04:03:23.542697] r = 210 EM = # __T__	210	7	1069.57	0.6429	0.4286	0.8571	0.8571		7487	4.5003	3.0002	5.9997	5.9997
[16:14:46.069282] r = 211 EM = # __T__	211	16	2.8125	0.6403	0.5	0.6875	1		45	10.2448	8	11	16
[18:49:27.239886] r = 212 EM = # __T__	212	20	1.05	0.975	0.95	1	1		21	19.5	19	20	20
[17:58:07.759692] r = 213 EM = # __T__	213	127	4.9803	0.5373	0.378	0.6322	0.8583		632.498	68.2371	48.006	80.2894	109.004
[23:19:16.250298] r = 214 EM = # __T__	214	5	1.4	0.8	0.6	1	1		7	4	3	5	5
[17:20:51.939331] r = 215 EM = # __T__	215	214	102.549	0.303	0.1776	0.3364	0.6051		21945.5	64.842	38.0064	71.9896	129.491
[17:17:22.595291] r = 216 EM = # __T__	216	167	30.1377	0.2134	0.0838	0.2455	0.509		5033	35.6378	13.9946	40.9985	85.003
[17:11:45.913667] r = 217 EM = # __T__	217	0	0	0	0	0	0		0	0	0	0	0
[18:09:13.344372] r = 218 EM = # __T__	218	18	811.167	0.6533	0.5556	0.7222	0.8611		14601	11.7594	10.0008	12.9996	15.4998
[19:40:33.637631] r = 219 EM = # __T__	219	4	1	1	1	1	1		4	4	4	4	4
[17:55:11.599780] r = 220 EM = # __T__	220	3	2.3333	0.4444	0	1	1		6.9999	1.3332	0	3	3
[18:14:17.422755] r = 221 EM = # __T__	221	34	1256.79	0.026	0	0.0294	0.0588		42731	0.884	0	0.9996	1.9992
[20:13:55.577336] r = 222 EM = # __T__	222	0	0	0	0	0	0		0	0	0	0	0
[20:36:49.776687] r = 223 EM = # __T__	223	3	2	0.6111	0.3333	1	1		6	1.8333	0.9999	3	3
[20:40:49.432730] r = 224 EM = # __T__	224	77	1425.89	0.0491	0.039	0.0403	0.0754		109793	3.7807	3.003	3.1031	5.8058
[17:31:22.150856] r = 225 EM = # __T__	225	12	1.4583	0.7708	0.5417	1	1		17.4996	9.2496	6.5004	12	12
[18:42:24.923842] r = 226 EM = # __T__	226	13	24.6923	0.5247	0.3846	0.6154	0.6923		321	6.8211	4.9998	8.0002	8.9999
[19:08:28.576517] r = 227 EM = # __T__	227	0	0	0	0	0	0		0	0	0	0	0
[17:46:49.480060] r = 228 EM = # __T__	228	35	783.729	0.1846	0.1143	0.2	0.3429		27430.5	6.461	4.0005	7	12.0015
[17:24:02.202801] r = 229 EM = # __T__	229	20	2655.6	0.0121	0	0	0.05		53112	0.242	0	0	1
[19:27:31.655180] r = 230 EM = # __T__	230	96	1.6979	0.832	0.75	0.8854	1		162.998	79.872	72	84.9984	96
[01:01:37.471153] r = 231 EM = # __T__	231	5	29	0.2552	0.2	0.2	0.6		145	1.276	1	1	3
[19:57:41.039437] r = 232 EM = # __T__	232	16	1.8125	0.7693	0.625	0.9375	1		29	12.3088	10	15	16
[22:06:56.787147] r = 233 EM = # __T__	233	84	93.4345	0.5206	0.381	0.6071	0.8214		7848.5	43.7304	32.004	50.9964	68.9976
[17:54:20.700237] r = 234 EM = # __T__	234	60	1.0167	0.9917	0.9833	1	1		61.002	59.502	58.998	60	60
[17:15:48.234333] r = 235 EM = # __T__	235	15	974.4	0.0155	0	0	0.0058		14616	0.2325	0	0	0.087
[23:37:08.427962] r = 236 EM = # __T__	236	3	1	1	1	1	1		3	3	3	3	3
[23:22:50.269781] r = 237 EM = # __T__	237	39	1338.33	0.2304	0.0769	0.3077	0.4872		52195	8.9856	2.9991	12.0003	19.0008
[19:39:11.819771] r = 238 EM = # __T__	238	90	1395.31	0.0058	0	0	0		125577	0.522	0	0	0
[21:49:03.200924] r = 239 EM = # __T__	239	1311	1164.09	0.0167	0.0038	0.0145	0.0374		1.52612e+06	21.8937	4.9818	19.0095	49.0314
[18:09:44.504542] r = 240 EM = # __T__	240	13	399.654	0.0722	0	0.0769	0.1538		5195.5	0.9386	0	0.9997	1.9994
[18:42:54.697645] r = 241 EM = # __T__	241	722	538.123	0.0297	0.0139	0.0235	0.0457		388525	21.4434	10.0358	16.967	32.9954
[20:46:34.250009] r = 242 EM = # __T__	242	1	1	1	1	1	1		1	1	1	1	1
[19:40:42.525151] r = 243 EM = # __T__	243	22	2693.95	0.0833	0.0455	0.0455	0.1818		59267	1.8326	1.001	1.001	3.9996
[19:31:16.642991] r = 244 EM = # __T__	244	73	264.349	0.2315	0.1507	0.2466	0.411		19297.5	16.8995	11.0011	18.0018	30.003
[17:48:53.210775] r = 245 EM = # __T__	245	2	18.5	0.0551	0	0	0		37	0.1102	0	0	0
[20:16:36.534478] r = 246 EM = # __T__	246	132	1724.05	0.1233	0.053	0.1515	0.2576		227574	16.2756	6.996	19.998	34.0032
[19:53:32.737274] r = 247 EM = # __T__	247	217	429.726	0.2247	0.1106	0.2535	0.4492		93250.5	48.7599	24.0002	55.0095	97.4764
[23:20:49.259593] r = 248 EM = # __T__	248	41	550.195	0.3667	0.2202	0.4167	0.6655		22558	15.0347	9.0282	17.0847	27.2855
[22:14:55.799430] r = 249 EM = # __T__	249	34	982.838	0.0463	0.0294	0.0588	0.0588		33416.5	1.5742	0.9996	1.9992	1.9992
[22:40:39.361540] r = 250 EM = # __T__	250	105	2.6048	0.604	0.3451	0.8638	0.9641		273.504	63.42	36.2355	90.699	101.23
[22:16:11.782009] r = 251 EM = # __T__	251	10	36.6	0.0647	0	0	0		366	0.647	0	0	0
[20:12:39.632009] r = 252 EM = # __T__	252	11	1323.73	0.6625	0.6364	0.6364	0.8183		14561	7.2875	7.0004	7.0004	9.0013
[20:25:15.924045] r = 253 EM = # __T__	253	86	471.791	0.2313	0.1628	0.2609	0.3237		40574	19.8918	14.0008	22.4374	27.8382
[22:51:10.611957] r = 254 EM = # __T__	254	314	263.081	0.1512	0.0987	0.1178	0.2707		82607.5	47.4768	30.9918	36.9892	84.9998
[18:37:36.548450] r = 255 EM = # __T__	255	13	50.3077	0.1422	0	0.1538	0.3846		654	1.8486	0	1.9994	4.9998
[16:49:12.249423] r = 256 EM = # __T__	256	22	722.477	0.2138	0.1818	0.2273	0.2273		15894.5	4.7036	3.9996	5.0006	5.0006
[16:59:21.692721] r = 257 EM = # __T__	257	26	1027.31	0.2917	0.0769	0.4615	0.7692		26710	7.5842	1.9994	11.999	19.9992
[18:53:08.895573] r = 258 EM = # __T__	258	24	321.708	0.3046	0.1667	0.375	0.5833		7721	7.3104	4.0008	9	13.9992
[18:36:19.777426] r = 259 EM = # __T__	259	305	2020.26	0.0425	0.0311	0.0361	0.0548		616179	12.9625	9.4855	11.0105	16.714
[19:05:27.077567] r = 260 EM = # __T__	260	60	1.6333	0.7111	0.45	1	1		97.998	42.666	27	60	60
[17:11:03.277617] r = 261 EM = # __T__	261	14	1.1429	0.9286	0.8571	1	1		16.0006	13.0004	11.9994	14	14
[16:26:09.046908] r = 262 EM = # __T__	262	8	107.438	0.6673	0.625	0.75	0.75		859.5	5.3384	5	6	6
[19:21:11.762152] r = 263 EM = # __T__	263	0	0	0	0	0	0		0	0	0	0	0
[16:39:44.821804] r = 264 EM = # __T__	264	16	136.375	0.0965	0.0625	0.0625	0.125		2182	1.544	1	1	2
[17:18:10.810811] r = 265 EM = # __T__	265	24	752.521	0.215	0.125	0.2917	0.3333		18060.5	5.16	3	7.0008	7.9992
[18:18:20.966821] r = 266 EM = # __T__	266	3	35.6667	0.0963	0	0	0.3333		107	0.2889	0	0	0.9999
[22:28:29.682061] r = 267 EM = # __T__	267	170	3649.19	0.0215	0.0147	0.0176	0.0294		620363	3.655	2.499	2.992	4.998
[22:53:37.423292] r = 268 EM = # __T__	268	330	1504.33	0.5522	0.4768	0.5926	0.6926		496430	182.226	157.344	195.558	228.558
[19:23:48.594569] r = 269 EM = # __T__	269	11	74.6818	0.5108	0.4545	0.5455	0.5455		821.5	5.6188	4.9995	6.0005	6.0005
[18:35:03.059959] r = 270 EM = # __T__	270	24	1.125	0.9514	0.9167	1	1		27	22.8336	22.0008	24	24
[18:10:28.240603] r = 271 EM = # __T__	271	13	3.3462	0.5688	0.4615	0.5	1		43.5006	7.3944	5.9995	6.5	13
[02:52:38.716151] r = 272 EM = # __T__	272	151	167.013	0.0433	0.0199	0.0199	0.0728		25219	6.5383	3.0049	3.0049	10.9928
[19:01:14.906029] r = 273 EM = # __T__	273	22	334.045	0.7405	0.697	0.7424	0.8409		7349	16.291	15.334	16.3328	18.4998
[04:32:07.118766] r = 274 EM = # __T__	274	7	3205.71	0.008	0	0	0		22440	0.056	0	0	0
[16:50:35.066285] r = 275 EM = # __T__	275	14	268.393	0.0211	0	0	0.0714		3757.5	0.2954	0	0	0.9996
[23:16:35.360182] r = 276 EM = # __T__	276	311	296.191	0.1292	0.0649	0.1173	0.2475		92115.5	40.1812	20.1839	36.4803	76.9725
[18:42:35.301213] r = 277 EM = # __T__	277	29	181.948	0.077	0.0345	0.069	0.1379		5276.5	2.233	1.0005	2.001	3.9991
[23:47:27.778561] r = 278 EM = # __T__	278	3	2725.67	0.0207	0	0	0		8177	0.0621	0	0	0
[17:33:05.369241] r = 279 EM = # __T__	279	48	127.531	0.1673	0.0833	0.1875	0.375		6121.5	8.0304	3.9984	9	18
[17:33:27.544748] r = 280 EM = # __T__	280	11	6014.5	0.0061	0	0	0.0119		66159.5	0.0671	0	0	0.1309
[17:19:46.112532] r = 281 EM = # __T__	281	11	1.3636	0.8182	0.6364	1	1		14.9996	9.0002	7.0004	11	11
[19:12:22.994565] r = 282 EM = # __T__	282	16	912.844	0.6662	0.5	0.8125	0.875		14605.5	10.6592	8	13	14
[23:11:04.542782] r = 283 EM = # __T__	283	19	582.947	0.3554	0.2105	0.3684	0.5799		11076	6.7526	3.9995	6.9996	11.0181
[18:05:04.193316] r = 284 EM = # __T__	284	29	3033.33	0.135	0.0517	0.1322	0.3404		87966.5	3.915	1.4993	3.8338	9.8716
[18:25:21.827768] r = 285 EM = # __T__	285	23	2.2609	0.7067	0.5652	0.8261	1		52.0007	16.2541	12.9996	19.0003	23
[20:52:23.505936] r = 286 EM = # __T__	286	40	24.625	0.17	0.075	0.15	0.4		985	6.8	3	6	16
[22:36:34.331165] r = 287 EM = # __T__	287	152	240.447	0.0803	0.0395	0.0724	0.1382		36548	12.2056	6.004	11.0048	21.0064
[20:49:24.305918] r = 288 EM = # __T__	288	20	3.6	0.4622	0.2	0.9	0.95		72	9.244	4	18	19
[17:46:47.378846] r = 289 EM = # __T__	289	38	60.7368	0.1443	0	0.1316	0.5526		2308	5.4834	0	5.0008	20.9988
[19:10:35.989439] r = 290 EM = # __T__	290	13	3.8462	0.3789	0.1538	0.5385	1		50.0006	4.9257	1.9994	7.0005	13
[20:07:37.703782] r = 291 EM = # __T__	291	10	88.3	0.0167	0	0	0		883	0.167	0	0	0
[18:18:21.508788] r = 292 EM = # __T__	292	31	33.8387	0.0665	0	0	0.2258		1049	2.0615	0	0	6.9998
[17:40:16.361504] r = 293 EM = # __T__	293	17	6.7059	0.3277	0.1176	0.4706	0.8235		114	5.5709	1.9992	8.0002	13.9995
[19:39:21.046387] r = 294 EM = # __T__	294	11	1189.41	0.0135	0	0	0		13083.5	0.1485	0	0	0
[01:56:04.896509] r = 295 EM = # __T__	295	402	2469.58	0.0615	0.0348	0.0746	0.097		992772	24.723	13.9896	29.9892	38.994
[21:50:07.662708] r = 296 EM = # __T__	296	664	47.0896	0.2868	0.1842	0.3095	0.5018		31267.5	190.435	122.309	205.508	333.195
[23:38:37.044471] r = 297 EM = # __T__	297	100	618.7	0.0436	0.02	0.0406	0.1026		61870	4.36	2	4.06	10.26
[18:33:33.374628] r = 298 EM = # __T__	298	55	21.5091	0.5	0.3818	0.5818	0.697		1183	27.5	20.999	31.999	38.335
[17:25:58.440958] r = 299 EM = # __T__	299	77	1000.53	0.0159	0	0	0.0476		77040.5	1.2243	0	0	3.6652
[23:48:13.272780] r = 300 EM = # __T__	300	2	233	0.0046	0	0	0		466	0.0092	0	0	0
[23:43:03.386546] r = 301 EM = # __T__	301	0	0	0	0	0	0		0	0	0	0	0
[19:45:02.720929] r = 302 EM = # __T__	302	4	4.625	0.3808	0.25	0.25	1		18.5	1.5232	1	1	4
[22:30:58.619965] r = 303 EM = # __T__	303	18	55.3889	0.3227	0.1667	0.3889	0.6111		997	5.8086	3.0006	7.0002	10.9998
[19:24:27.386552] r = 304 EM = # __T__	304	3	380.667	0.0029	0	0	0		1142	0.0087	0	0	0
[19:18:13.455303] r = 305 EM = # __T__	305	8	9.875	0.2951	0.125	0.5	0.75		79	2.3608	1	4	6
[21:18:33.158905] r = 306 EM = # __T__	306	3	11.3333	0.0905	0	0	0.3333		33.9999	0.2715	0	0	0.9999
[19:58:44.766950] r = 307 EM = # __T__	307	25	14.32	0.2795	0.12	0.32	0.56		358	6.9875	3	8	14
[19:46:09.989905] r = 308 EM = # __T__	308	53	1	1	1	1	1		53	53	53	53	53
[18:13:51.590415] r = 309 EM = # __T__	309	9	719.278	0.091	0	0.1111	0.3333		6473.5	0.819	0	0.9999	2.9997
[20:26:15.057478] r = 310 EM = # __T__	310	11	25.0455	0.6597	0.4545	0.8182	0.9091		275.5	7.2567	4.9995	9.0002	10.0001
[20:02:22.936852] r = 311 EM = # __T__	311	1	37	0.027	0	0	0		37	0.027	0	0	0
[05:13:05.771447] r = 312 EM = # __T__	312	1447	62.1399	0.163	0.0774	0.1742	0.3217		89916.4	235.861	111.998	252.067	465.5
[22:26:09.248880] r = 313 EM = # __T__	313	20	900.65	0.0743	0	0.1	0.18		18013	1.486	0	2	3.6
[23:50:25.157091] r = 314 EM = # __T__	314	10	2.5	0.4667	0.1	0.8	1		25	4.667	1	8	10
[22:35:17.552603] r = 315 EM = # __T__	315	0	0	0	0	0	0		0	0	0	0	0
[20:29:46.906287] r = 316 EM = # __T__	316	84	26.7143	0.4584	0.4048	0.4643	0.5476		2244	38.5056	34.0032	39.0012	45.9984
[20:40:58.025919] r = 317 EM = # __T__	317	323	4.9706	0.4804	0.3065	0.5449	0.9319		1605.5	155.169	98.9995	176.003	301.004
[23:49:54.995487] r = 318 EM = # __T__	318	98	696.439	0.0455	0.0204	0.0408	0.0918		68251	4.459	1.9992	3.9984	8.9964
[21:44:29.590883] r = 319 EM = # __T__	319	836	652.694	0.0746	0.0407	0.0754	0.1459		545652	62.3656	34.0252	63.0344	121.972
[18:06:58.985594] r = 320 EM = # __T__	320	1	26	0.0385	0	0	0		26	0.0385	0	0	0
[17:08:05.317315] r = 321 EM = # __T__	321	21	3.381	0.5266	0.2857	0.6667	0.9524		71.001	11.0586	5.9997	14.0007	20.0004
[19:18:54.286167] r = 322 EM = # __T__	322	53	2799.74	0.0239	0	0.0189	0.0756		148386	1.2667	0	1.0017	4.0068
[22:18:59.748414] r = 323 EM = # __T__	323	92	2863.32	0.0369	0.0109	0.0326	0.0978		263425	3.3948	1.0028	2.9992	8.9976
[19:17:13.159574] r = 324 EM = # __T__	324	43	3.8256	0.4009	0.1705	0.593	0.9767		164.501	17.2387	7.3315	25.499	41.9981
[19:53:31.039484] r = 325 EM = # __T__	325	321	1931.48	0.08	0.0343	0.0654	0.1713		620005	25.68	11.0103	20.9934	54.9873
[16:39:06.042173] r = 326 EM = # __T__	326	17	10.7647	0.6086	0.5294	0.6471	0.7059		183	10.3462	8.9998	11.0007	12.0003
[19:30:58.683914] r = 327 EM = # __T__	327	16	1.6562	0.7604	0.5938	0.9375	1		26.4992	12.1664	9.5008	15	16
[17:03:23.616296] r = 328 EM = # __T__	328	27	2.5185	0.6724	0.5185	0.7407	1		67.9995	18.1548	13.9995	19.9989	27
[17:36:09.387056] r = 329 EM = # __T__	329	9	241.722	0.0282	0	0	0.1111		2175.5	0.2538	0	0	0.9999
[18:29:57.340811] r = 330 EM = # __T__	330	0	0	0	0	0	0		0	0	0	0	0
[23:09:23.515319] r = 331 EM = # __T__	331	10	413.95	0.227	0.2	0.2	0.2		4139.5	2.27	2	2	2
[23:06:06.392622] r = 332 EM = # __T__	332	11	4.7273	0.3602	0.1818	0.2727	1		52.0003	3.9622	1.9998	2.9997	11
[19:42:34.150808] r = 333 EM = # __T__	333	20	2.4	0.6645	0.475	0.8	0.95		48	13.29	9.5	16	19
[19:36:58.684397] r = 334 EM = # __T__	334	80	4859.7	0.0358	0.0125	0.0125	0.0875		388776	2.864	1	1	7
[18:24:59.000965] r = 335 EM = # __T__	335	3	4.3333	0.2907	0	0.3333	1		12.9999	0.8721	0	0.9999	3
[03:30:58.482602] r = 336 EM = # __T__	336	4	289.75	0.0637	0	0	0.25		1159	0.2548	0	0	1
[19:13:39.230267] r = 337 EM = # __T__	337	2	17	0.1172	0	0	0.5		34	0.2344	0	0	1
[04:40:31.796575] r = 338 EM = # __T__	338	21	1844.95	0.0508	0.0238	0.0476	0.0725		38744	1.0668	0.4998	0.9996	1.5225
[18:49:58.643040] r = 339 EM = # __T__	339	26	507.423	0.0258	0	0.0385	0.0769		13193	0.6708	0	1.001	1.9994
[23:53:28.702507] r = 340 EM = # __T__	340	34	442.294	0.232	0.1177	0.2059	0.5295		15038	7.888	4.0018	7.0006	18.003
[20:26:32.640248] r = 341 EM = # __T__	341	1	3	0.3333	0	1	1		3	0.3333	0	1	1
[00:55:35.539285] r = 342 EM = # __T__	342	287	3.1882	0.6329	0.4913	0.6899	0.9408		915.013	181.642	141.003	198.001	270.01
[17:57:46.348977] r = 343 EM = # __T__	343	20	26.55	0.2988	0.1523	0.3568	0.5977		531	5.976	3.046	7.136	11.954
[17:47:58.772148] r = 344 EM = # __T__	344	20	1.925	0.5833	0.2	0.95	1		38.5	11.666	4	19	20
[19:26:10.231208] r = 345 EM = # __T__	345	858	34.2768	0.2579	0.127	0.2774	0.5385		29409.5	221.278	108.966	238.009	462.033
[19:19:42.481354] r = 346 EM = # __T__	346	31	1173.77	0.4524	0.2581	0.5645	0.867		36387	14.0244	8.0011	17.4995	26.877
[00:50:28.879732] r = 347 EM = # __T__	347	251	37.8327	0.4544	0.3207	0.5139	0.7564		9496.01	114.054	80.4957	128.989	189.856
[19:06:51.586145] r = 348 EM = # __T__	348	606	348.239	0.0238	0.0033	0.0198	0.0561		211033	14.4228	1.9998	11.9988	33.9966
[18:31:33.561266] r = 349 EM = # __T__	349	12	1.0417	0.9792	0.9583	1	1		12.5004	11.7504	11.4996	12	12
[21:00:49.595723] r = 350 EM = # __T__	350	41	1024.24	0.0657	0.0244	0.0488	0.0732		41994	2.6937	1.0004	2.0008	3.0012
[07:26:02.019006] r = 351 EM = # __T__	351	131	477.328	0.0269	0.0076	0.0153	0.0458		62530	3.5239	0.9956	2.0043	5.9998
[20:57:12.325497] r = 352 EM = # __T__	352	13	3378.19	0.0411	0.0077	0.0231	0.0855		43916.5	0.5343	0.1001	0.3003	1.1115
[18:21:43.934444] r = 353 EM = # __T__	353	48	607.312	0.827	0.7917	0.8542	0.9167		29151	39.696	38.0016	41.0016	44.0016
[19:44:29.485686] r = 354 EM = # __T__	354	70	1.3286	0.8921	0.8143	0.9571	1		93.002	62.447	57.001	66.997	70
[21:08:26.535167] r = 355 EM = # __T__	355	153	9.7418	0.4376	0.281	0.5033	0.7582		1490.5	66.9528	42.993	77.0049	116.005
[19:00:56.125357] r = 356 EM = # __T__	356	34	26.5294	0.2231	0.1176	0.2647	0.4314		902	7.5854	3.9984	8.9998	14.6676
[18:40:42.593348] r = 357 EM = # __T__	357	60	1289.23	0.0974	0.0333	0.1	0.2		77354	5.844	1.998	6	12
[20:05:49.477391] r = 358 EM = # __T__	358	53	16.3774	0.1779	0.0755	0.1509	0.3962		868.002	9.4287	4.0015	7.9977	20.9986
[03:15:02.237645] r = 359 EM = # __T__	359	9	551.556	0.0106	0	0	0		4964	0.0954	0	0	0
[22:10:28.932115] r = 360 EM = # __T__	360	258	6.5407	0.4723	0.3372	0.5233	0.7829		1687.5	121.853	86.9976	135.011	201.988
[00:53:24.268211] r = 361 EM = # __T__	361	91	251.028	0.1559	0.0886	0.1668	0.2894		22843.5	14.1869	8.0626	15.1788	26.3354
[22:25:00.997573] r = 362 EM = # __T__	362	1067	463.537	0.0494	0.0197	0.0422	0.0937		494594	52.7098	21.0199	45.0274	99.9779
[19:19:57.691208] r = 363 EM = # __T__	363	346	678.358	0.0058	0	0.0029	0.0029		234712	2.0068	0	1.0034	1.0034
[00:10:40.670930] r = 364 EM = # __T__	364	12	3024.21	0.105	0	0	0.5		36290.5	1.26	0	0	6
[00:28:07.507950] r = 365 EM = # __T__	365	22	1.8636	0.7061	0.5	0.8636	1		40.9992	15.5342	11	18.9992	22
[20:24:48.937528] r = 366 EM = # __T__	366	121	16.0331	0.3072	0.1736	0.3264	0.6116		1940.01	37.1712	21.0056	39.4944	74.0036
[23:04:49.704514] r = 367 EM = # __T__	367	53	541.764	0.1409	0.1321	0.1321	0.1509		28713.5	7.4677	7.0013	7.0013	7.9977
[20:56:10.318623] r = 368 EM = # __T__	368	32	104.469	0.0762	0.0625	0.0625	0.0625		3343	2.4384	2	2	2
[19:25:13.466678] r = 369 EM = # __T__	369	15	12.2667	0.2888	0.1333	0.3333	0.5333		184	4.332	1.9995	4.9995	7.9995
[23:50:16.814629] r = 370 EM = # __T__	370	32	560.5	0.3634	0.25	0.4062	0.5938		17936	11.6288	8	12.9984	19.0016
[20:05:40.083170] r = 371 EM = # __T__	371	29	266.621	0.2841	0.1724	0.3075	0.4228		7732	8.2389	4.9996	8.9175	12.2612
[20:05:10.495674] r = 372 EM = # __T__	372	94	58.3723	0.2096	0.1223	0.2234	0.383		5487	19.7024	11.4962	20.9996	36.002
[18:21:25.809724] r = 373 EM = # __T__	373	63	3.4286	0.5652	0.381	0.6349	0.9365		216.002	35.6076	24.003	39.9987	58.9995
[20:53:54.940092] r = 374 EM = # __T__	374	7	2142.36	0.3596	0.2857	0.4286	0.4286		14996.5	2.5172	1.9999	3.0002	3.0002
[20:23:51.284156] r = 375 EM = # __T__	375	0	0	0	0	0	0		0	0	0	0	0
[05:22:34.605145] r = 376 EM = # __T__	376	16	1	1	1	1	1		16	16	16	16	16
[22:52:29.644840] r = 377 EM = # __T__	377	13	1605.27	0.0721	0	0.0769	0.3846		20868.5	0.9373	0	0.9997	4.9998
[00:19:44.139646] r = 378 EM = # __T__	378	16	1496.88	0.0076	0	0	0		23950	0.1216	0	0	0
[23:39:50.155659] r = 379 EM = # __T__	379	13	5.8462	0.6906	0.6154	0.7692	0.7692		76.0006	8.9778	8.0002	9.9996	9.9996
[21:12:39.730039] r = 380 EM = # __T__	380	26	2293.73	0.1553	0.1154	0.1539	0.2693		59637	4.0378	3.0004	4.0014	7.0018
[20:47:20.359594] r = 381 EM = # __T__	381	0	0	0	0	0	0		0	0	0	0	0
[00:09:22.479964] r = 382 EM = # __T__	382	38	34.7632	0.3079	0.1579	0.4211	0.5526		1321	11.7002	6.0002	16.0018	20.9988
[22:23:41.118785] r = 383 EM = # __T__	383	11	114.091	0.3317	0.2727	0.2727	0.5455		1255	3.6487	2.9997	2.9997	6.0005
[18:23:52.125621] r = 384 EM = # __T__	384	50	2035.23	0.0575	0	0.06	0.18		101762	2.875	0	3	9
[00:59:51.512617] r = 385 EM = # __T__	385	436	1076.43	0.0118	0	0.0092	0.0206		469325	5.1448	0	4.0112	8.9816
[21:01:30.670308] r = 386 EM = # __T__	386	78	1739.29	0.0036	0	0	0		135665	0.2808	0	0	0
[22:50:13.987132] r = 387 EM = # __T__	387	46	957.402	0.1712	0.0435	0.2609	0.5217		44040.5	7.8752	2.001	12.0014	23.9982
[19:32:48.432950] r = 388 EM = # __T__	388	2	44	0.024	0	0	0		88	0.048	0	0	0
[20:01:23.417234] r = 389 EM = # __T__	389	38	6.5789	0.3489	0.1842	0.3158	0.8421		249.998	13.2582	6.9996	12.0004	31.9998
[16:55:54.052035] r = 390 EM = # __T__	390	10	2919.4	0.1808	0.1	0.2	0.42		29194	1.808	1	2	4.2
[19:43:48.136971] r = 391 EM = # __T__	391	11	1010.23	0.1358	0	0.1818	0.4545		11112.5	1.4938	0	1.9998	4.9995
[18:54:30.767697] r = 392 EM = # __T__	392	118	797.14	0.0788	0.0424	0.0678	0.1339		94062.5	9.2984	5.0032	8.0004	15.8002
[17:47:05.409471] r = 393 EM = # __T__	393	11	43.2727	0.2789	0.1818	0.3636	0.4545		476	3.0679	1.9998	3.9996	4.9995
[19:01:54.713481] r = 394 EM = # __T__	394	7	97.8571	0.3309	0.2857	0.2857	0.5714		685	2.3163	1.9999	1.9999	3.9998
[23:26:10.551817] r = 395 EM = # __T__	395	2	461.5	0.0029	0	0	0		923	0.0058	0	0	0
[00:51:30.311509] r = 396 EM = # __T__	396	31	1961.31	0.2962	0.1935	0.3548	0.4516		60800.5	9.1822	5.9985	10.9988	13.9996
[19:56:10.589347] r = 397 EM = # __T__	397	0	0	0	0	0	0		0	0	0	0	0
[19:51:51.901404] r = 398 EM = # __T__	398	27	1.8148	0.8254	0.7407	0.8624	1		48.9996	22.2858	19.9989	23.2848	27
[18:49:09.628981] r = 399 EM = # __T__	399	27	270.574	0.8685	0.8148	0.8889	0.963		7305.5	23.4495	21.9996	24.0003	26.001
[03:40:23.694234] r = 400 EM = # __T__	400	3	18	0.1285	0	0	0.6667		54	0.3855	0	0	2.0001
[19:24:24.537219] r = 401 EM = # __T__	401	21	11	0.5281	0.2857	0.7619	0.8095		231	11.0901	5.9997	15.9999	16.9995
[04:46:44.748914] r = 402 EM = # __T__	402	0	0	0	0	0	0		0	0	0	0	0
[19:48:56.033673] r = 403 EM = # __T__	403	124	9.1169	0.476	0.3387	0.5081	0.7583		1130.5	59.024	41.9988	63.0044	94.0292
[03:11:50.011471] r = 404 EM = # __T__	404	4	1	1	1	1	1		4	4	4	4	4
[20:50:35.249913] r = 405 EM = # __T__	405	94	319.702	0.2164	0.0745	0.2553	0.5213		30052	20.3416	7.003	23.9982	49.0022
[01:39:59.534406] r = 406 EM = # __T__	406	9	1313.61	0.0551	0	0	0.2223		11822.5	0.4959	0	0	2.0007
[18:34:18.649598] r = 407 EM = # __T__	407	91	2.2857	0.7525	0.6264	0.8681	0.967		207.999	68.4775	57.0024	78.9971	87.997
[18:07:23.899435] r = 408 EM = # __T__	408	24	16.875	0.2643	0	0.7083	0.8333		405	6.3432	0	16.9992	19.9992
[19:56:54.425994] r = 409 EM = # __T__	409	31	338.613	0.2364	0.0968	0.3226	0.5161		10497	7.3284	3.0008	10.0006	15.9991
[21:28:36.397860] r = 410 EM = # __T__	410	235	277.562	0.0804	0.0255	0.0638	0.1943		65227	18.894	5.9925	14.993	45.6605
[01:12:47.920878] r = 411 EM = # __T__	411	46	1.1304	0.9814	0.9783	0.9783	1		51.9984	45.1444	45.0018	45.0018	46
[19:15:10.165984] r = 412 EM = # __T__	412	17	431.029	0.8143	0.7647	0.8235	0.9412		7327.5	13.8431	12.9999	13.9995	16.0004
[18:49:55.074000] r = 413 EM = # __T__	413	117	2.4615	0.7398	0.6325	0.812	0.9402		287.995	86.5566	74.0025	95.004	110.003
[21:23:47.814811] r = 414 EM = # __T__	414	8	6	0.5268	0.375	0.625	0.7917		48	4.2144	3	5	6.3336
[07:36:20.065052] r = 415 EM = # __T__	415	13	587.423	0.0958	0	0.1538	0.2308		7636.5	1.2454	0	1.9994	3.0004
[22:37:06.310462] r = 416 EM = # __T__	416	317	12.3912	0.4188	0.2934	0.4479	0.7066		3928.01	132.76	93.0078	141.984	223.992
[18:36:45.309164] r = 417 EM = # __T__	417	0	0	0	0	0	0		0	0	0	0	0
[21:00:41.889270] r = 418 EM = # __T__	418	14	223.964	0.0746	0	0.0714	0.2143		3135.5	1.0444	0	0.9996	3.0002
[22:39:08.296273] r = 419 EM = # __T__	419	13	11	0.5557	0.4615	0.6154	0.7692		143	7.2241	5.9995	8.0002	9.9996
[19:12:07.027441] r = 420 EM = # __T__	420	43	1407.72	0.0393	0	0.0233	0.1163		60532	1.6899	0	1.0019	5.0009
[18:48:17.547287] r = 421 EM = # __T__	421	41	5.6341	0.3273	0.1159	0.4024	0.8516		230.998	13.4193	4.7519	16.4984	34.9156
[20:34:52.523577] r = 422 EM = # __T__	422	11	1332.18	0.2391	0.0909	0.2727	0.5455		14654	2.6301	0.9999	2.9997	6.0005
[09:41:49.264546] r = 423 EM = # __T__	423	494	844.707	0.0676	0.0263	0.083	0.1336		417286	33.3944	12.9922	41.002	65.9984
[03:54:32.948852] r = 424 EM = # __T__	424	158	148.335	0.0262	0	0.0127	0.0506		23437	4.1396	0	2.0066	7.9948
[01:11:05.579838] r = 425 EM = # __T__	425	39	1128.4	0.0179	0	0.0256	0.0513		44007.5	0.6981	0	0.9984	2.0007
[22:53:15.965257] r = 426 EM = # __T__	426	9	1623.5	0.5452	0.5	0.5556	0.5761		14611.5	4.9068	4.5	5.0004	5.1849
[20:02:14.732805] r = 427 EM = # __T__	427	30	2.4167	0.5431	0.2278	0.8436	1		72.501	16.293	6.834	25.308	30
[01:19:10.291933] r = 428 EM = # __T__	428	17	301.794	0.1495	0.0588	0.1765	0.2941		5130.5	2.5415	0.9996	3.0005	4.9997
[00:49:33.770948] r = 429 EM = # __T__	429	9	1228.39	0.0033	0	0	0		11055.5	0.0297	0	0	0
[20:53:13.459892] r = 430 EM = # __T__	430	25	24.36	0.143	0	0	0.84		609	3.575	0	0	21
[23:29:31.052139] r = 431 EM = # __T__	431	97	3413.31	0.0516	0.0191	0.0452	0.0944		331092	5.0052	1.8527	4.3844	9.1568
[21:20:45.161681] r = 432 EM = # __T__	432	42	7	0.312	0.1607	0.2958	0.6933		294	13.104	6.7494	12.4236	29.1186
[19:45:29.442832] r = 433 EM = # __T__	433	60	455.325	0.3309	0.2167	0.2833	0.6667		27319.5	19.854	13.002	16.998	40.002
[00:16:20.959304] r = 434 EM = # __T__	434	137	402.372	0.1971	0.1387	0.2117	0.292		55125	27.0027	19.0019	29.0029	40.004
[20:39:47.399163] r = 435 EM = # __T__	435	63	43.9841	0.1393	0.0317	0.1429	0.381		2771	8.7759	1.9971	9.0027	24.003
[03:30:56.389573] r = 436 EM = # __T__	436	160	57.4719	0.3273	0.1906	0.35	0.625		9195.5	52.368	30.496	56	100
[18:48:14.310301] r = 437 EM = # __T__	437	8	5.9375	0.547	0.375	0.625	0.75		47.5	4.376	3	5	6
[21:24:57.664063] r = 438 EM = # __T__	438	55	1349.42	0.1307	0.0909	0.1273	0.2		74218	7.1885	4.9995	7.0015	11
[21:13:40.556178] r = 439 EM = # __T__	439	16	1059.53	0.4634	0.3281	0.5469	0.7743		16952.5	7.4144	5.2496	8.7504	12.3888
[05:55:50.481354] r = 440 EM = # __T__	440	1	406	0.0025	0	0	0		406	0.0025	0	0	0
[01:38:59.803383] r = 441 EM = # __T__	441	266	132.827	0.231	0.1141	0.2461	0.4819		35332	61.446	30.3506	65.4626	128.185
[00:35:57.808212] r = 442 EM = # __T__	442	85	262.035	0.4029	0.2471	0.4	0.7819		22273	34.2465	21.0035	34	66.4615
[23:49:49.082371] r = 443 EM = # __T__	443	6	48	0.1273	0	0.3333	0.3333		288	0.7638	0	1.9998	1.9998
[21:22:13.228183] r = 444 EM = # __T__	444	9	41.4444	0.1469	0.1111	0.1111	0.1111		373	1.3221	0.9999	0.9999	0.9999
[20:59:18.439650] r = 445 EM = # __T__	445	0	0	0	0	0	0		0	0	0	0	0
[00:20:14.206380] r = 446 EM = # __T__	446	7	1.7143	0.7976	0.7143	0.8571	1		12.0001	5.5832	5.0001	5.9997	7
[23:00:48.658352] r = 447 EM = # __T__	447	7	45.7143	0.1031	0	0.1429	0.2857		320	0.7217	0	1.0003	1.9999
[19:06:15.149470] r = 448 EM = # __T__	448	16	104	0.2567	0.0625	0.375	0.5625		1664	4.1072	1	6	9
[01:08:09.390015] r = 449 EM = # __T__	449	20	23.75	0.1936	0.05	0.25	0.55		475	3.872	1	5	11
[22:04:37.044070] r = 450 EM = # __T__	450	127	1626.55	0.0043	0	0	0.0157		206572	0.5461	0	0	1.9939
[23:20:17.277091] r = 451 EM = # __T__	451	5	345.4	0.0032	0	0	0		1727	0.016	0	0	0
[20:40:18.075414] r = 452 EM = # __T__	452	214	99.8808	0.3192	0.1612	0.3972	0.6262		21374.5	68.3088	34.4968	85.0008	134.007
[20:32:11.379648] r = 453 EM = # __T__	453	167	181.668	0.48	0.2994	0.6347	0.7904		30338.5	80.16	49.9998	105.995	131.997
[17:38:06.668946] r = 454 EM = # __T__	454	0	0	0	0	0	0		0	0	0	0	0
[19:54:07.422694] r = 455 EM = # __T__	455	18	394.195	0.0338	0	0.0278	0.0556		7095.5	0.6084	0	0.5004	1.0008
[19:27:03.772929] r = 456 EM = # __T__	456	4	49.25	0.0203	0	0	0		197	0.0812	0	0	0
[17:51:29.086220] r = 457 EM = # __T__	457	3	1.6667	0.7778	0.6667	1	1		5.0001	2.3334	2.0001	3	3
[19:18:03.534171] r = 458 EM = # __T__	458	34	238.544	0.2479	0.1176	0.2647	0.5294		8110.5	8.4286	3.9984	8.9998	17.9996
[23:38:35.405491] r = 459 EM = # __T__	459	0	0	0	0	0	0		0	0	0	0	0
[00:57:34.214054] r = 460 EM = # __T__	460	3	2	0.6111	0.3333	1	1		6	1.8333	0.9999	3	3
[20:28:11.687081] r = 461 EM = # __T__	461	77	997.539	0.2422	0.1429	0.2727	0.4156		76810.5	18.6494	11.0033	20.9979	32.0012
[20:27:32.659646] r = 462 EM = # __T__	462	12	76.0833	0.0205	0	0	0		913	0.246	0	0	0
[19:01:33.124743] r = 463 EM = # __T__	463	13	26.4615	0.1095	0	0.0769	0.3846		344	1.4235	0	0.9997	4.9998
[04:14:00.104561] r = 464 EM = # __T__	464	0	0	0	0	0	0		0	0	0	0	0
[20:10:09.725984] r = 465 EM = # __T__	465	35	1620.16	0.0691	0.0571	0.0857	0.0857		56705.5	2.4185	1.9985	2.9995	2.9995
[04:54:24.616528] r = 466 EM = # __T__	466	20	746.95	0.2634	0.155	0.315	0.5389		14939	5.268	3.1	6.3	10.778
[20:07:38.265247] r = 467 EM = # __T__	467	96	280.708	0.2737	0.1354	0.3542	0.4896		26948	26.2752	12.9984	34.0032	47.0016
[03:21:18.524854] r = 468 EM = # __T__	468	5	1	1	1	1	1		5	5	5	5	5
[21:00:12.086777] r = 469 EM = # __T__	469	16	134.375	0.2085	0.125	0.25	0.3125		2150	3.336	2	4	5
[02:37:11.575182] r = 470 EM = # __T__	470	84	295.952	0.0972	0.0476	0.0833	0.1667		24860	8.1648	3.9984	6.9972	14.0028
[02:21:50.948287] r = 471 EM = # __T__	471	60	838.992	0.0042	0	0	0		50339.5	0.252	0	0	0
[18:15:57.466593] r = 472 EM = # __T__	472	15	6.1	0.404	0.2667	0.4667	0.8		91.5	6.06	4.0005	7.0005	12
[20:06:04.786629] r = 473 EM = # __T__	473	3	4851	0.0164	0	0	0		14553	0.0492	0	0	0

## Sheet: wn18rr_noemb
rubbish	r	#test	mr	mrr	h1	h3	h10
[23:51:10.586721] r = 0 EM = # __T__	0	1251	18084	0.0627	0.0409	0.0764	0.1061		2.26231e+07	78.4377	51.1659	95.5764	132.731		P2	Result Calculation					V2
[00:23:37.078749] r = 1 EM = # __T__	1	1074	307.638	0.8434	0.8004	0.8629	0.932		330404	905.812	859.63	926.755	1000.97		Name=	wn18rr noemb rules=1000 embed_dim=1 maxlen=5
[23:48:23.108194] r = 2 EM = # __T__	2	122	7389.33	0.3911	0.3096	0.4303	0.5624		901499	47.7142	37.7712	52.4966	68.6128		E=	11	← Fill this !!!
[23:31:15.068545] r = 3 EM = # __T__	3	56	6955.12	0.5915	0.5536	0.625	0.6352		389487	33.124	31.0016	35	35.5712		Cols=	C	J	K	L	M	N
[23:37:32.517928] r = 4 EM = # __T__	4	253	7235.84	0.0912	0.0621	0.1012	0.1493		1.83067e+06	23.0736	15.7113	25.6036	37.7729		Tmp=	3134	2.9855e+07	1205.66	1100.4	1260.67	1416.41
[23:33:23.412068] r = 5 EM = # __T__	5	114	6286.76	0.5907	0.5434	0.623	0.6886		716691	67.3398	61.9476	71.022	78.5004			3134	2.8407e+07	1153.77	1043.79	1201.53	1388.64
[23:35:25.494518] r = 6 EM = # __T__	6	172	12004	0.0563	0.0272	0.0652	0.1113		2.0647e+06	9.6836	4.6784	11.2144	19.1436			6268	5.8262e+07	2359.42	2144.2	2462.2	2805.05
[23:30:29.722095] r = 7 EM = # __T__	7	24	20358.7	0.0021	0	0	0.0046		488608	0.0504	0	0	0.1104		Result=
[23:43:34.166133] r = 8 EM = # __T__	8	26	19608.3	0.029	0.0192	0.0385	0.0385		509816	0.754	0.4992	1.001	1.001			9526.17	0.384702	0.351118	0.402255	0.45195
[00:12:29.344372] r = 9 EM = # __T__	9	39	1.1538	0.9402	0.8974	1	1		44.9982	36.6678	34.9986	39	39			9064.13	0.368145	0.333055	0.383386	0.443088
[00:00:39.406845] r = 10 EM = # __T__	10	3	1	1	1	1	1		3	3	3	3	3			9295.15	0.376424	0.342087	0.392821	0.447519
[00:29:15.144195] r = 11 EM = # __T__	11	1251	14974	0.0376	0.015	0.0373	0.0902		1.87325e+07	47.0376	18.765	46.6623	112.84
[00:51:09.947735] r = 12 EM = # __T__	12	1074	268.583	0.8677	0.823	0.8908	0.9693		288458	931.91	883.902	956.719	1041.03
[00:02:12.672764] r = 13 EM = # __T__	13	122	12257.2	0.0621	0.0146	0.092	0.1286		1.49538e+06	7.5762	1.7812	11.224	15.6892
[00:03:45.298868] r = 14 EM = # __T__	14	56	4756.63	0.5905	0.5179	0.6696	0.7438		266371	33.068	29.0024	37.4976	41.6528
[00:51:50.408866] r = 15 EM = # __T__	15	253	15619.9	0.1743	0.1402	0.2111	0.2251		3.95183e+06	44.0979	35.4706	53.4083	56.9503
[00:43:04.324183] r = 16 EM = # __T__	16	114	10821.1	0.05	0.0182	0.0545	0.1044		1.23361e+06	5.7	2.0748	6.213	11.9016
[00:48:33.344231] r = 17 EM = # __T__	17	172	10013.6	0.1741	0.119	0.1907	0.2931		1.72235e+06	29.9452	20.468	32.8004	50.4132
[00:33:49.155816] r = 18 EM = # __T__	18	24	12792.8	0.4585	0.4583	0.4584	0.4584		307026	11.004	10.9992	11.0016	11.0016
[00:37:59.949595] r = 19 EM = # __T__	19	26	15748.7	0.1542	0.1282	0.1924	0.1985		409467	4.0092	3.3332	5.0024	5.161
[00:36:16.590010] r = 20 EM = # __T__	20	39	1.2051	0.9338	0.8974	0.9744	1		46.9989	36.4182	34.9986	38.0016	39
[00:28:32.564814] r = 21 EM = # __T__	21	3	1	1	1	1	1		3	3	3	3	3

## Sheet: kinship_compare
rubbish	r	#test	mr	mrr	h1	h3	h10
[18:46:23.678959] r = 0 EM = # __T__	0	217	1.9954	0.7933	0.6636	0.9171	0.9908		433.002	172.146	144.001	199.011	215.004		P2	Result Calculation					V2
[19:02:55.852736] r = 1 EM = # __T__	1	230	9.8957	0.3692	0.1739	0.4174	0.8478		2276.01	84.916	39.997	96.002	194.994		Name=	kinship 325 rules=1000 embed_dim=default maxlen=3
[19:13:52.894430] r = 2 EM = # __T__	2	135	2.9259	0.5913	0.3852	0.7407	0.9704		394.996	79.8255	52.002	99.9945	131.004		E=	25	← Fill this !!!
[19:30:24.769736] r = 3 EM = # __T__	3	236	9.1144	0.4313	0.2458	0.5381	0.8093		2151	101.787	58.0088	126.992	190.995		Cols=	C	J	K	L	M	N
[19:43:10.187056] r = 4 EM = # __T__	4	126	5.8968	0.4275	0.2222	0.5159	0.9286		742.997	53.865	27.9972	65.0034	117.004		Tmp=	5343	49982.1	2433.15	1518.98	2895.03	4390.03
[19:58:31.462205] r = 5 EM = # __T__	5	393	14.9364	0.3184	0.1552	0.3868	0.6972		5870.01	125.131	60.9936	152.012	274			5343	59978	2124.87	1260.03	2463.93	4082.99
[20:12:46.354302] r = 6 EM = # __T__	6	407	9.1622	0.4621	0.285	0.5479	0.8477		3729.02	188.075	115.995	222.995	345.014			10686	109960	4558.02	2779.01	5358.96	8473.03
[20:22:51.057319] r = 7 EM = # __T__	7	255	1.9059	0.7306	0.5569	0.8824	0.9922		486.005	186.303	142.009	225.012	253.011		Result=
[20:36:40.210230] r = 8 EM = # __T__	8	190	14.0789	0.3765	0.2263	0.4368	0.7211		2674.99	71.535	42.997	82.992	137.009			9.35468	0.455389	0.284294	0.541837	0.821642
[20:49:59.546070] r = 9 EM = # __T__	9	499	7.3006	0.5122	0.3307	0.6273	0.8637		3643	255.588	165.019	313.023	430.986			11.2255	0.397693	0.235828	0.461151	0.764176
[21:04:38.824333] r = 10 EM = # __T__	10	234	4.7094	0.5105	0.2991	0.6538	0.9615		1102	119.457	69.9894	152.989	224.991			10.2901	0.426541	0.260061	0.501494	0.792909
[21:14:25.860070] r = 11 EM = # __T__	11	250	8.504	0.4439	0.264	0.552	0.812		2126	110.975	66	138	203
[21:25:45.746578] r = 12 EM = # __T__	12	282	16.5	0.3075	0.1596	0.3582	0.6525		4653	86.715	45.0072	101.012	184.005
[21:39:46.436154] r = 13 EM = # __T__	13	205	3.678	0.4957	0.2976	0.5756	0.9561		753.99	101.618	61.008	117.998	196
[21:52:39.786888] r = 14 EM = # __T__	14	427	9.0375	0.5144	0.37	0.5785	0.822		3859.01	219.649	157.99	247.019	350.994			Ours					No AG					RotatE
[22:08:15.229580] r = 15 EM = # __T__	15	112	5.1875	0.5103	0.3482	0.5714	0.8571		581	57.1536	38.9984	63.9968	95.9952		50	44.1474	0.0626307	0.0127215	0.0403361	0.13044	10.2901	0.426541	0.260061	0.501494	0.792909	45.8904	0.05854	0.00010949	0.00038274	0.00118379
[22:30:14.705581] r = 16 EM = # __T__	16	635	15.3465	0.3059	0.1417	0.3669	0.6898		9745.03	194.246	89.9795	232.982	438.023		100	9.53837	0.381714	0.224219	0.440483	0.737047	5.66536	0.516435	0.350829	0.60163	0.865516	12.9615	0.279267	0.134007	0.305821	0.613607
[22:45:34.692904] r = 17 EM = # __T__	17	117	4.1197	0.5983	0.4444	0.735	0.906		482.005	70.0011	51.9948	85.995	106.002		200	3.77106	0.634365	0.485595	0.72965	0.928418	4.035	0.596474	0.435808	0.696054	0.922052	5.2711	0.49421	0.322946	0.575332	0.870578
[22:55:07.326957] r = 18 EM = # __T__	18	188	14.4202	0.309	0.1489	0.3564	0.6702		2711	58.092	27.9932	67.0032	125.998		500	3.26063	0.694985	0.562702	0.788319	0.941047	3.39941	0.675034	0.536586	0.770444	0.940769	3.96743	0.622616	0.474453	0.718697	0.918304
[23:03:54.145386] r = 19 EM = # __T__	19	96	8.2188	0.4449	0.2292	0.5417	0.875		789.005	42.7104	22.0032	52.0032	84		1000	3.1135	0.709201	0.579637	0.804231	0.947602	3.21374	0.69275	0.555588	0.793095	0.946664	3.74069	0.637454	0.485682	0.743683	0.927288
[23:13:18.183218] r = 20 EM = # __T__	20	75	7.2267	0.5431	0.4133	0.5333	0.9067		542.003	40.7325	30.9975	39.9975	68.0025		2000	3.13944	0.718846	0.596012	0.807135	0.946848	3.17827	0.706762	0.577013	0.799923	0.948819	3.70017	0.65219	0.506551	0.753041	0.931686
[23:22:03.582665] r = 21 EM = # __T__	21	23	4.913	0.4993	0.3478	0.5652	0.8261		112.999	11.4839	7.9994	12.9996	19.0003
[23:35:30.816339] r = 22 EM = # __T__	22	8	11.25	0.0979	0	0	0.375		90	0.7832	0	0	3
[23:43:21.295137] r = 23 EM = # __T__	23	2	6.5	0.1548	0	0	1		13	0.3096	0	0	2
[23:46:04.771398] r = 24 EM = # __T__	24	1	21	0.0476	0	0	0		21	0.0476	0	0	0
[23:55:24.300636] r = 25 EM = # __T__	25	217	2.8157	0.6915	0.5576	0.7926	0.9585		611.007	150.055	120.999	171.994	207.995
[00:07:28.792626] r = 26 EM = # __T__	26	230	15.5478	0.3257	0.1609	0.3739	0.7		3575.99	74.911	37.007	85.997	161
[00:20:54.984860] r = 27 EM = # __T__	27	135	4.9037	0.5052	0.3333	0.6148	0.837		662	68.202	44.9955	82.998	112.995
[00:37:53.022628] r = 28 EM = # __T__	28	236	9.5551	0.4287	0.2458	0.5254	0.8093		2255	101.173	58.0088	123.994	190.995
[00:48:32.303498] r = 29 EM = # __T__	29	126	4.254	0.4994	0.2778	0.619	0.9762		536.004	62.9244	35.0028	77.994	123.001
[01:04:58.790366] r = 30 EM = # __T__	30	393	19.9618	0.2538	0.1018	0.3206	0.5776		7844.99	99.7434	40.0074	125.996	226.997
[01:16:01.318923] r = 31 EM = # __T__	31	407	15.484	0.2653	0.1351	0.2482	0.6364		6301.99	107.977	54.9857	101.017	259.015
[01:26:32.507094] r = 32 EM = # __T__	32	255	3.6039	0.5876	0.3922	0.7412	0.9412		918.995	149.838	100.011	189.006	240.006
[01:38:18.260091] r = 33 EM = # __T__	33	190	12.8368	0.3768	0.2368	0.3947	0.7526		2438.99	71.592	44.992	74.993	142.994
[01:54:25.962571] r = 34 EM = # __T__	34	499	10.1303	0.4052	0.2044	0.519	0.8136		5055.02	202.195	101.996	258.981	405.986
[02:09:32.205373] r = 35 EM = # __T__	35	234	12.3932	0.2831	0.1197	0.3034	0.6709		2900.01	66.2454	28.0098	70.9956	156.991
[02:21:46.555186] r = 36 EM = # __T__	36	250	9.124	0.4145	0.248	0.492	0.792		2281	103.625	62	123	198
[02:33:33.823779] r = 37 EM = # __T__	37	282	18.7482	0.2912	0.156	0.3156	0.6064		5286.99	82.1184	43.992	88.9992	171.005
[02:48:48.619691] r = 38 EM = # __T__	38	205	6.9805	0.4722	0.3268	0.4927	0.8537		1431	96.801	66.994	101.004	175.008
[02:58:52.897070] r = 39 EM = # __T__	39	427	14.1593	0.2976	0.1382	0.3372	0.6698		6046.02	127.075	59.0114	143.984	286.005
[03:11:22.416675] r = 40 EM = # __T__	40	112	4.4464	0.5623	0.4018	0.625	0.9107		497.997	62.9776	45.0016	70	101.998
[03:25:59.585579] r = 41 EM = # __T__	41	635	12.285	0.3776	0.2126	0.4488	0.7622		7800.98	239.776	135.001	284.988	483.997
[03:36:35.529074] r = 42 EM = # __T__	42	117	3.8889	0.6872	0.5641	0.7521	0.9231		455.001	80.4024	65.9997	87.9957	108.003
[03:46:09.058323] r = 43 EM = # __T__	43	188	10.617	0.315	0.1543	0.3404	0.75		1996	59.22	29.0084	63.9952	141
[04:01:43.181715] r = 44 EM = # __T__	44	96	3.3229	0.6046	0.4688	0.6875	0.9792		318.998	58.0416	45.0048	66	94.0032
[04:17:40.704463] r = 45 EM = # __T__	45	75	6.84	0.4974	0.3067	0.6	0.9067		513	37.305	23.0025	45	68.0025
[04:25:32.076186] r = 46 EM = # __T__	46	23	7.1739	0.694	0.5652	0.7826	0.913		165	15.962	12.9996	17.9998	20.999
[04:26:41.675206] r = 47 EM = # __T__	47	8	6.5	0.6986	0.625	0.75	0.75		52	5.5888	5	6	6
[04:27:49.769046] r = 48 EM = # __T__	48	2	7.5	0.5357	0.5	0.5	0.5		15	1.0714	1	1	1
[04:30:34.017118] r = 49 EM = # __T__	49	1	19	0.0526	0	0	0		19	0.0526	0	0	0
									0	0	0	0	0
									0	0	0	0	0
									0	0	0	0	0
									0	0	0	0	0
									0	0	0	0	0
									0	0	0	0	0
									0	0	0	0	0
									0	0	0	0	0
									0	0	0	0	0
									0	0	0	0	0
									0	0	0	0	0
									0	0	0	0	0
									0	0	0	0	0
									0	0	0	0	0
									0	0	0	0	0
									0	0	0	0	0
									0	0	0	0	0
									0	0	0	0	0
									0	0	0	0	0
									0	0	0	0	0
									0	0	0	0	0
									0	0	0	0	0
									0	0	0	0	0
									0	0	0	0	0
									0	0	0	0	0
									0	0	0	0	0
									0	0	0	0	0
									0	0	0	0	0
									0	0	0	0	0
									0	0	0	0	0
									0	0	0	0	0
									0	0	0	0	0
									0	0	0	0	0
									0	0	0	0	0
									0	0	0	0	0
									0	0	0	0	0
									0	0	0	0	0
									0	0	0	0	0
									0	0	0	0	0
									0	0	0	0	0
									0	0	0	0	0
									0	0	0	0	0
									0	0	0	0	0
									0	0	0	0	0
									0	0	0	0	0
									0	0	0	0	0
									0	0	0	0	0
									0	0	0	0	0
									0	0	0	0	0
									0	0	0	0	0
									0	0	0	0	0
									0	0	0	0	0
									0	0	0	0	0
									0	0	0	0	0
									0	0	0	0	0
									0	0	0	0	0
									0	0	0	0	0
									0	0	0	0	0
									0	0	0	0	0
									0	0	0	0	0
									0	0	0	0	0
									0	0	0	0	0
									0	0	0	0	0
									0	0	0	0	0
									0	0	0	0	0
									0	0	0	0	0
									0	0	0	0	0
									0	0	0	0	0
									0	0	0	0	0
									0	0	0	0	0
									0	0	0	0	0
									0	0	0	0	0
									0	0	0	0	0
									0	0	0	0	0
									0	0	0	0	0
									0	0	0	0	0
									0	0	0	0	0
									0	0	0	0	0
									0	0	0	0	0
									0	0	0	0	0
									0	0	0	0	0
									0	0	0	0	0
									0	0	0	0	0
									0	0	0	0	0
									0	0	0	0	0
									0	0	0	0	0
									0	0	0	0	0
									0	0	0	0	0
									0	0	0	0	0
									0	0	0	0	0
									0	0	0	0	0
									0	0	0	0	0
									0	0	0	0	0
									0	0	0	0	0
									0	0	0	0	0
									0	0	0	0	0
									0	0	0	0	0
									0	0	0	0	0
									0	0	0	0	0
									0	0	0	0	0
									0	0	0	0	0
									0	0	0	0	0
									0	0	0	0	0
									0	0	0	0	0
									0	0	0	0	0
									0	0	0	0	0
									0	0	0	0	0
									0	0	0	0	0
									0	0	0	0	0
									0	0	0	0	0
									0	0	0	0	0
									0	0	0	0	0
									0	0	0	0	0
									0	0	0	0	0
									0	0	0	0	0
									0	0	0	0	0
									0	0	0	0	0
									0	0	0	0	0
									0	0	0	0	0
									0	0	0	0	0
									0	0	0	0	0
									0	0	0	0	0
									0	0	0	0	0
									0	0	0	0	0
									0	0	0	0	0
									0	0	0	0	0
									0	0	0	0	0
									0	0	0	0	0
									0	0	0	0	0
									0	0	0	0	0
									0	0	0	0	0
									0	0	0	0	0
									0	0	0	0	0
									0	0	0	0	0
									0	0	0	0	0
									0	0	0	0	0
									0	0	0	0	0
									0	0	0	0	0
									0	0	0	0	0
									0	0	0	0	0
									0	0	0	0	0
									0	0	0	0	0
									0	0	0	0	0
									0	0	0	0	0
									0	0	0	0	0
									0	0	0	0	0
									0	0	0	0	0
									0	0	0	0	0
									0	0	0	0	0
									0	0	0	0	0
									0	0	0	0	0
									0	0	0	0	0
									0	0	0	0	0
									0	0	0	0	0
									0	0	0	0	0
									0	0	0	0	0
									0	0	0	0	0
									0	0	0	0	0
									0	0	0	0	0
									0	0	0	0	0
									0	0	0	0	0
									0	0	0	0	0
									0	0	0	0	0
									0	0	0	0	0
									0	0	0	0	0
									0	0	0	0	0
									0	0	0	0	0
									0	0	0	0	0
									0	0	0	0	0
									0	0	0	0	0
									0	0	0	0	0
									0	0	0	0	0
									0	0	0	0	0
									0	0	0	0	0
									0	0	0	0	0
									0	0	0	0	0
									0	0	0	0	0
									0	0	0	0	0
									0	0	0	0	0
									0	0	0	0	0
									0	0	0	0	0
									0	0	0	0	0
									0	0	0	0	0
									0	0	0	0	0
									0	0	0	0	0
									0	0	0	0	0
									0	0	0	0	0
									0	0	0	0	0
									0	0	0	0	0
									0	0	0	0	0
									0	0	0	0	0
									0	0	0	0	0
									0	0	0	0	0
									0	0	0	0	0
									0	0	0	0	0
									0	0	0	0	0
									0	0	0	0	0
									0	0	0	0	0
									0	0	0	0	0
									0	0	0	0	0
									0	0	0	0	0
									0	0	0	0	0
									0	0	0	0	0
									0	0	0	0	0
									0	0	0	0	0
									0	0	0	0	0
									0	0	0	0	0
									0	0	0	0	0
									0	0	0	0	0
									0	0	0	0	0
									0	0	0	0	0
									0	0	0	0	0
									0	0	0	0	0
									0	0	0	0	0
									0	0	0	0	0
									0	0	0	0	0
									0	0	0	0	0
									0	0	0	0	0
									0	0	0	0	0
									0	0	0	0	0
									0	0	0	0	0
									0	0	0	0	0
									0	0	0	0	0
									0	0	0	0	0
									0	0	0	0	0
									0	0	0	0	0
									0	0	0	0	0
									0	0	0	0	0
									0	0	0	0	0
									0	0	0	0	0
									0	0	0	0	0
									0	0	0	0	0
									0	0	0	0	0
									0	0	0	0	0
									0	0	0	0	0
									0	0	0	0	0
									0	0	0	0	0
									0	0	0	0	0
									0	0	0	0	0
									0	0	0	0	0
									0	0	0	0	0
									0	0	0	0	0
									0	0	0	0	0
									0	0	0	0	0
									0	0	0	0	0
									0	0	0	0	0
									0	0	0	0	0
									0	0	0	0	0
									0	0	0	0	0
									0	0	0	0	0
									0	0	0	0	0
									0	0	0	0	0
									0	0	0	0	0
									0	0	0	0	0
									0	0	0	0	0
									0	0	0	0	0
									0	0	0	0	0
									0	0	0	0	0
									0	0	0	0	0
									0	0	0	0	0
									0	0	0	0	0
									0	0	0	0	0
									0	0	0	0	0
									0	0	0	0	0
									0	0	0	0	0
									0	0	0	0	0
									0	0	0	0	0
									0	0	0	0	0
									0	0	0	0	0
									0	0	0	0	0
									0	0	0	0	0
									0	0	0	0	0
									0	0	0	0	0
									0	0	0	0	0
									0	0	0	0	0
									0	0	0	0	0
									0	0	0	0	0
									0	0	0	0	0
									0	0	0	0	0
									0	0	0	0	0
									0	0	0	0	0
									0	0	0	0	0
									0	0	0	0	0
									0	0	0	0	0
									0	0	0	0	0
									0	0	0	0	0
									0	0	0	0	0
									0	0	0	0	0
									0	0	0	0	0
									0	0	0	0	0
									0	0	0	0	0
									0	0	0	0	0
									0	0	0	0	0
									0	0	0	0	0
									0	0	0	0	0
									0	0	0	0	0
									0	0	0	0	0
									0	0	0	0	0
									0	0	0	0	0
									0	0	0	0	0
									0	0	0	0	0
									0	0	0	0	0
									0	0	0	0	0
									0	0	0	0	0
									0	0	0	0	0
									0	0	0	0	0
									0	0	0	0	0
									0	0	0	0	0
									0	0	0	0	0
									0	0	0	0	0
									0	0	0	0	0
									0	0	0	0	0
									0	0	0	0	0
									0	0	0	0	0
									0	0	0	0	0
									0	0	0	0	0
									0	0	0	0	0
									0	0	0	0	0
									0	0	0	0	0
									0	0	0	0	0
									0	0	0	0	0
									0	0	0	0	0
									0	0	0	0	0
									0	0	0	0	0
									0	0	0	0	0
									0	0	0	0	0
									0	0	0	0	0
									0	0	0	0	0
									0	0	0	0	0
									0	0	0	0	0
									0	0	0	0	0
									0	0	0	0	0
									0	0	0	0	0
									0	0	0	0	0
									0	0	0	0	0
									0	0	0	0	0
									0	0	0	0	0
									0	0	0	0	0
									0	0	0	0	0
									0	0	0	0	0
									0	0	0	0	0
									0	0	0	0	0
									0	0	0	0	0
									0	0	0	0	0
									0	0	0	0	0
									0	0	0	0	0
									0	0	0	0	0
									0	0	0	0	0
									0	0	0	0	0
									0	0	0	0	0
									0	0	0	0	0
									0	0	0	0	0
									0	0	0	0	0
									0	0	0	0	0
									0	0	0	0	0
									0	0	0	0	0
									0	0	0	0	0
									0	0	0	0	0
									0	0	0	0	0
									0	0	0	0	0
									0	0	0	0	0
									0	0	0	0	0
									0	0	0	0	0
									0	0	0	0	0
									0	0	0	0	0
									0	0	0	0	0
									0	0	0	0	0
									0	0	0	0	0
									0	0	0	0	0
									0	0	0	0	0
									0	0	0	0	0
									0	0	0	0	0
									0	0	0	0	0
									0	0	0	0	0
									0	0	0	0	0
									0	0	0	0	0
									0	0	0	0	0
									0	0	0	0	0
									0	0	0	0	0
									0	0	0	0	0
									0	0	0	0	0
									0	0	0	0	0
									0	0	0	0	0
									0	0	0	0	0
									0	0	0	0	0
									0	0	0	0	0
									0	0	0	0	0
									0	0	0	0	0
									0	0	0	0	0
									0	0	0	0	0
									0	0	0	0	0
									0	0	0	0	0
									0	0	0	0	0
									0	0	0	0	0
									0	0	0	0	0
									0	0	0	0	0
									0	0	0	0	0
									0	0	0	0	0
									0	0	0	0	0
									0	0	0	0	0
									0	0	0	0	0
									0	0	0	0	0
									0	0	0	0	0
									0	0	0	0	0
									0	0	0	0	0
									0	0	0	0	0
									0	0	0	0	0
									0	0	0	0	0
									0	0	0	0	0
									0	0	0	0	0
									0	0	0	0	0
									0	0	0	0	0
									0	0	0	0	0
									0	0	0	0	0
									0	0	0	0	0
									0	0	0	0	0
									0	0	0	0	0
									0	0	0	0	0
									0	0	0	0	0
									0	0	0	0	0
									0	0	0	0	0
									0	0	0	0	0
									0	0	0	0	0
									0	0	0	0	0

## Sheet: umls_compare
rubbish	r	#test	mr	mrr	h1	h3	h10
[01:48:35.596550] r = 0 EM = # __T__	0	150	2.6133	0.8801	0.8467	0.9067	0.94		391.995	132.015	127.005	136.005	141		P2	Result Calculation					V2
[02:00:31.199594] r = 1 EM = # __T__	1	86	1.4651	0.9133	0.8605	0.9767	0.9884		125.999	78.5438	74.003	83.9962	85.0024		Name=	kinship 325 rules=1000 embed_dim=default maxlen=3
[02:22:36.070108] r = 2 EM = # __T__	2	246	8.8252	0.7139	0.6016	0.7927	0.8943		2171	175.619	147.994	195.004	219.998		E=	25	← Fill this !!!
[02:38:23.024639] r = 3 EM = # __T__	3	528	2.1098	0.7917	0.6761	0.9034	0.9773		1113.97	418.018	356.981	476.995	516.014		Cols=	C	J	K	L	M	N
[02:55:19.523135] r = 4 EM = # __T__	4	115	1.5391	0.9221	0.8957	0.9391	0.9739		176.996	106.041	103.006	107.997	111.998		Tmp=	2953	7280.98	2541.12	2347.99	2704.02	2877.02
[03:10:02.046157] r = 5 EM = # __T__	5	227	1.7401	0.7766	0.652	0.8811	1		395.003	176.288	148.004	200.01	227			1309	7195	984.155	837.986	1087.98	1201.01
[03:25:15.104999] r = 6 EM = # __T__	6	282	1.3688	0.9529	0.9326	0.9681	0.9894		386.002	268.718	262.993	273.004	279.011			4262	14476	3525.28	3185.97	3792	4078.03
[03:36:35.882657] r = 7 EM = # __T__	7	143	1.1259	0.9666	0.951	0.986	1		161.004	138.224	135.993	140.998	143		Result=
[03:46:57.143494] r = 8 EM = # __T__	8	38	4.6053	0.7659	0.7105	0.8158	0.8421		175.001	29.1042	26.999	31.0004	31.9998			2.46562	0.860523	0.795119	0.915686	0.974271
[03:57:39.327656] r = 9 EM = # __T__	9	30	11.6333	0.8243	0.8	0.8	0.9		348.999	24.729	24	24	27			5.49656	0.751837	0.640173	0.831156	0.917499
[04:09:01.519951] r = 10 EM = # __T__	10	154	1.3117	0.9329	0.8896	0.9675	0.9935		202.002	143.667	136.998	148.995	152.999			3.39652	0.827142	0.74753	0.889724	0.956834
[04:14:59.295968] r = 11 EM = # __T__	11	17	1.7059	0.8992	0.8824	0.8824	1		29.0003	15.2864	15.0008	15.0008	17
[04:14:59.420298] r = 12 EM = # Skipped # __T__	12	0	0	0	0	0	0		0	0	0	0	0
[04:29:03.012057] r = 13 EM = # __T__	13	223	2.0493	0.8817	0.8296	0.9193	0.9955		456.994	196.619	185.001	205.004	221.996
[04:38:38.782022] r = 14 EM = # __T__	14	37	2.5405	0.6227	0.4324	0.7838	0.973		93.9985	23.0399	15.9988	29.0006	36.001			Ours					No AG					RotatE
[04:48:32.297901] r = 15 EM = # __T__	15	71	1.2113	0.9131	0.8451	1	1		86.0023	64.8301	60.0021	71	71		50	9.21164	0.615579	0.516654	0.668229	0.815817	5.85124	0.772761	0.70578	0.806425	0.901687	15.9274	0.344034	0.205882	0.393229	0.620711
[05:14:19.428044] r = 16 EM = # __T__	16	155	1	1	1	1	1		155	155	155	155	155		100	4.29259	0.817539	0.755273	0.853827	0.941584	4.31042	0.79519	0.720328	0.847724	0.934777	8.36994	0.54505	0.39905	0.632506	0.823529
[05:24:55.083460] r = 17 EM = # __T__	17	74	1.2703	0.9737	0.9595	0.9865	0.9865		94.0022	72.0538	71.003	73.001	73.001		200	3.82074	0.827853	0.762081	0.871666	0.948847	4.0122	0.819908	0.746822	0.866499	0.948849	5.62684	0.659847	0.533701	0.744945	0.897518
[05:34:40.769516] r = 18 EM = # __T__	18	80	2.025	0.8374	0.775	0.8875	0.9625		162	66.992	62	71	77		500	3.88433	0.817228	0.742841	0.865082	0.95355	3.47912	0.832444	0.762088	0.880347	0.956364	4.54871	0.725813	0.617647	0.801471	0.923866
[05:45:17.627040] r = 19 EM = # __T__	19	11	1.0909	0.9545	0.9091	1	1		11.9999	10.4995	10.0001	11	11		1000	3.37752	0.84002	0.77522	0.885734	0.956363	3.28131	0.849296	0.789303	0.892067	0.96105	4.05714	0.739568	0.629136	0.8197	0.936428
[05:58:01.127941] r = 20 EM = # __T__	20	183	1.7432	0.8689	0.8033	0.929	0.9836		319.006	159.009	147.004	170.007	179.999		2000	3.39652	0.827142	0.74753	0.889724	0.956834	3.42186	0.83673	0.76842	0.889234	0.954251	3.93719	0.745872	0.637714	0.828125	0.937653
[06:07:51.082050] r = 21 EM = # __T__	21	12	2	0.9231	0.9167	0.9167	0.9167		24	11.0772	11.0004	11.0004	11.0004
[06:17:48.743071] r = 22 EM = # __T__	22	29	1.0345	0.9828	0.9655	1	1		30.0005	28.5012	27.9995	29	29
[06:28:10.318993] r = 23 EM = # __T__	23	35	4.0571	0.5976	0.5143	0.5429	0.9429		141.999	20.916	18.0005	19.0015	33.0015
[06:38:09.766583] r = 24 EM = # __T__	24	27	1.0741	0.9753	0.963	1	1		29.0007	26.3331	26.001	27	27
[06:46:52.968334] r = 25 EM = # __T__	25	26	1	1	1	1	1		26	26	26	26	26
[06:48:17.197007] r = 26 EM = # __T__	26	14	1	1	1	1	1		14	14	14	14	14
[06:56:29.375344] r = 27 EM = # __T__	27	18	4.2222	0.8936	0.8889	0.8889	0.8889		75.9996	16.0848	16.0002	16.0002	16.0002
[06:59:21.346864] r = 28 EM = # __T__	28	4	5.5	0.4429	0.25	0.5	0.75		22	1.7716	1	2	3
[07:07:54.797407] r = 29 EM = # __T__	29	33	3.2424	0.7006	0.5758	0.7879	0.9091		106.999	23.1198	19.0014	26.0007	30.0003
[07:16:28.482934] r = 30 EM = # __T__	30	15	1.2	0.95	0.9333	0.9333	1		18	14.25	13.9995	13.9995	15
[07:26:16.580967] r = 31 EM = # __T__	31	31	17.1935	0.42	0.2258	0.5161	0.7419		532.999	13.02	6.9998	15.9991	22.9989
[07:40:03.023095] r = 32 EM = # __T__	32	45	1.5778	0.868	0.8222	0.8889	1		71.001	39.06	36.999	40.0005	45
[07:43:05.101681] r = 33 EM = # __T__	33	6	2.8333	0.7652	0.6667	0.8333	0.8333		16.9998	4.5912	4.0002	4.9998	4.9998
[07:59:02.232113] r = 34 EM = # __T__	34	39	1	1	1	1	1		39	39	39	39	39
[08:07:06.128988] r = 35 EM = # __T__	35	12	88.6667	0.0292	0	0	0.0833		1064	0.3504	0	0	0.9996
[08:15:33.579937] r = 36 EM = # __T__	36	27	3.0741	0.5926	0.4815	0.5926	1		83.0007	16.0002	13.0005	16.0002	27
[08:24:16.757963] r = 37 EM = # __T__	37	18	1.1667	0.9583	0.9444	0.9444	1		21.0006	17.2494	16.9992	16.9992	18
[08:27:09.170237] r = 38 EM = # __T__	38	2	1.5	0.75	0.5	1	1		3	1.5	1	2	2
[08:30:09.094896] r = 39 EM = # __T__	39	7	13.7143	0.6255	0.5714	0.7143	0.7143		96.0001	4.3785	3.9998	5.0001	5.0001
[08:30:09.466538] r = 40 EM = # Skipped # __T__	40	0	0	0	0	0	0		0	0	0	0	0
[08:30:09.466697] r = 41 EM = # Skipped # __T__	41	0	0	0	0	0	0		0	0	0	0	0
[08:33:18.758155] r = 42 EM = # __T__	42	0	0	0	0	0	0		0	0	0	0	0
[08:41:23.792406] r = 43 EM = # __T__	43	2	8.5	0.2024	0	0.5	0.5		17	0.4048	0	1	1
[08:41:24.971555] r = 44 EM = # Skipped # __T__	44	0	0	0	0	0	0		0	0	0	0	0
[08:41:24.971719] r = 45 EM = # Skipped # __T__	45	0	0	0	0	0	0		0	0	0	0	0
[08:54:29.201988] r = 46 EM = # __T__	46	150	1.3867	0.8988	0.8267	0.9533	0.9867		208.005	134.82	124.005	142.995	148.005
[09:08:19.453409] r = 47 EM = # __T__	47	86	2.5	0.8898	0.8372	0.9302	0.9651		215	76.5228	71.9992	79.9972	82.9986
[09:21:28.439811] r = 48 EM = # __T__	48	246	12.3252	0.5449	0.4309	0.6016	0.752		3032	134.045	106.001	147.994	184.992
[09:44:31.641903] r = 49 EM = # __T__	49	528	2.9034	0.7727	0.6136	0.9053	0.9754		1533	407.986	323.981	477.998	515.011
[10:02:49.392822] r = 50 EM = # __T__	50	115	1.113	0.9623	0.9391	0.9826	1		127.995	110.665	107.997	112.999	115
[10:15:04.398938] r = 51 EM = # __T__	51	227	2.7665	0.629	0.4802	0.7093	0.9868		627.995	142.783	109.005	161.011	224.004
[10:28:52.799685] r = 52 EM = # __T__	52	282	3.6879	0.8786	0.8404	0.9007	0.9433		1039.99	247.765	236.993	253.997	266.011
[10:39:52.890879] r = 53 EM = # __T__	53	143	1.1049	0.9476	0.8951	1	1		158.001	135.507	127.999	143	143
[10:51:54.715640] r = 54 EM = # __T__	54	38	2.2632	0.829	0.7632	0.8684	0.9474		86.0016	31.502	29.0016	32.9992	36.0012
[11:01:16.663720] r = 55 EM = # __T__	55	30	3.6667	0.8688	0.8	0.9333	0.9333		110.001	26.064	24	27.999	27.999
[11:12:15.525878] r = 56 EM = # __T__	56	154	2.3961	0.7728	0.6623	0.8766	0.9675		368.999	119.011	101.994	134.996	148.995
[11:14:02.360768] r = 57 EM = # __T__	57	17	1	1	1	1	1		17	17	17	17	17
[11:14:02.428852] r = 58 EM = # Skipped # __T__	58	0	0	0	0	0	0		0	0	0	0	0
[11:26:49.011622] r = 59 EM = # __T__	59	223	1.5561	0.858	0.7803	0.9148	0.9955		347.01	191.334	174.007	204	221.996
[11:41:32.730662] r = 60 EM = # __T__	60	37	1.5946	0.9202	0.8919	0.9459	0.973		59.0002	34.0474	33.0003	34.9983	36.001
[11:51:50.481693] r = 61 EM = # __T__	61	71	1	1	1	1	1		71	71	71	71	71
[12:03:16.481744] r = 62 EM = # __T__	62	155	1	1	1	1	1		155	155	155	155	155
[12:14:00.274119] r = 63 EM = # __T__	63	74	1.0676	0.9662	0.9324	1	1		79.0024	71.4988	68.9976	74	74
[12:29:10.396137] r = 64 EM = # __T__	64	80	1	1	1	1	1		80	80	80	80	80
[12:40:11.483169] r = 65 EM = # __T__	65	11	1	1	1	1	1		11	11	11	11	11
[12:50:06.395053] r = 66 EM = # __T__	66	183	1.1366	0.9708	0.9617	0.9727	1		207.998	177.656	175.991	178.004	183
[12:52:14.275493] r = 67 EM = # __T__	67	12	1	1	1	1	1		12	12	12	12	12
[13:03:08.169907] r = 68 EM = # __T__	68	29	1	1	1	1	1		29	29	29	29	29
[13:15:35.198812] r = 69 EM = # __T__	69	35	1.4857	0.8771	0.8286	0.8571	1		51.9995	30.6985	29.001	29.9985	35
[13:28:25.425001] r = 70 EM = # __T__	70	27	1.037	0.9815	0.963	1	1		27.999	26.5005	26.001	27	27
[13:36:43.628402] r = 71 EM = # __T__	71	26	3.6923	0.8422	0.7692	0.9231	0.9231		95.9998	21.8972	19.9992	24.0006	24.0006
[13:44:41.272853] r = 72 EM = # __T__	72	14	2.6429	0.8146	0.7857	0.7857	0.9286		37.0006	11.4044	10.9998	10.9998	13.0004
[13:53:55.342356] r = 73 EM = # __T__	73	18	15.0556	0.8898	0.8889	0.8889	0.8889		271.001	16.0164	16.0002	16.0002	16.0002
[13:56:49.104730] r = 74 EM = # __T__	74	4	1.25	0.875	0.75	1	1		5	3.5	3	4	4
[14:09:50.352985] r = 75 EM = # __T__	75	33	1	1	1	1	1		33	33	33	33	33
[14:18:32.157025] r = 76 EM = # __T__	76	15	9.0667	0.7283	0.6667	0.8	0.8		136.001	10.9245	10.0005	12	12
[14:32:57.394806] r = 77 EM = # __T__	77	31	3.6452	0.9681	0.9677	0.9677	0.9677		113.001	30.0111	29.9987	29.9987	29.9987
[14:44:22.192363] r = 78 EM = # __T__	78	45	1.6667	0.959	0.9556	0.9556	0.9778		75.0015	43.155	43.002	43.002	44.001
[14:47:22.952296] r = 79 EM = # __T__	79	6	1	1	1	1	1		6	6	6	6	6
[14:57:24.605075] r = 80 EM = # __T__	80	39	1	1	1	1	1		39	39	39	39	39
[15:06:02.773213] r = 81 EM = # __T__	81	12	54.8333	0.1318	0.0833	0.1667	0.1667		658	1.5816	0.9996	2.0004	2.0004
[15:16:19.557173] r = 82 EM = # __T__	82	27	1	1	1	1	1		27	27	27	27	27
[15:24:49.090394] r = 83 EM = # __T__	83	18	1.2778	0.8796	0.7778	1	1		23.0004	15.8328	14.0004	18	18
[15:27:39.656113] r = 84 EM = # __T__	84	2	1.5	0.75	0.5	1	1		3	1.5	1	2	2
[15:30:32.436599] r = 85 EM = # __T__	85	7	8.2857	0.61	0.5714	0.5714	0.8571		57.9999	4.27	3.9998	3.9998	5.9997
[15:30:32.754660] r = 86 EM = # Skipped # __T__	86	0	0	0	0	0	0		0	0	0	0	0
[15:30:32.754760] r = 87 EM = # Skipped # __T__	87	0	0	0	0	0	0		0	0	0	0	0
[15:33:45.465286] r = 88 EM = # __T__	88	0	0	0	0	0	0		0	0	0	0	0
[15:41:52.632780] r = 89 EM = # __T__	89	2	4	0.2667	0	0.5	1		8	0.5334	0	1	2
[15:41:53.889047] r = 90 EM = # Skipped # __T__	90	0	0	0	0	0	0		0	0	0	0	0
[15:41:53.889186] r = 91 EM = # Skipped # __T__	91	0	0	0	0	0	0		0	0	0	0	0
									0	0	0	0	0
									0	0	0	0	0
									0	0	0	0	0
									0	0	0	0	0
									0	0	0	0	0
									0	0	0	0	0
									0	0	0	0	0
									0	0	0	0	0
									0	0	0	0	0
									0	0	0	0	0
									0	0	0	0	0
									0	0	0	0	0
									0	0	0	0	0
									0	0	0	0	0
									0	0	0	0	0
									0	0	0	0	0
									0	0	0	0	0
									0	0	0	0	0
									0	0	0	0	0
									0	0	0	0	0
									0	0	0	0	0
									0	0	0	0	0
									0	0	0	0	0
									0	0	0	0	0
									0	0	0	0	0
									0	0	0	0	0
									0	0	0	0	0
									0	0	0	0	0
									0	0	0	0	0
									0	0	0	0	0
									0	0	0	0	0
									0	0	0	0	0
									0	0	0	0	0
									0	0	0	0	0
									0	0	0	0	0
									0	0	0	0	0
									0	0	0	0	0
									0	0	0	0	0
									0	0	0	0	0
									0	0	0	0	0
									0	0	0	0	0
									0	0	0	0	0
									0	0	0	0	0
									0	0	0	0	0
									0	0	0	0	0
									0	0	0	0	0
									0	0	0	0	0
									0	0	0	0	0
									0	0	0	0	0
									0	0	0	0	0
									0	0	0	0	0
									0	0	0	0	0
									0	0	0	0	0
									0	0	0	0	0
									0	0	0	0	0
									0	0	0	0	0
									0	0	0	0	0
									0	0	0	0	0
									0	0	0	0	0
									0	0	0	0	0
									0	0	0	0	0
									0	0	0	0	0
									0	0	0	0	0
									0	0	0	0	0
									0	0	0	0	0
									0	0	0	0	0
									0	0	0	0	0
									0	0	0	0	0
									0	0	0	0	0
									0	0	0	0	0
									0	0	0	0	0
									0	0	0	0	0
									0	0	0	0	0
									0	0	0	0	0
									0	0	0	0	0
									0	0	0	0	0
									0	0	0	0	0
									0	0	0	0	0
									0	0	0	0	0
									0	0	0	0	0
									0	0	0	0	0
									0	0	0	0	0
									0	0	0	0	0
									0	0	0	0	0
									0	0	0	0	0
									0	0	0	0	0
									0	0	0	0	0
									0	0	0	0	0
									0	0	0	0	0
									0	0	0	0	0
									0	0	0	0	0
									0	0	0	0	0
									0	0	0	0	0
									0	0	0	0	0
									0	0	0	0	0
									0	0	0	0	0
									0	0	0	0	0
									0	0	0	0	0
									0	0	0	0	0
									0	0	0	0	0
									0	0	0	0	0
									0	0	0	0	0
									0	0	0	0	0
									0	0	0	0	0
									0	0	0	0	0
									0	0	0	0	0
									0	0	0	0	0
									0	0	0	0	0
									0	0	0	0	0
									0	0	0	0	0
									0	0	0	0	0
									0	0	0	0	0
									0	0	0	0	0
									0	0	0	0	0
									0	0	0	0	0
									0	0	0	0	0
									0	0	0	0	0
									0	0	0	0	0
									0	0	0	0	0
									0	0	0	0	0
									0	0	0	0	0
									0	0	0	0	0
									0	0	0	0	0
									0	0	0	0	0
									0	0	0	0	0
									0	0	0	0	0
									0	0	0	0	0
									0	0	0	0	0
									0	0	0	0	0
									0	0	0	0	0
									0	0	0	0	0
									0	0	0	0	0
									0	0	0	0	0
									0	0	0	0	0
									0	0	0	0	0
									0	0	0	0	0
									0	0	0	0	0
									0	0	0	0	0
									0	0	0	0	0
									0	0	0	0	0
									0	0	0	0	0
									0	0	0	0	0
									0	0	0	0	0
									0	0	0	0	0
									0	0	0	0	0
									0	0	0	0	0
									0	0	0	0	0
									0	0	0	0	0
									0	0	0	0	0
									0	0	0	0	0
									0	0	0	0	0
									0	0	0	0	0
									0	0	0	0	0
									0	0	0	0	0
									0	0	0	0	0
									0	0	0	0	0
									0	0	0	0	0
									0	0	0	0	0
									0	0	0	0	0
									0	0	0	0	0
									0	0	0	0	0
									0	0	0	0	0
									0	0	0	0	0
									0	0	0	0	0
									0	0	0	0	0
									0	0	0	0	0
									0	0	0	0	0
									0	0	0	0	0
									0	0	0	0	0
									0	0	0	0	0
									0	0	0	0	0
									0	0	0	0	0
									0	0	0	0	0
									0	0	0	0	0
									0	0	0	0	0
									0	0	0	0	0
									0	0	0	0	0
									0	0	0	0	0
									0	0	0	0	0
									0	0	0	0	0
									0	0	0	0	0
									0	0	0	0	0
									0	0	0	0	0
									0	0	0	0	0
									0	0	0	0	0
									0	0	0	0	0
									0	0	0	0	0
									0	0	0	0	0
									0	0	0	0	0
									0	0	0	0	0
									0	0	0	0	0
									0	0	0	0	0
									0	0	0	0	0
									0	0	0	0	0
									0	0	0	0	0
									0	0	0	0	0
									0	0	0	0	0
									0	0	0	0	0
									0	0	0	0	0
									0	0	0	0	0
									0	0	0	0	0
									0	0	0	0	0
									0	0	0	0	0
									0	0	0	0	0
									0	0	0	0	0
									0	0	0	0	0
									0	0	0	0	0
									0	0	0	0	0
									0	0	0	0	0
									0	0	0	0	0
									0	0	0	0	0
									0	0	0	0	0
									0	0	0	0	0
									0	0	0	0	0
									0	0	0	0	0
									0	0	0	0	0
									0	0	0	0	0
									0	0	0	0	0
									0	0	0	0	0
									0	0	0	0	0
									0	0	0	0	0
									0	0	0	0	0
									0	0	0	0	0
									0	0	0	0	0
									0	0	0	0	0
									0	0	0	0	0
									0	0	0	0	0
									0	0	0	0	0
									0	0	0	0	0
									0	0	0	0	0
									0	0	0	0	0
									0	0	0	0	0
									0	0	0	0	0
									0	0	0	0	0
									0	0	0	0	0
									0	0	0	0	0
									0	0	0	0	0
									0	0	0	0	0
									0	0	0	0	0
									0	0	0	0	0
									0	0	0	0	0
									0	0	0	0	0
									0	0	0	0	0
									0	0	0	0	0
									0	0	0	0	0
									0	0	0	0	0
									0	0	0	0	0
									0	0	0	0	0
									0	0	0	0	0
									0	0	0	0	0
									0	0	0	0	0
									0	0	0	0	0
									0	0	0	0	0
									0	0	0	0	0
									0	0	0	0	0
									0	0	0	0	0
									0	0	0	0	0
									0	0	0	0	0
									0	0	0	0	0
									0	0	0	0	0
									0	0	0	0	0
									0	0	0	0	0
									0	0	0	0	0
									0	0	0	0	0
									0	0	0	0	0
									0	0	0	0	0
									0	0	0	0	0
									0	0	0	0	0
									0	0	0	0	0
									0	0	0	0	0
									0	0	0	0	0
									0	0	0	0	0
									0	0	0	0	0
									0	0	0	0	0
									0	0	0	0	0
									0	0	0	0	0
									0	0	0	0	0
									0	0	0	0	0
									0	0	0	0	0
									0	0	0	0	0
									0	0	0	0	0
									0	0	0	0	0
									0	0	0	0	0
									0	0	0	0	0
									0	0	0	0	0
									0	0	0	0	0
									0	0	0	0	0
									0	0	0	0	0
									0	0	0	0	0
									0	0	0	0	0
									0	0	0	0	0
									0	0	0	0	0
									0	0	0	0	0
									0	0	0	0	0
									0	0	0	0	0
									0	0	0	0	0
									0	0	0	0	0
									0	0	0	0	0
									0	0	0	0	0
									0	0	0	0	0
									0	0	0	0	0
									0	0	0	0	0
									0	0	0	0	0
									0	0	0	0	0
									0	0	0	0	0
									0	0	0	0	0
									0	0	0	0	0
									0	0	0	0	0
									0	0	0	0	0
									0	0	0	0	0
									0	0	0	0	0
									0	0	0	0	0
									0	0	0	0	0
									0	0	0	0	0
									0	0	0	0	0
									0	0	0	0	0
									0	0	0	0	0
									0	0	0	0	0
									0	0	0	0	0
									0	0	0	0	0
									0	0	0	0	0
									0	0	0	0	0
									0	0	0	0	0
									0	0	0	0	0
									0	0	0	0	0
									0	0	0	0	0
									0	0	0	0	0
									0	0	0	0	0
									0	0	0	0	0
									0	0	0	0	0
									0	0	0	0	0
									0	0	0	0	0
									0	0	0	0	0
									0	0	0	0	0
									0	0	0	0	0
									0	0	0	0	0
									0	0	0	0	0
									0	0	0	0	0
									0	0	0	0	0
									0	0	0	0	0
									0	0	0	0	0
									0	0	0	0	0
									0	0	0	0	0
									0	0	0	0	0
									0	0	0	0	0
									0	0	0	0	0
									0	0	0	0	0
									0	0	0	0	0
									0	0	0	0	0
									0	0	0	0	0
									0	0	0	0	0
									0	0	0	0	0
									0	0	0	0	0
									0	0	0	0	0
									0	0	0	0	0
									0	0	0	0	0
									0	0	0	0	0
									0	0	0	0	0
									0	0	0	0	0
									0	0	0	0	0
									0	0	0	0	0
									0	0	0	0	0
									0	0	0	0	0
									0	0	0	0	0
									0	0	0	0	0
									0	0	0	0	0
									0	0	0	0	0
									0	0	0	0	0
									0	0	0	0	0
									0	0	0	0	0
									0	0	0	0	0
									0	0	0	0	0
									0	0	0	0	0
									0	0	0	0	0
									0	0	0	0	0
									0	0	0	0	0
									0	0	0	0	0
									0	0	0	0	0
									0	0	0	0	0
									0	0	0	0	0
									0	0	0	0	0
									0	0	0	0	0
